# Supplementary material for: Education Against Tobacco (EAT): a quasi-experimental prospective evaluation of a programme for preventing smoking in secondary schools delivered by medical students: a study protocol
Source: PubMed Central journal article supplement — BMJ Open. 2014 Jul 24;4(7):e004909. doi: 10.1136/bmjopen-2014-004909 (PMC4120302; doi:10.1136/bmjopen-2014-004909), 2014-07-24
Supplement: bmjopen-2014-004909.draft_revisions.pdf [file bmjopen-2014-004909.draft_revisions.pdf]

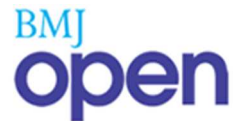

**Education Against Tobacco (EAT) - Evaluation of a school-based program for preventing smoking delivered by medical students: a study protocol**

|                                 |                                                                                                                                                                                                                                                                                                                                                                                                              |
|---------------------------------|--------------------------------------------------------------------------------------------------------------------------------------------------------------------------------------------------------------------------------------------------------------------------------------------------------------------------------------------------------------------------------------------------------------|
| Journal:                        | <i>BMJ Open</i>                                                                                                                                                                                                                                                                                                                                                                                              |
| Manuscript ID:                  | bmjopen-2014-004909                                                                                                                                                                                                                                                                                                                                                                                          |
| Article Type:                   | Protocol                                                                                                                                                                                                                                                                                                                                                                                                     |
| Date Submitted by the Author:   | 22-Jan-2014                                                                                                                                                                                                                                                                                                                                                                                                  |
| Complete List of Authors:       | Brinker, Titus; Goethe-University, Institute of Occupational Medicine, Social Medicine and Environmental Medicine<br>Stamm-Balderjahn, Sabine; Charité – Universitätsmedizin Berlin, Institute of Medical Sociology<br>Werner, Seeger; Max-Planck Institute for Heart and Lung Research, Groneberg, David; Goethe-University, Institute of Occupational Medicine, Social Medicine and Environmental Medicine |
| <b>Primary Subject Heading</b>: | Smoking and tobacco                                                                                                                                                                                                                                                                                                                                                                                          |
| Secondary Subject Heading:      | Smoking and tobacco, Epidemiology, Public health                                                                                                                                                                                                                                                                                                                                                             |
| Keywords:                       | smoking prevention, school, tobacco, tobacco prevention, adolescent smoking, school-based prevention                                                                                                                                                                                                                                                                                                         |
|                                 |                                                                                                                                                                                                                                                                                                                                                                                                              |

SCHOLARONE™  
Manuscripts

1  
2  
3  
4  
5 **Education Against Tobacco (EAT) - Evaluation of a school-based program for**  
6 **preventing smoking delivered by medical students: a study protocol**  
7  
8  
9

10  
11 Titus J. Brinker<sup>1\*</sup>, Sabine Stamm-Balderjahn<sup>2</sup>, Werner Seeger<sup>3</sup>, David A. Groneberg<sup>1</sup>  
12  
13

14  
15  
16 <sup>1</sup> Institute of Occupational Medicine, Social Medicine and Environmental  
17 Medicine, Goethe-University, 60590 Frankfurt, Germany  
18  
19

20  
21 <sup>2</sup> Institute of Medical Sociology, Charité – Universitätsmedizin Berlin,  
22 Luisenstraße 13 A, 10117 Berlin, Germany  
23  
24

25  
26 <sup>3</sup> Max-Planck Institute for Heart and Lung Research, 61231 Bad Nauheim,  
27 Germany  
28  
29

30  
31  
32 E-mails: titus.brinker@gmail.com (TJB), sabine.stamm-balderjahn@charite.de (SS-  
33 B), werner.seeger@mpi-bn.mpg.de (WS), arsozmed@uni-frankfurt.de (DAG)  
34  
35  
36

37  
38 \* Author to whom correspondence should be addressed: Titus Brinker, Institute of  
39 Occupational Medicine, Social Medicine and Environmental Medicine, Goethe-  
40 University, 60590 Frankfurt, Email: titus.brinker@gmail.com  
41  
42  
43  
44  
45  
46  
47  
48  
49  
50  
51  
52  
53  
54  
55  
56  
57  
58  
59  
60

**ABSTRACT**

*Background:* In a survey conducted and published by the Federal Centre for Health Education in Germany in 2012 35.2% of all young adults (18 to 25 years) and 12.0% of all adolescents (12 to 17 years) described themselves as regular cigarette smokers. Most smokers have consumed their first cigarettes in early adolescence. We recently reported a significantly positive short-term effect of a school-based smoking prevention program on the smoking behaviour of school children delivered by physicians in Germany. Since physician-based programs are usually very expensive, we aim to evaluate and optimize the widespread low-cost program “education against tobacco” which is being delivered by about 400 medical students at 16 universities in Germany.

*Methods/Design:* We perform a prospective case-control study with quasi-experimental design among 10 to 15-year old children of secondary schools in Germany visiting school grades six to eight. The intervention program consists of two medical-student delivered modules within the schools of about 60 minutes duration each. The first module also involves patients with tobacco related diseases. The control group does not receive any intervention.

To collect the data, we designed and pre-tested a questionnaire measuring the smoking status (water pipe and cigarette smoking), smoking-related cognitions as well as gender, social, and cultural aspects. Data will be collected at baseline and six months post the intervention.

*Discussion:* This study protocol describes the design of a prospective case-control study that will evaluate the effectiveness of a school-based smoking prevention program delivered by medical students. We expect that a significantly lower number of children will start smoking in the intervention group compared to the control group

1  
2  
3 as a direct result of this intervention. We will optimize the curriculum on the basis of  
4  
5 the results of this evaluation to make it optimally effective for both genders and  
6  
7 different ethnic groups.  
8  
9

### 10 11 **Strengths and limitations of this study**

12  
13  
14 A consequence of our research is suspected to be the general acceptance that  
15  
16 medical students and even more medical interns (PJ-medical students) offer a great  
17  
18 opportunity to deliver prevention programs. Therefore, health systems worldwide may  
19  
20 largely benefit from the development of a novel and low-cost measure of primary  
21  
22 prevention. A main limitation would be the fact that our research is not been done  
23  
24 multinationally and therefore might not be representative for every ethnical and  
25  
26 cultural background. Futhermore, the case and the control groups were in the same  
27  
28 schools which is a potential confounding variable as the pupils could exchange what  
29  
30 they have learned about smoking due to the intervention during the school breaks.  
31  
32  
33  
34  
35

36 **Keywords:** smoking prevention, school-based prevention, primary prevention,  
37  
38 medical students, schools, adolescents  
39  
40  
41  
42  
43

### 44 **Background**

45  
46 Tobacco consumption is a risk factor for various diseases and leads to the highest  
47  
48 number of avoidable deaths worldwide [1]. Despite warning labels and public  
49  
50 interventions, smoking causes diseases and death in Germany where it was  
51  
52 responsible for almost 107.000 deaths in 2007 [2, 3]. In addition, it generates high  
53  
54 financial costs. A study which modelled the costs of productivity losses due to  
55  
56 smoking in Germany for the year 2005 [3] calculated productivity costs of 9.6 billion  
57  
58  
59  
60

1  
2  
3 Euro which were caused by smoking. Most smokers started smoking in early  
4  
5 adolescence [4]. In a survey conducted and published by the Federal Centre for  
6  
7 Health Education (Bundeszentrale für gesundheitliche Aufklärung, BZgA) in Germany  
8  
9 in 2012 35.2% of all young adults (18 to 25 years) and 12.0% of all adolescents (12  
10  
11 to 17 years) described themselves as regular cigarette smokers [5]. Furthermore, in  
12  
13 the past few years there was an increase in the use of water pipes [6]. According to a  
14  
15 survey conducted by the Federal Centre for Health Education in 2011, 8.7% of  
16  
17 adolescents and 11.2% of the participating young adults had smoked water pipe at  
18  
19 least once in the 30 days leading up to the survey [6]. Male respondents have  
20  
21 smoked water pipe more frequently than women [6]. According to Maziak, water  
22  
23 pipes lead the way to cigarette smoking and have similarly deleterious effects for  
24  
25 human health [7].  
26  
27  
28  
29

30  
31 A survey conducted in 2006 quantified nicotine dependency with the help of the  
32  
33 Fagerström test [8]. It reported that 50.8% of the 15– to 17-year-old smokers and  
34  
35 41.8% of those in the 18– to 24-year age group were dependent on nicotine. Laucht  
36  
37 and Schmid reported a correlation between the number of cigarettes smoked and the  
38  
39 starting age in 15-year-old adolescents [9]. It was demonstrated that the earlier in life  
40  
41 they had smoked their first cigarette, the more likely they were still consuming  
42  
43 tobacco, the more cigarettes they were currently consuming and the higher was their  
44  
45 degree of dependence.  
46  
47  
48

49  
50 Early primary prevention of smoking is thus of crucial importance and therefore  
51  
52 should be promoted, evaluated and optimized.  
53  
54

### 55 **School-based smoking prevention program**

56  
57  
58  
59  
60

1  
2  
3 The registered association „education against tobacco“ (hereinafter referred to as  
4 "EAT") has been founded and developed since August 2011 by medical student Titus  
5 Brinker of the University of Gießen in cooperation with professors from the  
6  
7 Universities of Gießen, Frankfurt and Marburg as well as fellow students from the  
8  
9 Texas A&M University. The program has been developed taking into account the  
10  
11 Cochrane Database Systematic Review on school-based programmes for preventing  
12  
13 smoking (2006)(13) in regard of its conclusion to focus on the development of low  
14  
15 cost prevention programs and its implication for research to combine social  
16  
17 influences approaches with generic social competence approaches. Both of these  
18  
19 key points have been taken into account when developing the EAT curriculum. At the  
20  
21 time of development there was already research available which encouraged EAT to  
22  
23 use medical students as Sussman et al [10] concluded that health educator-led drug  
24  
25 prevention programs are more effective than self-instructed programs.  
26  
27  
28  
29  
30  
31

32  
33 Since physician-based programs have proven to be successful [12] but usually are  
34  
35 very expensive, we aim to evaluate and optimize the widespread low-cost program  
36  
37 “education against tobacco“ which is being delivered by about 400 medical students  
38  
39 at 16 universities in Germany. The city of Gießen provides an excellent platform to  
40  
41 evaluate this effect as it homes the largest EAT group with the highest experience  
42  
43 level and the most participating EAT schools.  
44  
45  
46  
47

## 48 **Objectives**

49  
50  
51 In the past years, prevention science has emerged as a research discipline built on  
52  
53 the integration of life course development research, community epidemiology, and  
54  
55 preventive intervention trials. Our objective is to integrate these aspects in order to  
56  
57  
58  
59  
60

1  
2  
3 promote prevention in the area of tobacco addiction with a focus on low cost  
4  
5 widespread programs.  
6  
7

8 We plan to evaluate the effect on the smoking behavior of the curriculum being  
9  
10 delivered by medical students in order to reach a sound basis for a future, nation-  
11  
12 wide program. In this connection, we consider gender, social, and cultural aspects of  
13  
14 the intervention in order to optimize the curriculum which includes the design of an  
15  
16 evidence-based and easy to implement train the trainer EAT program as a  
17  
18 consequence of this study by engulfing recent research knowledge on smoking  
19  
20 related diseases. By doing this, we plan to improve the education of the health  
21  
22 educators (participating medical students) by the use of additional expert knowledge  
23  
24 on the topic. This train the trainer program also sensitizes the medical students –  
25  
26 regardless of their future medical specialization – towards the needs of tobacco  
27  
28 prevention and thus increases the knowledge on prevention among the future  
29  
30 physicians.  
31  
32  
33  
34  
35

36 Consequently, it is our strategy to perpetuate the program on a national level by  
37  
38 developing a system for the integration of EAT into the structure of medical faculties  
39  
40 and large teaching hospitals. In this respect, we will customize the project for an  
41  
42 integration of EAT into elective courses (Wahlfächer) or cross sectional areas  
43  
44 (Querschnittsbereiche) such as prevention (QB10) or environmental medicine (QB6)  
45  
46 at the medical schools of the 16 EAT partner universities.  
47  
48  
49

## 50 **Methods**

### 51 **Study design and setting**

1  
2  
3 The survey will be designed as a prospective case-control study with quasi-  
4 experimental design. We could not afford randomization as it includes a huge  
5 organizational and personal effort we were not capable to perform. In addition, some  
6 classes would not agree to participate within the study when they would be  
7 predetermined as control groups which became clear in advance of the investigation.  
8 To keep confounding factors to a minimum, the parallel class of intervention classes  
9 in a given grade is selected for the control group. To maximize the external validity of  
10 the intervention, the questionnaires will be put into envelopes which are instantly  
11 being sealed by the responsible class teachers after completion. The teachers sign a  
12 brief declaration where they state to be fully responsible for the sealing process  
13 directly after the questionnaires have been filled out by the pupils. The envelopes will  
14 be opened and the data evaluation will be performed under the supervision of Prof.  
15 Dr. Groneberg at the Goethe University Frankfurt. The class teachers individually  
16 supervise their classes for the completion of the questionnaire.  
17  
18  
19  
20  
21  
22  
23  
24  
25  
26  
27  
28  
29  
30  
31  
32  
33  
34

35 For the collection of the data we will use a written survey in the form of a  
36 questionnaire. This questionnaire is developed to collect data to each of the defined  
37 time points (t1-t2). In addition to the socio-demographic data (age, gender, school  
38 type), we will obtain the smoking status of the school students concerning water pipe  
39 and cigarettes.  
40  
41  
42  
43  
44  
45  
46  
47

48 The questionnaire will contain numerous items which have already been a part of  
49 similar investigations. The questions about the smoking status and the frequency of  
50 smoking refer to the evaluation of the school-based smoking prevention program  
51 from Heidelberg „ohne Kippe“ [13] and the publication of Lampert and Thamm [14]  
52 about the results of the child and adolescent surveys (KiGGS).  
53  
54  
55  
56  
57  
58  
59  
60



1  
2  
3 The period of time of the survey is planned to be from October 2013 until July of  
4  
5 2014. Participants in two study groups (intervention by medical students and control)  
6  
7 will be questioned up to 2 weeks in advance of the intervention (t1) and 6 months  
8  
9 thereafter (t2) (see Figure 1).  
10

11 To test the questionnaire in accordance to the GEP guidelines [15], we carried out 88  
12  
13 copies to pupils with the lowest education level participating in May 2013. We  
14  
15 investigated that 85 of these questionnaires were filled out in a useful way for  
16  
17 evaluation. However, seven pupils did not fill out the questionnaire completely. We  
18  
19 added a notification to turn the page at the bottom of each page to fix this problem.  
20  
21  
22  
23

## 24 **Participants and Sample Size**

### 25 *Eligibility criteria*

26  
27  
28 Students aged 10 to 15 attending a secondary general, intermediate, grammar, or  
29  
30 comprehensive school are eligible. The schools in Gießen and the surrounding cities  
31  
32 are already involved in the program and let their classes participate every year.  
33  
34  
35 Participation is voluntary and could be ended at any time without giving a reason.  
36  
37  
38  
39

### 40 *Legal approval*

41  
42  
43 In accordance to Good Epidemiologic Practice (GEP) guidelines[15], approval of the  
44  
45 responsible ethics committee was asked for and the committee decided that the  
46  
47 study does not need ethical approval (ethics committee of the Goethe University,  
48  
49 Frankfurt am Main, Germany). All legal preparations and data protection issues have  
50  
51 been discussed with the responsible ministry of education and cultural affairs in  
52  
53 Germany. The ministry gave approval for the stated proceed of data collection within  
54  
55 the participating schools. In addition, each school individually discussed and  
56  
57  
58  
59  
60

1  
2  
3 approved the study in its schools' conference. The participation of each student was  
4  
5 declared to be voluntarily and informed written consent was obtained from the  
6  
7 parents of the study participants.  
8  
9

### 10 *Sample Size Calculation*

11  
12  
13  
14 The recruitment sample was calculated on the basis of a recently published study  
15  
16 [12] and will amount to 1.002 pupils (n1 = 501 participating in the medical students  
17  
18 delivered intervention n2 = 501 pupils in the control group) at least at a test power of  
19  
20 80% (alpha = 0,05). In consideration of the loss to follow-up effect, it is planned to  
21  
22 include at least 1.200 participants (600 per group).  
23  
24  
25  
26  
27  
28  
29  
30  
31  
32  
33  
34  
35  
36  
37  
38  
39  
40  
41  
42  
43  
44  
45  
46  
47  
48  
49  
50  
51  
52  
53  
54  
55  
56  
57  
58  
59  
60

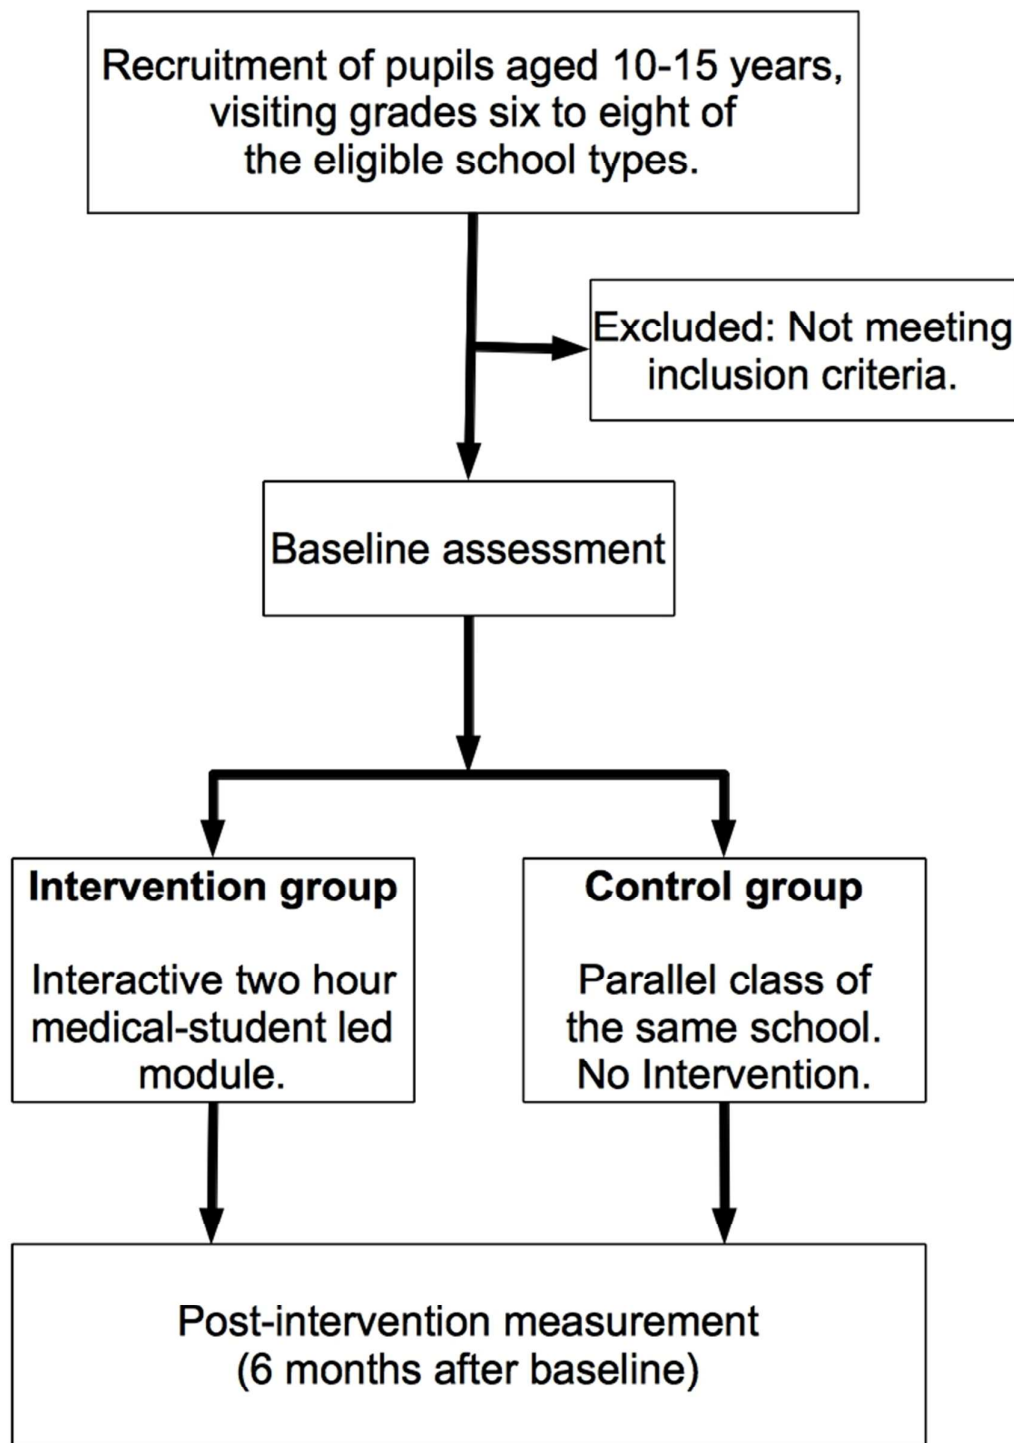

**Figure 1**  
**Study design.**

## Intervention

The intervention consists of two parts of 60 minutes duration each. The first part is delivered in a large room in front of all pupils of the grade including a patient with a tobacco related disease talking about his own experiences with tobacco addiction and an information giving power point presentation. The second session is performed in an interactive classroom setting with two medical students mentoring one class. In advance of the school visit, the medical students receive brief didactic instructions, information on tobacco addiction and FAQs for preparation and a detailed plan of the curriculum. The EAT program uses a combined information giving, social competences and social influences approach.

## Gender specific aspects

According to our recent study using the physician-based approach for school-based tobacco prevention [12], girls benefit from physician-delivered programs more than boys (OR 2.56, CI 1.06–6.19). We aim to assess if this result is also obtained using the EAT medical student-based approach to address gender-specific aspects. As a consequence, the program then needs to be modified for gender mainstreaming since both sexes need to be addressed equally.

## Cultural aspects

We hypothesize a small but significant relation between water pipe smoking and the cultural background of the pupils since tobacco smoking using a water pipe is traditional in the region of the Middle East [16]. Therefore, we plan to collect data about the cultural background. With regard to this hypothesis, comprehensive information about water pipe smoking is an integrative element of the EAT

1  
2  
3 curriculum. Within the projected optimization process, the EAT curriculum can also  
4  
5 be structured in relation to the different school populations which can be encountered  
6  
7 (i.e. schools with a high percentage of pupils of migration background vs. schools  
8  
9 without).  
10

### 11 12 13 **Social aspects**

14  
15  
16 According to a survey conducted by the Federal Centre for Health Education [5], the  
17  
18 prevalence of cigarette smoking in the age group of 10 to 15 year old pupils was  
19  
20 significantly higher in schools with lower education levels in Germany in 2012 (16,7%  
21  
22 vs. 6,9%)(16). As a consequence, we plan to specifically address schools with lower  
23  
24 education levels and to compare the effects on different school types.  
25  
26  
27

### 28 29 **Outcomes**

30  
31  
32 The primary endpoint is the percentage difference between smokers and non-  
33  
34 smokers in the two study arms at baseline and 6 months after the intervention  
35  
36 (lifetime prevalence). Measures of smoking behavior (the number of cigarettes and  
37  
38 water pipes smoked) will be studied as secondary outcome measures.  
39  
40  
41

### 42 43 **Statistical analysis**

44  
45  
46 In order to determine relevant effect sizes in consideration of the measurements  
47  
48 before and after the intervention, we plan to use the  $\chi^2$ -square-test for frequency  
49  
50 distributions. In addition, we plan to use the t-Test/the Wilcoxon-test for mean value  
51  
52 differences of paired and unpaired samples. In order to illustrate the attitude towards  
53  
54 smoking between the intervention groups and the control group during the time  
55  
56 progress of the study we plan to use the univariate variance analysis. For the  
57  
58 calculation of the predictors of the smoking behavior we use the logistic regression  
59  
60

1  
2  
3 analysis which is the state-of-the-art technique for the evaluation of the effectiveness  
4  
5 of prevention programs [13, 17, 18].  
6

7 The test for significance is planned on the 5% level (double-sided), confidence  
8  
9 intervals for 95% (double-sided). The software for our analysis is planned to be the  
10  
11 newest version of SPSS Statistics for Mac by IBM.  
12  
13

## 14 **Discussion**

15  
16  
17  
18 So far, medical student delivered school-based programmes for preventing smoking  
19  
20 have not been evaluated. Therefore, only little relevant data is available in scientific  
21  
22 databases such as Medline or PubMed. The most relevant publication on the topic is  
23  
24 the Cochrane Database Analysis on school-based programs for preventing smoking  
25  
26 [19]. The authors analyzed the data from 134 studies, in 25 different countries, which  
27  
28 included a total of 428.293 young people aged 5-18. Of these, 49 studies reported  
29  
30 smoking behavior in those adolescents who had never previously smoked. The  
31  
32 authors concluded that further research is required to design and test programs that  
33  
34 will be equally effective for both genders, different cultural backgrounds and ethnic  
35  
36 groups. Interventions delivered by adult educators were shown to be more effective  
37  
38 in the longer term than peer-education programs. In this respect, medical students  
39  
40 belong to the group of adult educators. According to the Cochrane Analysis, cost-  
41  
42 effectiveness plays an important role for practical implementation. As EAT is  
43  
44 delivered by volunteering medical students, it is less expensive but more available  
45  
46 than physician delivered programs.  
47  
48  
49  
50

51  
52 The Cochrane Database Analysis did not include recently published data on school-  
53  
54 based health educator delivered programs in Germany. Within the evaluation of the  
55  
56 physician-based program "Students in the Hospital" in Berlin, significant positive  
57  
58 results were present for an information-based curriculum [12].  
59  
60

1  
2  
3 An anonymous survey by questionnaire from September 2007 to July 2008 was  
4  
5 conducted, with a quasi-experimental control-group design, two weeks before (t1)  
6  
7 and six months after (t2) the intervention in a group of 760 participating school  
8  
9 students in Berlin.  
10

11  
12 The results indicated that 40.8% of the participants were smokers, among whom  
13  
14 79% stated that they also smoked water pipes. As major primary prevention outcome  
15  
16 of the study, it was found that significantly fewer students in the intervention group  
17  
18 than in the control group began smoking in the six months after the intervention  
19  
20 ( $p < 0.001$ ). In addition, the chance of remaining a non-smoker was four times as high  
21  
22 in the intervention group (OR, 4.14; CI, 1.66–10.36). Concerning gender aspects,  
23  
24 girls appeared to benefit more from the intervention than boys (OR 2.56, CI 1.06–  
25  
26 6.19)(1). 16.1% of smokers in the intervention group and 17.6% in the control group  
27  
28 stopped smoking ( $p > 0.05$ ). Conclusively, a clear primary preventive effect of the  
29  
30 program was demonstrated.  
31  
32  
33  
34  
35

36 Since physician-based programmes are usually very expensive, it is indicated to  
37  
38 evaluate a less expensive and widespread program.  
39  
40

## 41 **Conclusion**

42  
43 A consequence of our research is suspected to be the general acceptance that  
44  
45 medical students and even more medical interns (PJ-medical students) offer a great  
46  
47 opportunity to deliver primary prevention programs. This does not only refer to  
48  
49 inpatient secondary prevention but especially refers to primary prevention within the  
50  
51 community/school. Therefore, the German health system may largely benefit from  
52  
53 the development of a novel and low-cost measure of primary prevention.  
54  
55  
56  
57  
58  
59  
60

### Authors' contributions:

TJB participated in the design of the study, carries out the study, drafted the manuscript and is supposed to perform the statistical analysis. WS supports the coordination of the study. SS-B participated in the design of the study, participated in the writing process and corrected the manuscript. DAG participated in the design of the study and corrected the manuscript. All authors read and approved the final manuscript.

### Competing interests:

The authors declare that they have no competing interests.

### REFERENCES

1. Organization WH: **WHO report on the global tobacco epidemic.** [http://whqlibdocwho.int/publications/2011/9789240687813\\_engpdf](http://whqlibdocwho.int/publications/2011/9789240687813_engpdf) 2011.
2. Mons U: **[Tobacco-attributable mortality in Germany and in the German Federal States - calculations with data from a microcensus and mortality statistics].** *Gesundheitswesen* 2011, **73**(4):238-246.
3. Prenzler A, Mittendorf T, von der Schulenburg JM: **[Modelling of the costs of productivity losses due to smoking in Germany for the year 2005].** *Gesundheitswesen* 2007, **69**(11):635-643.
4. Haustein K-O GD: **Tobacco or Health? Physiological and Social Damages Caused by Tobacco Smoking.** In: *Springer 2009.* edn.; 2009.
5. (BZgA) FCfHEiGBfgA: **Tobacco consumption of adolescents in Germany in 2012.** In: *Teilband Rauchen (Bericht).* 2013.
6. (BZgA) FCfHEiGBfgA: **Die Drogenaffinität Jugendlicher in der Bundesrepublik Deutschland 2011.** In: *Teilband Rauchen (Bericht).* 2012.
7. Maziak W: **The global epidemic of waterpipe smoking.** *Addictive behaviors* 2011, **36**(1-2):1-5.
8. Kraus L RS, Baumeister SE, Pabst A, Steiner S: **Epidemiologischer Suchtsurvey 2006. Repräsentativerhebung zum Gebrauch und Missbrauch psychoaktiver Substanzen bei Jugendlichen und Erwachsenen in Berlin.** . In: *IFT-Bericht Band 167.* München 2008.; 2006.
9. Laucht M SB: **Früher Einstieg in den Alkohol- und Tabakkonsum – Indikator für eine erhöhte Suchtgefährdung? .** *Z Kinder Jugendpsychiatr Psychother* 2007;35: 137–143.
10. Sussman S SP, McCuller WJ, Dent CW (Institute for Health Promotion and Disease Prevention Research, Department of Preventive Medicine, University of Southern



- California, Alhambra, CA 91803, USA. ssussma@hsc.usc.edu): **Project Towards No Drug Abuse: two-year outcomes of a trial that compares health educator delivery to self-instruction.**
11. Haustein KO GD: **Chapter 12: Primary Prevention.** . In: *Tobacco or Health 2nd Edition* edn. Springer Verlag Heidelberg, 359-386; 2009.: Groneberg DA; 2009.
  12. Stamm-Balderjahn S, Groneberg DA, Kusma B, Jagota A, Schonfeld N: **Smoking prevention in school students: positive effects of a hospital-based intervention.** *Deutsches Arzteblatt international* 2012, **109**(44):746-752.
  13. Maier B, Bau AM, James J, Gorgen R, Graf C, Hanewinkel R, Martus P, Maschewsky-Schneider U, Muller MJ, Plachta-Danielzik S *et al*: **Methods for evaluation of health promotion programmes. Smoking prevention and obesity prevention for children and adolescents.** *Bundesgesundheitsblatt, Gesundheitsforschung, Gesundheitsschutz* 2007, **50**(7):980-986.
  14. Lampert T, Thamm M: **[Consumption of tobacco, alcohol and drugs among adolescents in Germany. Results of the German Health Interview and Examination Survey for Children and Adolescents (KiGGS)].** *Bundesgesundheitsblatt, Gesundheitsforschung, Gesundheitsschutz* 2007, **50**(5-6):600-608.
  15. (DAE) AEMdDAfrE: **Leitlinien und Empfehlungen zur Sicherung von Guter Epidemiologischer Praxis (GEP).** *BMBF Gesundheitsforschung*: [http://www.gesundheitsforschung-bmbf.de/ media/Empfehlungen\\_GEPpdf](http://www.gesundheitsforschung-bmbf.de/media/Empfehlungen_GEPpdf) 2004.
  16. Akl EA, Gunukula SK, Aleem S, Obeid R, Jaoude PA, Honeine R, Irani J: **The prevalence of waterpipe tobacco smoking among the general and specific populations: a systematic review.** *BMC public health* 2011, **11**:244.
  17. Pbert L, Flint AJ, Fletcher KE, Young MH, Druker S, DiFranza JR: **Effect of a pediatric practice-based smoking prevention and cessation intervention for adolescents: a randomized, controlled trial.** *Pediatrics* 2008, **121**(4):e738-747.
  18. Sloboda Z, Stephens RC, Stephens PC, Grey SF, Teasdale B, Hawthorne RD, Williams J, Marquette JF: **The Adolescent Substance Abuse Prevention Study: A randomized field trial of a universal substance abuse prevention program.** *Drug and alcohol dependence* 2009, **102**(1-3):1-10.
  19. Thomas RE, McLellan J, Perera R: **School-based programmes for preventing smoking.** *The Cochrane database of systematic reviews* 2013, **4**:CD001293.

## STROBE Statement—checklist of items that should be included in reports of observational studies

|                              | Item No | Recommendation                                                                                                                                                                                                                                                                                                                                                                                                                        |
|------------------------------|---------|---------------------------------------------------------------------------------------------------------------------------------------------------------------------------------------------------------------------------------------------------------------------------------------------------------------------------------------------------------------------------------------------------------------------------------------|
| <b>Title and abstract</b>    | 1       | (a) Indicate the study's design with a commonly used term in the title or the abstract<br>(b) Provide in the abstract an informative and balanced summary of what was done and what was found <b>checked</b>                                                                                                                                                                                                                          |
| <b>Introduction</b>          |         |                                                                                                                                                                                                                                                                                                                                                                                                                                       |
| Background/rationale         | 2       | Explain the scientific background and rationale for the investigation being reported <b>checked</b>                                                                                                                                                                                                                                                                                                                                   |
| Objectives                   | 3       | State specific objectives, including any prespecified hypotheses <b>checked</b>                                                                                                                                                                                                                                                                                                                                                       |
| <b>Methods</b>               |         |                                                                                                                                                                                                                                                                                                                                                                                                                                       |
| Study design                 | 4       | Present key elements of study design early in the paper <b>checked</b>                                                                                                                                                                                                                                                                                                                                                                |
| Setting                      | 5       | Describe the setting, locations, and relevant dates, including periods of recruitment, exposure, follow-up, and data collection <b>checked</b>                                                                                                                                                                                                                                                                                        |
| Participants                 | 6       | (a) <i>Case-control study</i> —Give the eligibility criteria, and the sources and methods of case ascertainment and control selection. Give the rationale for the choice of cases and controls <b>checked</b><br>(b) <i>Case-control study</i> —For matched studies, give matching criteria and the number of controls per case <b>checked</b>                                                                                        |
| Variables                    | 7       | Clearly define all outcomes, exposures, predictors, potential confounders, and effect modifiers. Give diagnostic criteria, if applicable <b>checked</b>                                                                                                                                                                                                                                                                               |
| Data sources/<br>measurement | 8*      | For each variable of interest, give sources of data and details of methods of assessment (measurement). Describe comparability of assessment methods if there is more than one group <b>checked</b>                                                                                                                                                                                                                                   |
| Bias                         | 9       | Describe any efforts to address potential sources of bias <b>checked</b>                                                                                                                                                                                                                                                                                                                                                              |
| Study size                   | 10      | Explain how the study size was arrived at <b>checked</b>                                                                                                                                                                                                                                                                                                                                                                              |
| Quantitative variables       | 11      | Explain how quantitative variables were handled in the analyses. If applicable, describe which groupings were chosen and why <b>checked</b>                                                                                                                                                                                                                                                                                           |
| Statistical methods          | 12      | (a) Describe all statistical methods, including those used to control for confounding <b>checked</b><br>(b) Describe any methods used to examine subgroups and interactions <b>checked</b><br>(c) Explain how missing data were addressed <b>checked</b><br><i>Case-control study</i> —If applicable, explain how matching of cases and controls was addressed <b>checked</b><br>(e) Describe any sensitivity analyses <b>checked</b> |

Continued on next page

**Results**

|                  |     |                                                                                                                                                                                                                                                                                                                                                                                                                                                            |
|------------------|-----|------------------------------------------------------------------------------------------------------------------------------------------------------------------------------------------------------------------------------------------------------------------------------------------------------------------------------------------------------------------------------------------------------------------------------------------------------------|
| Participants     | 13* | (a) Report numbers of individuals at each stage of study—eg numbers potentially eligible, examined for eligibility, confirmed eligible, included in the study, completing follow-up, and analysed <b>checked</b><br>(b) Give reasons for non-participation at each stage <b>checked</b><br>(c) Consider use of a flow diagram <b>checked</b>                                                                                                               |
| Descriptive data | 14* | (a) Give characteristics of study participants (eg demographic, clinical, social) and information on exposures and potential confounders <b>checked</b><br>(b) Indicate number of participants with missing data for each variable of interest <b>checked</b>                                                                                                                                                                                              |
| Outcome data     | 15* | <i>Cohort study</i> —Report numbers of outcome events or summary measures over time<br><i>Case-control study</i> —Report numbers in each exposure category, or summary measures of exposure <b>checked</b><br><i>Cross-sectional study</i> —Report numbers of outcome events or summary measures                                                                                                                                                           |
| Main results     | 16  | (a) Give unadjusted estimates and, if applicable, confounder-adjusted estimates and their precision (eg, 95% confidence interval). Make clear which confounders were adjusted for and why they were included <b>checked</b><br>(b) Report category boundaries when continuous variables were categorized <b>checked</b><br>(c) If relevant, consider translating estimates of relative risk into absolute risk for a meaningful time period <b>checked</b> |
| Other analyses   | 17  | Report other analyses done—eg analyses of subgroups and interactions, and sensitivity analyses <b>checked</b>                                                                                                                                                                                                                                                                                                                                              |

**Discussion**

|                  |    |                                                                                                                                                                                           |
|------------------|----|-------------------------------------------------------------------------------------------------------------------------------------------------------------------------------------------|
| Key results      | 18 | Summarise key results with reference to study objectives <b>checked</b>                                                                                                                   |
| Limitations      | 19 | Discuss limitations of the study, taking into account sources of potential bias or imprecision. Discuss both direction and magnitude of any potential bias <b>checked</b>                 |
| Interpretation   | 20 | Give a cautious overall interpretation of results considering objectives, limitations, multiplicity of analyses, results from similar studies, and other relevant evidence <b>checked</b> |
| Generalisability | 21 | Discuss the generalisability (external validity) of the study results <b>checked</b>                                                                                                      |

**Other information**

|         |    |                                                                                                                                                                              |
|---------|----|------------------------------------------------------------------------------------------------------------------------------------------------------------------------------|
| Funding | 22 | Give the source of funding and the role of the funders for the present study and, if applicable, for the original study on which the present article is based <b>checked</b> |
|---------|----|------------------------------------------------------------------------------------------------------------------------------------------------------------------------------|

\*Give information separately for cases and controls in case-control studies and, if applicable, for exposed and unexposed groups in cohort and cross-sectional studies.

**Note:** An Explanation and Elaboration article discusses each checklist item and gives methodological background and published examples of transparent reporting. The STROBE checklist is best used in conjunction with this article (freely available on the Web sites of PLoS Medicine at <http://www.plosmedicine.org/>, Annals of Internal Medicine at <http://www.annals.org/>, and Epidemiology at <http://www.epidem.com/>). Information on the STROBE Initiative is available at [www.strobe-statement.org](http://www.strobe-statement.org).

# BMJ Open

## Education Against Tobacco (EAT) - A quasi-experimental prospective evaluation of a programme for preventing smoking in secondary schools delivered by medical students: a study protocol

|                                 |                                                                                                                                                                                                                                                                                                                                                                                                              |
|---------------------------------|--------------------------------------------------------------------------------------------------------------------------------------------------------------------------------------------------------------------------------------------------------------------------------------------------------------------------------------------------------------------------------------------------------------|
| Journal:                        | <i>BMJ Open</i>                                                                                                                                                                                                                                                                                                                                                                                              |
| Manuscript ID:                  | bmjopen-2014-004909.R1                                                                                                                                                                                                                                                                                                                                                                                       |
| Article Type:                   | Protocol                                                                                                                                                                                                                                                                                                                                                                                                     |
| Date Submitted by the Author:   | 27-May-2014                                                                                                                                                                                                                                                                                                                                                                                                  |
| Complete List of Authors:       | Brinker, Titus; Goethe-University, Institute of Occupational Medicine, Social Medicine and Environmental Medicine<br>Stamm-Balderjahn, Sabine; Charité – Universitätsmedizin Berlin, Institute of Medical Sociology<br>Werner, Seeger; Max-Planck Institute for Heart and Lung Research, Groneberg, David; Goethe-University, Institute of Occupational Medicine, Social Medicine and Environmental Medicine |
| <b>Primary Subject Heading</b>: | Smoking and tobacco                                                                                                                                                                                                                                                                                                                                                                                          |
| Secondary Subject Heading:      | Smoking and tobacco, Epidemiology, Public health                                                                                                                                                                                                                                                                                                                                                             |
| Keywords:                       | smoking prevention, schools, tobacco prevention, medical students, adolescent smoking, school-based prevention                                                                                                                                                                                                                                                                                               |
|                                 |                                                                                                                                                                                                                                                                                                                                                                                                              |

SCHOLARONE™  
Manuscripts

Only

1  
2  
3  
4  
5 **Education Against Tobacco (EAT) - A quasi-experimental prospective**  
6  
7 **evaluation of a programme for preventing smoking in secondary schools**  
8  
9 **delivered by medical students: a study protocol**  
10  
11

12  
13  
14 Titus J. Brinker<sup>1\*</sup>, Sabine Stamm-Balderjahn<sup>2</sup>, Werner Seeger<sup>3</sup>, David A. Groneberg<sup>1</sup>  
15  
16

17  
18 <sup>1</sup> Institute of Occupational Medicine, Social Medicine and Environmental  
19  
20  
21  
22  
23  
24  
25  
26  
27  
28  
29  
30  
31  
32  
33  
34  
35  
36  
37  
38  
39  
40  
41  
42  
43  
44  
45  
46  
47  
48  
49  
50  
51  
52  
53  
54  
55  
56  
57  
58  
59  
60  
Institute of Occupational Medicine, Social Medicine and Environmental  
Medicine, Goethe-University, 60590 Frankfurt, Germany

<sup>2</sup> Institute of Medical Sociology, Charité – Universitätsmedizin Berlin,  
Luisenstraße 13 A, 10117 Berlin, Germany

<sup>3</sup> Max-Planck Institute for Heart and Lung Research, 61231 Bad Nauheim,  
Germany

E-mail: titus.brinker@gmail.com (TJB), sabine.stamm-balderjahn@charite.de (SS-B),  
werner.seeger@mpi-bn.mpg.de (WS), arbsozmed@uni-frankfurt.de (DAG)

\* Address for correspondence: Titus Brinker, Institute of Occupational Medicine,  
Social Medicine and Environmental Medicine, Goethe-University, 60590 Frankfurt,  
Email: titus.brinker@gmail.com

**ABSTRACT**

*Background:* A survey conducted by the German Federal Centre for Health Education in 2012 showed that 35.2% of all young adults (18 to 25 years) and 12.0% of all adolescents (12 to 17 years) in Germany are regular cigarette smokers. Most consumed their first cigarette in early adolescence. We recently reported a significantly positive short-term effect of a physician-delivered school-based smoking prevention programme on the smoking behaviour of school children in Germany. However, physician-based programmes are usually very expensive. Therefore, we will evaluate and optimize Education against Tobacco (EAT), a widespread, low-cost programme delivered by about 400 medical students from 16 universities in Germany.

*Methods and analysis:* Prospective quasi-experimental study design with two measurements at baseline (t1) and 6 months post-intervention (t2) to investigate an intervention in 10- to 15-year-olds in grades six to eight at German secondary schools. The intervention programme consists of two 60-minute school-based medical-student delivered modules with (module 1) and without the involvement of patients with tobacco-related diseases and control groups (no intervention). The study questionnaire measuring smoking status (water pipe and cigarette smoking), smoking-related cognitions, and gender, social and cultural aspects was designed and pre-tested in advance. The primary endpoint is the percentage difference between smokers and non-smokers in the two study arms at baseline and 6 months after the intervention. The percentage of former smokers and new smokers in the two groups and the measures of smoking behaviour will be studied as secondary outcome measures.

1  
2  
3 *Ethics and dissemination:* In accordance with Good Epidemiologic Practice (GEP)  
4 guidelines, the study protocol was submitted for approval by the responsible ethics  
5 committee, which decided that the study does not need ethical approval (Goethe  
6 University, Frankfurt-Main, Germany). Findings will be disseminated in peer-reviewed  
7 journals, at conferences, within our scientific advisory board and through medical  
8 students within the EAT project.  
9  
10  
11  
12  
13  
14  
15  
16  
17  
18

### 19 **Strengths and limitations of this study**

- 20  
21 • No medical student-delivered school-based tobacco prevention programme  
22 has been evaluated for its primary preventive effect to date.
- 23  
24 • It is imperative to sensitize prospective physicians to tobacco prevention.
- 25  
26 • The quasi-experimental design of this study might cause a selection bias due  
27 to the lack of randomization.
- 28  
29 • Cluster effects cannot be excluded entirely as the control classes are located  
30 in the same schools and pupils could exchange what they have learned.
- 31  
32 • As our research is not multi-national, it might not be useful for persons of all  
33 ethnic and cultural backgrounds.
- 34  
35 • Because our study relies on self-reports obtained from adolescents via a  
36 questionnaire for data collection, there is a risk that the actual prevalence of  
37 smoking may be different from the reported prevalence, e.g. due to social  
38 desirability bias.
- 39  
40 • Our follow-up data is only collected six months after the intervention due to  
41 organisational reasons. Thus, we will not be able to determine which effects  
42 the intervention might have at one year follow-up.  
43  
44  
45  
46  
47  
48  
49  
50  
51  
52  
53  
54  
55  
56  
57  
58  
59  
60

## Background

Tobacco consumption is a risk factor for various diseases and leads to the highest number of avoidable deaths worldwide [1]. Despite warning labels and public interventions, smoking was responsible for almost 107,000 deaths in Germany alone in 2007 [2]. There are high costs associated with smoking. One study estimated the smoking-related costs for acute hospital care, inpatient rehabilitation care, ambulatory care and prescription drugs in Germany to be EUR 7.5 billion in 2003 [3].

Most smokers started smoking in early adolescence [4]. In a survey conducted by the German Federal Centre for Health Education (BZgA) in 2012, 35.2% of all young adults (18 to 25 years) and 12.0% of all adolescents (12 to 17 years) in Germany described themselves as regular cigarette smokers [5]. A 2006 survey that quantified nicotine dependence in Germany using the Fagerström test [6] reported that 50.8% of the 15- to 17-year-old smokers and 41.8% of the 18- to 24-year-old smokers were dependent on nicotine. Laucht and Schmid [7] reported a correlation between the number of cigarettes smoked by 15-year-olds and the starting age of smoking; moreover, those adolescents who had started smoking earlier in life were more likely to be still consuming tobacco and to consume more cigarettes and have a higher degree of dependence than their peers.

Furthermore, the use of water pipes has increased in the past few years [8].

According to a 2011 survey by the Federal Centre for Health Education, 8.7% of adolescents and 11.2% of young adults surveyed had smoked water pipe at least once in the 30 days leading up to the survey [8]. Male respondents smoked water pipe more frequently than women [8]. According to Maziak, water pipes lead the way to cigarette smoking and have similarly deleterious effects on human health [9]. Early primary prevention of smoking is thus of crucial importance and should be promoted,



1  
2  
3 evaluated and optimized.  
4

5  
6 Some scientifically validated smoking prevention programmes already exist in  
7  
8 Germany, like the Smoke-Free Class (SFC) competition, which was shown to have a  
9  
10 significant primary preventive long-term effect and cost-effectiveness [10, 11].

11  
12 However, the SFC competition focuses only on cigarettes and not on water pipe  
13  
14 smoking. In addition, there is no comparable beneficial effect for the instructors of the  
15  
16 SFC programme. Education Against Tobacco additionally sensitizes prospective  
17  
18 physicians to the importance of tobacco prevention. A recent study from Yale  
19  
20 University suggests that tobacco addiction is undertreated by physicians in  
21  
22 comparison to other chronic conditions [12]. The authors concluded that alternative  
23  
24 models of engagement may be needed to enhance use of effective treatments for  
25  
26 tobacco addiction and to raise awareness among physicians.  
27  
28  
29

30  
31 To our knowledge, medical student delivered school-based programmes for  
32  
33 preventing smoking have not been evaluated to date. Little relevant data is available  
34  
35 in scientific databases such as Medline or PubMed. The most relevant publication on  
36  
37 the topic is the Cochrane Database Analysis on school-based programmes for  
38  
39 preventing smoking [13]. The authors analyzed the data from 134 studies in 25  
40  
41 different countries in a total of 428,293 young people aged 5 to 18. Forty-nine of  
42  
43 these studies reported smoking behaviour in adolescents who had never previously  
44  
45 smoked. No overall effect of intervention curricula vs. control was found based on the  
46  
47 pooled results at follow-up at one year or less (odds ratio [OR] 0.94, 95% confidence  
48  
49 interval [CI] 0.85 to 1.05) [13]. From our perspective, the most relevant finding of the  
50  
51 Cochrane Analysis is that social competence and social influence curricula have a  
52  
53 statistically significant effect of preventing the onset of smoking [13]. The authors  
54  
55 concluded that further research is required to design and test programmes that will  
56  
57  
58  
59  
60

1  
2  
3 be equally effective for people of different genders, cultural backgrounds and ethnic  
4  
5 groups. Interventions delivered by adult educators were shown to be more effective  
6  
7 in the longer term than peer-education programmes. Medical students belong to the  
8  
9 group of adult educators. According to the Cochrane Analysis, cost-effectiveness  
10  
11 plays an important role in practical implementation. As Education against Tobacco is  
12  
13 delivered by medical student volunteers, it is less expensive and more available than  
14  
15 physician-delivered programmes.  
16  
17

18  
19 Secondary school programmes which involve physicians as health educators already  
20  
21 exist. In fact, Stamm-Balderjahn et al. [14] recently published data on a school-based  
22  
23 physician-delivered programme (Students in the Hospital) in Berlin, which achieved  
24  
25 significant positive results with a multimodal approach .From September 2007 to July  
26  
27 2008, they conducted an anonymous questionnaire survey with a quasi-experimental  
28  
29 control group design two weeks before (t1) and six months after (t2) the intervention  
30  
31 in a group of 760 participating school students in Berlin. The results indicated that  
32  
33 40.8% of the participants were smokers at baseline, 79% of whom stated that they  
34  
35 also smoked water pipes. Regarding the primary prevention outcome of the study, it  
36  
37 was found that significantly fewer students in the intervention group began smoking  
38  
39 within six months of the intervention than in the control group ( $p < 0.001$ ). In addition,  
40  
41 the chance of remaining a non-smoker was four times higher in the intervention  
42  
43 group (OR, 4.14; CI, 1.66–10.36). Concerning gender, girls appeared to benefit more  
44  
45 from the intervention than boys (OR 2.56, CI 1.06–6.19). 16.1% of smokers in the  
46  
47 intervention group and 17.6% in the control group stopped smoking ( $p > 0.05$ ). A  
48  
49 primary preventive effect of the programme was clearly and conclusively  
50  
51 demonstrated.  
52  
53  
54  
55  
56  
57

58 Non-smoking is Cool (NiC), another physician-delivered programme based in  
59  
60

1  
2  
3 Hamburg, Germany, addresses grades 5 to 6 of all secondary school types (total  
4 sample size reported: 1359 students) [15]. The programme uses a social influence-  
5 and fear-based curriculum. Multiple studies have shown that fear-based appeals are  
6 ineffective for primary tobacco prevention in the long term [16]. NiC proved to be  
7 effective in grammar schools, where it reduced the onset of smoking in the  
8 intervention group by 50% compared to the control group at three and nine months  
9 follow-up, but with a small effect size [17]. Nevertheless, it failed to show a significant  
10 primary preventive effect in schools with a lower educational level (general,  
11 intermediate, or comprehensive school) [17].  
12  
13  
14  
15  
16  
17  
18  
19  
20  
21  
22  
23

24 Considering the high cost of physician-based programmes and the lack of available  
25 physicians, it is indicated to evaluate a less expensive and widespread programme  
26 that sensitizes prospective physicians to tobacco prevention.  
27  
28  
29  
30  
31

### 32 **School-based smoking prevention programme delivered by medical students**

33  
34 Education Against Tobacco (EAT) is a non-profit, medical student-delivered school-  
35 based smoking prevention programme founded in August 2011 by Titus Brinker, a  
36 medical student at the University of Gießen, and developed in cooperation with  
37 professors from the Universities of Gießen, Frankfurt and Marburg as well as medical  
38 students from Texas A&M University. The programme takes the Cochrane Analysis  
39 into account [18]. Its mission is to focus on the development of low-cost prevention  
40 programmes and their implications for research, and to combine social influences  
41 approaches with generic social competence approaches. Both of these key points  
42 were taken into account when developing the curriculum. At the time of development,  
43 there was already research available that encouraged the use of medical students in  
44 such programmes. For example, Sussman et al. [19] concluded that health educator-  
45 led drug prevention programmes are more effective than self-instructed programmes.  
46  
47  
48  
49  
50  
51  
52  
53  
54  
55  
56  
57  
58  
59  
60

1  
2  
3 Since physician-based programmes have proven to be successful [14] but usually  
4 are very expensive, we aimed to evaluate and optimize Education Against Tobacco,  
5 a widespread low-cost programme which is being delivered by about 400 medical  
6 students at 16 universities in Germany. It costs only about EUR 25 per participating  
7 class. The city of Gießen, home of the largest EAT group with the highest level of  
8 experience and the most participating EAT schools, is an adequate platform to  
9 evaluate the effects of EAT.  
10  
11  
12  
13  
14  
15  
16  
17  
18  
19

## 20 Objectives

- 21  
22  
23 1) To assess the efficacy of the programme, we investigated two main questions:  
24 a. Does the EAT programme help non-smokers to remain abstinent?  
25 b. Does the EAT programme encourage smokers to take steps to stop  
26 smoking?  
27  
28  
29  
30  
31 2) To assess whether the programme is equally effective for participants of  
32 different gender, social and cultural backgrounds, we investigated the  
33 questions:  
34 a. Is the EAT programme equally effective for both genders?  
35 b. Is the EAT programme equally effective for different school types?  
36 c. Is the EAT programme equally effective for different cultural  
37 backgrounds?  
38  
39  
40  
41  
42  
43  
44  
45

## 46 Methods

### 47 Intervention

48  
49  
50 The programme consists of two 60-minute modules. The first part is presented by  
51 two to six medical students and a patient with a tobacco-related disease to all pupils  
52 at the same time inside a large room within the school. It consists of an interactive  
53  
54  
55  
56  
57  
58  
59  
60

1  
2  
3 PowerPoint presentation in which the participants are encouraged to make their own  
4 well-informed decisions and receive relevant knowledge on handling confrontations  
5 with their peers (social competence approach). The university hospital patient with a  
6 smoking-related disease is interviewed about his reasons to start smoking and the  
7 influence tobacco consumption had on his life. The participants are encouraged to  
8 ask the patient questions. The second part takes place in an interactive classroom  
9 setting in which two medical students (usually a male and a female) tutor one class.  
10 Both modules focus on educating adolescents about the strategies of the tobacco  
11 industry to influence their decision in a non-objective manner (social influence) and  
12 on peer pressure (social influence), decision-making and skills for coping with  
13 challenges in their life in a healthy way (social competence). The participants also  
14 discuss information relevant for their age group, e.g., why non-smokers look usually  
15 more attractive, have more money to buy things, or are in better physical shape. The  
16 programme focuses on not scaring but educating its participants in an interactive  
17 manner. EAT uses a combined social influences and social competences approach,  
18 which was described as the most effective approach in the recently published  
19 Cochrane Analysis [13].  
20  
21  
22  
23  
24  
25  
26  
27  
28  
29  
30  
31  
32  
33  
34  
35  
36  
37  
38  
39  
40  
41  
42  
43  
44

## 45 **Study design and setting**

### 46 47 **Design**

48  
49  
50  
51 The survey is designed as a quasi-experimental prospective evaluative study with  
52 two measurements (baseline and 6 months post-intervention). The planned study  
53 period is October 2013 until July of 2014. Participants in two study groups  
54  
55  
56  
57  
58  
59  
60

1  
2  
3 (intervention and control groups) will be questioned up to 2 weeks in advance of the  
4  
5 intervention (t1) and 6 months thereafter (t2) (see Figure 1).  
6  
7

8  
9 Randomization could not be performed due to the tremendous organizational and  
10  
11 personal effort required for it. Some classes refused to participate when informed that  
12  
13 they would be control groups. To keep confounding factors to a minimum, a parallel  
14  
15 class in a given grade was selected as the control group. All participating schools  
16  
17 were asked in advance to split their grades into two class-groups with the same  
18  
19 performance levels. Schools that did not agree to the splitting procedure were  
20  
21 excluded. A parallel class is defined as a control class in the same grade as the  
22  
23 intervention class, with the same performance level as the intervention class, and  
24  
25 attending the same school as the intervention class. All intervention classes had  
26  
27 parallel classes. We chose to do the follow-up at six months so that the control group  
28  
29 could receive the intervention in the same school year (after data collection was  
30  
31 completed). This made it easier for us to convince schools to participate.  
32  
33  
34  
35

### 36 **Data collection**

37  
38  
39 A written survey questionnaire is used for the collection of the data. The  
40  
41 questionnaire was developed to collect data at both time points (t1-t2). In addition to  
42  
43 the socio-demographic data (age, gender, school type), it will capture the smoking  
44  
45 status of the school students concerning water pipe and cigarette consumption. To  
46  
47 maximize the external validity of the intervention, the questionnaires will be placed in  
48  
49 envelopes which are instantly being sealed by the responsible class teachers  
50  
51 immediately after completion.  
52  
53  
54

### 55 **Data management and analysis**

1  
2  
3 The envelopes will be opened and data analysis performed under the supervision of  
4  
5 Prof. Dr. Groneberg at the Goethe University of Frankfurt. The class teachers will  
6  
7 individually supervise their classes during the completion of the questionnaire.  
8  
9

10  
11 The questionnaire contains numerous items which have already been included in  
12  
13 similar investigations. The questions about the smoking status and the frequency of  
14  
15 smoking refer to the evaluation of the school-based smoking prevention programmes  
16  
17 in Heidelberg entitled “Ohne Kippe” (No Butts) [20] and in Berlin entitled “Students in  
18  
19 the hospital” [14] as well as to the results of the KiGGs child and adolescent surveys  
20  
21 published by Lampert and Thamm [21].  
22  
23

24  
25  
26  
27 To test the questionnaire in accordance to the GEP guidelines [22], we distributed 88  
28  
29 copies to pupils with the lowest education level in May 2013. 85 of the completed  
30  
31 questionnaires were deemed as a useful way for evaluation, but seven had not been  
32  
33 filled out completely. Therefore, we added a note to turn the page at the bottom of  
34  
35 each page to fix this problem.  
36  
37

## 38 39 **Participants and sample size**

### 40 41 *Eligibility criteria*

42  
43  
44  
45  
46 Students aged 10 to 15 attending grades six to eight of a secondary general,  
47  
48 intermediate, grammar, or comprehensive school are eligible. Older or younger  
49  
50 students or students from other school types are not. Schools in Gießen and the  
51  
52 surrounding area already participate in the programme each year. They know that  
53  
54 participation is voluntary and can be ended at any time without giving a reason. The  
55  
56  
57  
58  
59  
60

1  
2  
3 geographical area concerned (Gießen and surrounding villages) was informed about  
4  
5 the study via the Hessian Ministry of Education and Cultural Affairs.  
6  
7

### 8 9 *Legal approval*

10  
11 In accordance with Good Epidemiologic Practice (GEP) guidelines [22], the study  
12  
13 protocol was submitted for approval by the responsible ethics committee, which  
14  
15 decided that the study does not need ethical approval (ethics committee of Goethe  
16  
17 University, Frankfurt-Main, Germany). All legal and data protection issues were  
18  
19 discussed with the responsible authority, the Ministry of Education and Cultural  
20  
21 Affairs in Germany, which approved the proposed data collection within the  
22  
23 participating schools. In addition, each school individually discussed and approved  
24  
25 the study at a school conference. It was explained to each student that participation  
26  
27 is voluntarily, and informed written consent was obtained from the parents of the  
28  
29 study participants.  
30  
31  
32  
33

### 34 35 *Sample Size Calculation*

36  
37 As there is no other evaluated school-based programme delivered by medical students, our  
38  
39 study has an explorative character. Still, we decided to calculate the sample size (using the  
40  
41 programme BiAS for Windows) on the basis of a recently published study which evaluated  
42  
43 the “Non-smoking is Cool” school-based physician delivered programme in Hamburg [17].  
44  
45 To calculate the sample based on effect size requirements, we used the difference in the  
46  
47 number of persons who started smoking within nine months between the intervention and  
48  
49 control group at grammar schools investigated in the reference study (6.4% in the  
50  
51 intervention group vs. 12% in the control group yields a difference of 5.6%) [15]. We  
52  
53 decided to use the method of Sack et al. for our calculations because “Students in the  
54  
55 Hospital” mainly included school types with a lower educational level. We used the rates for  
56  
57  
58  
59  
60



1  
2  
3 grammar school students, who will be the largest group of participants in our study. Thus,  
4  
5 we calculated that the required sample size is 435 pupils per group (870 total), plus the loss  
6  
7 to follow-up group at a test power of 80% ( $\alpha = 0.05$ ). We took into account the loss to  
8  
9 follow-up effect of “Students in the Hospital” (17,8%), which increased our group size to  $n_1 =$   
10  
11 514 and  $n_2 = 514$  (total: 1028) [14].  
12

13  
14  
15 (Figure1.tiff (stored seperately))  
16

### 17 18 19 **Gender specific aspects**

20  
21 Our recent study using the physician-based approach for school-based tobacco  
22  
23 prevention [14] showed that girls benefit from physician-delivered programmes more  
24  
25 than boys (OR 2.56, CI 1.06–6.19). We aim to assess whether this effect is also  
26  
27 observed using the EAT medical student-based approach. If so, the programme will  
28  
29 be modified for gender mainstreaming since both sexes need to be addressed  
30  
31 equally.  
32  
33  
34  
35

### 36 37 38 **Cultural aspects**

39  
40 We hypothesize that there will be a small but significant relation between water pipe  
41  
42 smoking and cultural background since water pipe use is traditional in the Middle  
43  
44 East region [23]. Therefore, we plan to collect data on the cultural background of the  
45  
46 students. Comprehensive information about water pipe smoking is an integral  
47  
48 component of the EAT programme. Within the proposed optimization process, the  
49  
50 EAT curriculum can be tailored to the different school populations (e.g., schools with  
51  
52 or without a high percentage of pupils with a migration background) as needed.  
53  
54

### 55 56 57 **Social aspects**

1  
2  
3 According to a survey conducted by the Federal Centre for Health Education [5], the  
4 prevalence of cigarette smoking in 10- to 15-year-olds in Germany was significantly  
5 higher in schools with lower education levels in 2012 (16.7% vs. 6.9%).  
6  
7

8  
9  
10 Consequently, we plan to specifically address schools with lower education levels  
11 and to compare the effects of the intervention on different school types.  
12  
13

### 14 15 16 17 18 **Outcomes**

19  
20  
21 The primary endpoint is the percentage difference between smokers and non-  
22 smokers in the two study arms at baseline and 6 months after the intervention  
23 (lifetime prevalence). The percentage of former smokers and new smokers in the two  
24 groups and the measures of smoking behaviour (the number of cigarettes and water  
25 pipes smoked on a daily, weekly or monthly basis) will be studied as secondary  
26 outcome measures.  
27  
28  
29  
30  
31  
32  
33  
34  
35

### 36 **Statistical analysis**

37  
38 In order to examine baseline differences of pupils' characteristics in our quasi-  
39 experimental design we will use  $\chi^2$ -tests for the categorical variables and t-tests for  
40 continuous variables. There must be no significant differences between the two study  
41 groups at baseline (t1). The effects of predictors on the smoking behaviour after six  
42 months (t2) will be calculated by logistic regression analysis, a state-of-the-art  
43 technique for the evaluation of the effectiveness of prevention programmes [20, 24,  
44 25] in longitudinal studies. The significance level is 5% for t-tests (double-sided) and  
45 95% for confidence intervals (double-sided). The statistical analysis will be performed  
46 using the newest version of SPSS Statistics for Mac by IBM.  
47  
48  
49  
50  
51  
52  
53  
54  
55  
56  
57  
58  
59  
60

## Discussion

### Strengths and limitations

No evaluation of a medical student-delivered school-based tobacco prevention programme is available to date. It is imperative to sensitize prospective physicians to tobacco prevention [12]. An additional aim of this study is to evaluate whether a medical student-delivered smoking prevention program has preventive effects on the smoking behaviour of secondary school pupils in Germany. The data from this study will provide a sound basis for optimizing the Education Against Tobacco curriculum to make it optimally effective for different target groups. A promising factor of the EAT programme is that it uses a combined social influence and social competence approach, which was been shown to be effective in the recently published Cochrane Analysis [13].

Our study has a quasi-experimental design. The main problem of this kind of study is selection bias due to the lack of randomization. To minimize this problem, we will match the intervention classes with parallel control classes (same grade and school), which corresponds to the matching procedure in field experiments.

As the intervention and control groups attend the same schools, the pupils could exchange what they learn about smoking in the intervention during school breaks. Therefore cluster effects cannot be excluded entirely.

Also, as our research is not multi-national, it might not be useful for persons of all ethnic and cultural backgrounds.

Because our study relies on self-reports obtained from adolescents via a questionnaire for data collection, there is a risk that the actual prevalence of smoking may be different from the reported prevalence, e.g. due to social desirability bias.

1  
2  
3 This bias can only be excluded by using expensive methods like testing for cotinine  
4 (a metabolite of nicotine) in the saliva, blood or urine of the students. Other  
5 alternatives described by Ketala et al. (2004) include the measurement of  
6 thiocyanate in saliva or carbon monoxide in exhaled air [26]. This group reported  
7 95% agreement between the results of these biochemical tests and the results of  
8 questionnaires. Conversely, Connor Gorber et al. (2009) found high differences  
9 between biochemically assessed and self-reported smoking status in pregnant  
10 women and patients with tobacco-related diseases [27]. In our study, there might be  
11 social desirability bias in both study groups, which might make the intervention look  
12 less effective than it actually is:  
13  
14  
15  
16  
17  
18  
19  
20  
21  
22  
23  
24

25  
26 The first measurement at baseline occurs while the intervention group is anticipating  
27 the intervention. Therefore, more intervention group students might feel compelled to  
28 behave in a socially desirable way and falsely declare that they are non-smokers. In  
29 contrast, the control group students know that they will not see the medical students  
30 again anytime soon, so they might be inclined to answer more honestly to the items  
31 on the questionnaire. At the second measurement time point, the situation is  
32 reversed: Because the intervention group students know that the medical students  
33 will not come back, they might feel less social desirability pressure and be more likely  
34 to admit that they are smokers. In contrast, the control group students will be  
35 awaiting the next intervention in the coming weeks, so they might reply to the  
36 questionnaires in a more socially desired way (declaring that they are non-smokers  
37 even if they smoke).  
38  
39  
40  
41  
42  
43  
44  
45  
46  
47  
48  
49  
50  
51  
52

53  
54 Consequently, the study could be compromised by social desirability bias at both  
55 time points, which could make the intervention look less effective.  
56  
57  
58  
59  
60

1  
2  
3 In order to measure the long-term effects of school-based programmes, follow-up  
4 data is usually collected six months and one year after an intervention. However, we  
5 will only be able to collect data six months post-intervention because the schools  
6 insisted on us providing an intervention for the control group in the same school year.  
7 Thus, we will not be able to determine which effects the intervention might have at  
8 one year follow-up.  
9  
10  
11  
12  
13  
14  
15

## 16 17 **Conclusion**

18  
19 We expect that our research will find general acceptance because the investigated  
20 programme provides many medical students and even more medical interns (e.g., in  
21 the elective period known) a great opportunity to deliver prevention programmes not  
22 only in inpatient secondary prevention, but also and in particular in primary  
23 prevention in schools and communities. Health systems worldwide could benefit from  
24 the development of such novel and low-cost primary smoking prevention  
25 programmes.  
26  
27  
28  
29  
30  
31  
32  
33  
34  
35  
36  
37  
38

## 39 **Authors' contributions**

40  
41 TJB contributed to the design and conduct of the study, drafted the manuscript, and  
42 will perform the statistical analysis. WS supports the coordination of the study. SS-B  
43 contributed to the design of the study, participated in the writing process, and  
44 proofread the manuscript. DAG contributed to the design of the study and proofread  
45 the manuscript. All authors read and approved the final manuscript. This study is part  
46 of a thesis project (TJB).  
47  
48  
49  
50  
51  
52  
53  
54  
55

## 56 **Competing interests:**

57  
58 The authors declare that they have no competing interests.  
59  
60

## REFERENCES

1. World Health Organization: **WHO report on the global tobacco epidemic.** [http://whqlibdoc.who.int/publications/2011/9789240687813\\_eng.pdf](http://whqlibdoc.who.int/publications/2011/9789240687813_eng.pdf) 2011.
2. Mons U: **[Tobacco-attributable mortality in Germany and in the German Federal States - calculations with data from a microcensus and mortality statistics].** *Gesundheitswesen* 2011, **73**(4):238-246.
3. Neubauer S, Welte R, Beiche A, Koenig HH, Buesch K, Leidl R: **Mortality, morbidity and costs attributable to smoking in Germany: update and a 10-year comparison.** *Tobacco control* 2006, **15**(6):464-471.
4. Haustein K-O GD: **Tobacco or Health? Physiological and Social Damages Caused by Tobacco Smoking.** In: *Springer 2009.* edn.; 2009.
5. Bundeszentrale für gesundheitliche Aufklärung (BZgA): **Der Tabakkonsum Jugendlicher und junger Erwachsener in Deutschland 2012. (Bericht).** In: *Teilband Rauchen (Bericht).* 2013.
6. Kraus L RS, Baumeister SE, Pabst A, Steiner S: **Epidemiologischer Suchtsurvey 2006. Repräsentativerhebung zum Gebrauch und Missbrauch psychoaktiver Substanzen bei Jugendlichen und Erwachsenen in Berlin.** . In: IFT-Bericht Band 167. München.; 2008.
7. Laucht M, Schmid B: **Früher Einstieg in den Alkohol- und Tabakkonsum – Indikator für eine erhöhte Suchtgefährdung?** *Z Kinder Jugendpsychiatr Psychother* 2007;35: 137–143.
8. Bundeszentrale für gesundheitliche Aufklärung(BZgA) : **Die Drogenaffinität Jugendlicher in der Bundesrepublik Deutschland 2011.** In: *Teilband Rauchen (Bericht).* 2012.
9. Maziak W: **The global epidemic of waterpipe smoking.** *Addictive behaviors* 2011, **36**(1-2):1-5.
10. Isensee B, Morgenstern M, Stoolmiller M, Maruska K, Sargent JD, Hanewinkel R: **Effects of Smokefree Class Competition 1 year after the end of intervention: a cluster randomised controlled trial.** *Journal of epidemiology and community health* 2012, **66**(4):334-341.
11. Hoeflmayr D, Hanewinkel R: **Do school-based tobacco prevention programmes pay off? The cost-effectiveness of the 'Smoke-free Class Competition'.** *Public health* 2008, **122**(1):34-41.
12. Bernstein SL, Yu S, Post LA, Dziura J, Rigotti NA: **Undertreatment of tobacco use relative to other chronic conditions.** *American journal of public health* 2013, **103**(8):e59-65.
13. Thomas RE, McLellan J, Perera R: **School-based programmes for preventing smoking.** *The Cochrane database of systematic reviews* 2013, **4**:CD001293.
14. Stamm-Balderjahn S, Groneberg DA, Kusma B, Jagota A, Schonfeld N: **Smoking prevention in school students: positive effects of a hospital-based intervention.** *Deutsches Arzteblatt international* 2012, **109**(44):746-752.
15. Sack P-M, Hampel J, Bröning S, Petersen KU, Andritzky B, Laack E, Thomasius R: **Was limitiert schulische Tabakprävention?** *Prävention und Gesundheitsförderung* 2013, **8**(4):246-251.
16. Springfield IPF: **Ineffectiveness of Fear Appeals in Youth Alcohol, Tobacco and Other Drug (ATOD) Prevention.** *Prevention First (2008)* 2008.

17. Sack P-M, Hampel J, Bröning S, Petersen KU, Andritzky B, Andritzky B, Laack E, Thomasius R: **Was limitiert schulische Tabakprävention?** *Prävention und Gesundheitsförderung* 2013, **8**(4):246-251.
18. Thomas R, Perera R: **School-based programmes for preventing smoking.** *The Cochrane database of systematic reviews* 2006(3):CD001293.
19. Sussman S SP, McCuller WJ, Dent CW: **Project Towards No Drug Abuse: two-year outcomes of a trial that compares health educator delivery to self-instruction.** 2003.
20. Maier B, Bau AM, James J, Gorgen R, Graf C, Hanewinkel R, Martus P, Maschewsky-Schneider U, Muller MJ, Plachta-Danielzik S *et al*: **Methods for evaluation of health promotion programmes. Smoking prevention and obesity prevention for children and adolescents.** *Bundesgesundheitsblatt, Gesundheitsforschung, Gesundheitsschutz* 2007, **50**(7):980-986.
21. Lampert T, Thamm M: **[Consumption of tobacco, alcohol and drugs among adolescents in Germany. Results of the German Health Interview and Examination Survey for Children and Adolescents (KiGGS)].** *Bundesgesundheitsblatt, Gesundheitsforschung, Gesundheitsschutz* 2007, **50**(5-6):600-608.
22. Deutsche Arbeitsgemeinschaft für Epidemiologie: **Leitlinien und Empfehlungen zur Sicherung von Guter Epidemiologischer Praxis (GEP).** *BMBF Gesundheitsforschung*: [http://www.gesundheitsforschung-bmbf.de/media/Empfehlungen\\_GEP.pdf](http://www.gesundheitsforschung-bmbf.de/media/Empfehlungen_GEP.pdf) 2004.
23. Akl EA, Gunukula SK, Aleem S, Obeid R, Jaoude PA, Honeine R, Irani J: **The prevalence of waterpipe tobacco smoking among the general and specific populations: a systematic review.** *BMC public health* 2011, **11**:244.
24. Pbert L, Flint AJ, Fletcher KE, Young MH, Druker S, DiFranza JR: **Effect of a pediatric practice-based smoking prevention and cessation intervention for adolescents: a randomized, controlled trial.** *Pediatrics* 2008, **121**(4):e738-747.
25. Sloboda Z, Stephens RC, Stephens PC, Grey SF, Teasdale B, Hawthorne RD, Williams J, Marquette JF: **The Adolescent Substance Abuse Prevention Study: A randomized field trial of a universal substance abuse prevention program.** *Drug and alcohol dependence* 2009, **102**(1-3):1-10.
26. Kentala J, Utriainen P, Pahkala K, Mattila K: **Verification of adolescent self-reported smoking.** *Addictive behaviors* 2004, **29**(2):405-411.
27. Connor Gorber S, Schofield-Hurwitz S, Hardt J, Levasseur G, Tremblay M: **The accuracy of self-reported smoking: a systematic review of the relationship between self-reported and cotinine-assessed smoking status.** *Nicotine & tobacco research : official journal of the Society for Research on Nicotine and Tobacco* 2009, **11**(1):12-24.

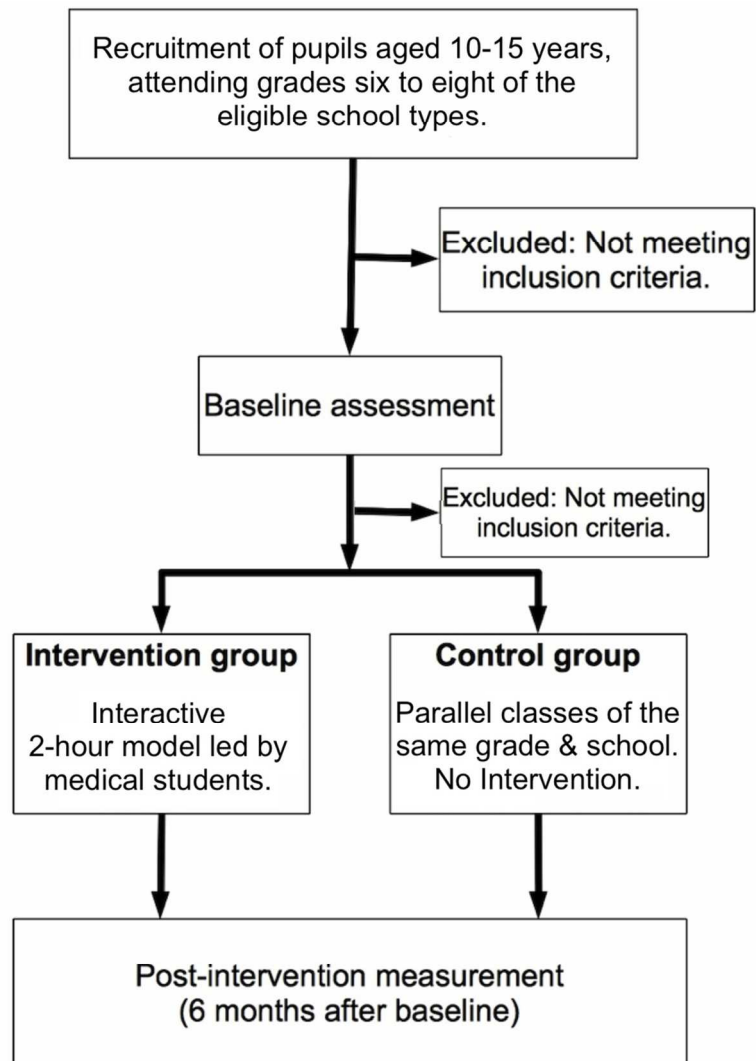

**Figure 1**  
**Study design.**

87x124mm (300 x 300 DPI)



1  
2  
3  
4  
5  
6  
7  
8  
9  
10  
11  
12  
13  
14  
15  
16  
17  
18  
19  
20  
21  
22  
23  
24  
25  
26  
27  
28  
29  
30  
31  
32  
33  
34  
35  
36  
37  
38  
39  
40  
41  
42  
43  
44  
45  
46  
47  
48  
49  
50  
51  
52  
53  
54  
55  
56  
57  
58  
59  
60

**Education ~~Against-against~~ Tobacco (EAT) - A quasi-experimental prospective  
eEvaluation of a school-based program for preventing smoking in secondary  
schools delivered by medical students: a study protocol**

Titus J. Brinker<sup>1\*</sup>, Sabine Stamm-Balderjahn<sup>2</sup>, Werner Seeger<sup>3</sup>, David A. Groneberg<sup>1</sup>

<sup>1</sup> Institute of Occupational Medicine, Social Medicine and Environmental  
Medicine, Goethe-University, 60590 Frankfurt, Germany

<sup>2</sup> Institute of Medical Sociology, Charité – Universitätsmedizin Berlin,  
Luisenstraße 13 A, 10117 Berlin, Germany

<sup>3</sup> Max-Planck Institute for Heart and Lung Research, 61231 Bad Nauheim,  
Germany

E-mails: titus.brinker@gmail.com (TJB), sabine.stamm-balderjahn@charite.de (SS-  
B), werner.seeger@mpi-bn.mpg.de (WS), arbsozmed@uni-frankfurt.de (DAG)

\* Author to whom correspondence should be addressed: Titus Brinker, Institute of  
Occupational Medicine, Social Medicine and Environmental Medicine, Goethe-  
University, 60590 Frankfurt, Email: [titus.brinker@gmail.com](mailto:titus.brinker@gmail.com)

Formatted: English (U.S.)

**ABSTRACT**

*Background:* In a survey conducted and published by the Federal Centre for Health Education in Germany in 2012 35.2% of all young adults (18 to 25 years) and 12.0% of all adolescents (12 to 17 years) described themselves as regular cigarette smokers. Most smokers have consumed their first cigarettes in early adolescence. We recently reported a significantly positive short-term effect of a school-based smoking prevention program on the smoking behaviour of school children delivered by physicians in Germany. Since physician-based programs are usually very expensive, we aim to evaluate and optimize the widespread low-cost program “Education against Tobacco“ which is being delivered by about 400 medical students at 16 universities in Germany.

*Methods and analysis:* Prospective quasi-experimental study design with two measurements at baseline (t1) and 6 months post-intervention (t2) to investigate an intervention in 10- to 15-year-olds in grades six to eight at German secondary schools. The intervention programme consists of two 60-minute school-based medical-student delivered modules with (module 1) and without the involvement of patients with tobacco-related diseases and control groups (no intervention).

*Methods/Design:* ~~We perform a quasi-experimental prospective evaluative study including 2 measures (at baseline and 6 months after intervention) prospective case-control study with quasi-experimental design among 10 to 15 year old children of secondary schools in Germany visiting school grades six to eight. The intervention program consists of two medical-student delivered modules within the schools of about 60 minutes duration each. The first module also involves patients with tobacco related diseases. The control group does not receive any intervention.~~

1  
2  
3  
4  
5  
6  
7  
8  
9  
10  
11  
12  
13  
14  
15  
16  
17  
18  
19  
20  
21  
22  
23  
24  
25  
26  
27  
28  
29  
30  
31  
32  
33  
34  
35  
36  
37  
38  
39  
40  
41  
42  
43  
44  
45  
46  
47  
48  
49  
50  
51  
52  
53  
54  
55  
56  
57  
58  
59  
60

The study questionnaire measuring smoking status (water pipe and cigarette smoking), smoking-related cognitions, and gender, social and cultural aspects was designed and pre-tested in advance. The primary endpoint is the percentage difference between smokers and non-smokers in the two study arms at baseline and 6 months after the intervention. The percentage of former smokers and new smokers in the two groups and the measures of smoking behaviour will be studied as secondary outcome measures.

*Ethics and dissemination:* In accordance with Good Epidemiologic Practice (GEP) guidelines, the study protocol was submitted for approval by the responsible ethics committee, which decided that the study does not need ethical approval (Goethe University, Frankfurt-Main, Germany). Findings will be disseminated in peer-reviewed journals, at conferences, within our scientific advisory board and through medical students within the EAT project.

~~To collect the data, we designed and pre-tested a questionnaire measuring the smoking status (water pipe and cigarette smoking), smoking-related cognitions as well as gender, social, and cultural aspects. Data will be collected at baseline and six months post the intervention.~~

~~*Discussion:* This study protocol describes the design of a prospective case-control intervention study that will evaluate the effectiveness of a school-based smoking prevention program delivered by medical students. We expect that a significantly lower number of children will start smoking in the intervention group compared to the control group as a direct result of this intervention. We will optimize the curriculum on the basis of the results of this evaluation to make it optimally effective for both genders and different ethnic groups.~~

**Strengths and limitations of this study**

- No medical student-delivered school-based tobacco prevention programme has been evaluated for its primary preventive effect to date.
- It is imperative to sensitize prospective physicians to tobacco prevention.
- The quasi-experimental design of this study might cause a selection bias due to the lack of randomization.
- Cluster effects cannot be excluded entirely as the control classes are located in the same schools and pupils could exchange what they have learned.
- As our research is not multi-national, it might not be useful for persons of all ethnic and cultural backgrounds.
- Because our study relies on self-reports obtained from adolescents via a questionnaire for data collection, there is a risk that the actual prevalence of smoking may be different from the reported prevalence, e.g. due to social desirability bias.
- Our follow-up data is only collected six months after the intervention due to organisational reasons. Thus, we will not be able to determine which effects the intervention might have at one year follow-up.

Formatted: List Paragraph, Space Before: 6 pt, After: 6 pt, Bulleted + Level: 1 + Aligned at: 0.25" + Indent at: 0.5"

Formatted: Font: (Default) Arial, English (U.K.)

Formatted: English (U.S.)

### **~~Strengths and limitations of this study~~**

~~A consequence of our research is suspected to be the general acceptance that medical students and even more medical interns (PJ-medical students) offer a great opportunity to deliver prevention programs. Therefore, health systems worldwide may largely benefit from the development of a novel and low-cost measure of primary prevention. A main limitation would be the fact that our research is not been done multinationally and therefore might not be representative for every ethnical and cultural background. Futhermore, the case and the control groups were in the same~~

~~schools which is a potential confounding variable as the pupils could exchange what they have learned about smoking due to the intervention during the school breaks.~~

~~**Keywords:** smoking prevention, school-based prevention, primary prevention, medical students, schools, adolescents~~

## Background

Tobacco consumption is a risk factor for various diseases and leads to the highest number of avoidable deaths worldwide [1]. Despite warning labels and public interventions, smoking causes diseases and death in Germany where it was

responsible for almost 107.000 deaths in 2007 [2]. In addition, it generates high

financial costs. ~~A A-study which modelled amounted the costs for acute hospital care, inpatient rehabilitation care, ambulatory care and prescribed drugs caused by smoking in Germany to be 7.5 billion Euro in 2003-of productivity losses due to smoking in Germany for the year 200[3]5 [3] calculated productivity costs of 9.6 billion Euro which were caused by smoking.~~

~~Most smokers started smoking in early adolescence [4]. In a survey conducted and~~

published by the Federal Centre for Health Education (Bundeszentrale für gesundheitliche Aufklärung, BZgA) in Germany in 2012 35.2% of all young adults (18 to 25 years) and 12.0% of all adolescents (12 to 17 years) described themselves as regular cigarette smokers [5]. A survey conducted in 2006 quantified nicotine dependency with the help of the Fagerström test [6]. It reported that 50.8% of the 15– to 17-year-old smokers and 41.8% of those in the 18– to 24-year age group were dependent on nicotine. Laucht and Schmid reported a correlation between the number of cigarettes smoked and the starting age in 15-year-old adolescents [7]. It

Formatted: English (U.S.)

Field Code Changed

Formatted: Font: Arial

Field Code Changed

Formatted: English (U.S.)

1  
2  
3  
4  
5  
6  
7 was demonstrated that the earlier in life they had smoked their first cigarette, the  
8 more likely they were still consuming tobacco, the more cigarettes they were  
9 currently consuming and the higher was their degree of dependence.  
10

11  
12 Furthermore, in the past few years there was an increase in the use of water pipes  
13 [8]. According to a survey conducted by the Federal Centre for Health Education in  
14 2011, 8.7% of adolescents and 11.2% of the participating young adults had smoked  
15 water pipe at least once in the 30 days leading up to the survey [8]. Male  
16 respondents have smoked water pipe more frequently than women [8]. According to  
17 Maziak, water pipes lead the way to cigarette smoking and have similarly deleterious  
18 effects for human health [9].  
19  
20  
21  
22  
23  
24  
25  
26

27 Early primary prevention of smoking is thus of crucial importance and therefore  
28 should be promoted, evaluated and optimized.  
29

30  
31  
32 There are already scientifically evaluated prevention programs in Germany available  
33 like the smokefree class competition (SFC) which has shown a significant primary  
34 preventive long-term effect and cost-effectiveness [10, 11]. However, the SFC  
35 competition focusses on cigarette consumption exclusively and does not include  
36 waterpipe smoking. In addition, there is no comparable beneficiary effect for the  
37 instructors of the SFC program. In contrast, EAT additionally sensitizes prospective  
38 physicians for the importance of tobacco prevention. As a recent study from Yale  
39 University suggests, tobacco addiction is undertreated by physicians in comparison  
40 to other chronic conditions [12]. The authors concluded, that alternate models of  
41 engagement may be needed to enhance use of effective treatments for tobacco  
42 addiction and to rise the awareness among physicians.  
43  
44  
45  
46  
47  
48  
49  
50  
51  
52

53  
54 So far, medical student delivered school-based programmes for preventing smoking  
55  
56  
57  
58  
59  
60

Formatted: Font: (Default) Arial, Font color: Custom Color(RGB(26,24,24))

Formatted: Font: (Default) Arial, Font color: Custom Color(RGB(26,24,24))

Formatted: Font: (Default) Arial, Font color: Custom Color(RGB(26,24,24))

Formatted: Tab stops: Not at 2.17"

1  
2  
3  
4  
5  
6  
7  
8  
9  
10  
11  
12  
13  
14  
15  
16  
17  
18  
19  
20  
21  
22  
23  
24  
25  
26  
27  
28  
29  
30  
31  
32  
33  
34  
35  
36  
37  
38  
39  
40  
41  
42  
43  
44  
45  
46  
47  
48  
49  
50  
51  
52  
53  
54  
55  
56  
57  
58  
59  
60

have not been evaluated. Therefore, only little relevant data is available in scientific databases such as Medline or PubMed. The most relevant publication on the topic is the Cochrane Database Analysis on school-based programs for preventing smoking [13]. The authors analyzed the data from 134 studies, in 25 different countries, which included a total of 428.293 young people aged 5-18. Of these, 49 studies reported smoking behavior in those adolescents who had never previously smoked. No overall effect of intervention curricula vs. control was found from the pooled results at follow-up at one year or less (odds ratio (OR) 0.94, 95% confidence interval (CI) 0.85 to 1.05)[13]. The most relevant main result for our research is that combined social competence and social influence curricula showed a statistically significant effect for preventing the onset of smoking [13]. The authors concluded that further research is required to design and test programs that will be equally effective for both genders, different cultural backgrounds and ethnic groups. Interventions delivered by adult educators were shown to be more effective in the longer term than peer-education programs. In this respect, medical students belong to the group of adult educators. According to the Cochrane Analysis, cost-effectiveness plays an important role for practical implementation. As EAT is delivered by volunteering medical students, it is less expensive but more available than physician delivered programs.

Formatted: Font color: Auto

However, there are already programs for secondary schools available which involve physicians as health educators. In fact, Stamm-Balderjahn et al. recently published data on a school-based physician delivered program in Germany. Within the evaluation of the physician-based program "Students in the Hospital" in Berlin, significant positive results were present for a multimodal approach [14].

An anonymous survey by questionnaire from September 2007 to July 2008 was conducted, with a quasi-experimental control-group design, two weeks before (t1)

1  
2  
3  
4  
5  
6  
7 and six months after (t2) the intervention in a group of 760 participating school  
8 students in Berlin.

9  
10  
11 The results indicated that 40.8% of the participants were smokers at baseline, among  
12 whom 79% stated that they also smoked water pipes. As major primary prevention  
13 outcome of the study, it was found that significantly fewer students in the intervention  
14 group than in the control group began smoking in the six months after the  
15 intervention (p<0.001). In addition, the chance of remaining a non-smoker was four  
16 times as high in the intervention group (OR, 4.14; CI, 1.66–10.36). Concerning  
17 gender aspects, girls appeared to benefit more from the intervention than boys (OR  
18 2.56, CI 1.06–6.19)(1). 16.1% of smokers in the intervention group and 17.6% in the  
19 control group stopped smoking (p>0.05). Conclusively, a clear primary preventive  
20 effect of the program was demonstrated.

21  
22  
23 Another evaluated physician-delivered program is the „non-smoking is cool“ (=NiC)  
24 program based in Hamburg (Germany) addressing grades 5 to 6 of all secondary  
25 school types (total sample size: 1359 students) [15]. The program states to use a  
26 social influence and fear based curriculum. Fear based appeals have multiply been  
27 shown to be ineffective on a long-term basis in the field of primary tobacco  
28 prevention [16]. However, the program has shown to be effective in grammar schools  
29 where it reduced the onset of smoking by 50% in comparism to the control group  
30 after three months and nine months of follow up with a low effect size [17].

31  
32  
33 Nevertheless, in schools with a lower educational level (general, intermediate, or  
34 comprehensive school) it failed to show a significant primary preventive effect [17].

35  
36  
37 Since physician-based programmes are usually very expensive and there is a lack of  
38 available physicians, it is indicated to evaluate a less expensive and widespread  
39 program which sensitizes prospective physicians for tobacco consumption.

Formatted: Tab stops: Not at 2.17"

Formatted: Font: (Default) Arial



## School-based smoking prevention program delivered by medical students

Formatted: Font: Bold, Font color: Auto

The Education against Tobacco program is not associated with "Students in the Hospital".

Formatted: Line spacing: Double

Formatted: English (U.S.)

[12, 18]

### **School-based smoking prevention program**

The registered association „Education ~~against~~ against Tobacco“ (hereinafter referred to as "EAAT") has been founded and developed since August 2011 by medical student Titus Brinker of the University of Gießen in cooperation with professors from the Universities of Gießen, Frankfurt and Marburg as well as fellow students from the Texas A&M University. The program has been developed taking into account the Cochrane ~~Database Systematic Review on school-based programmes for preventing smoking (2006)~~ Analysis [19]~~(13)~~ in regard of its conclusion to focus on the development of low cost prevention programs and its implication for research to combine social influences approaches with generic social competence approaches. Both of these key points have been taken into account when developing the cEAT ~~curriculum~~. At the time of development there was already research available which encouraged EAAT to use medical students as Sussman et al [20] concluded that health educator-led drug prevention programs are more effective than self-instructed programs.

Formatted: Space Before: 0 pt, After: 12 pt, No widow/orphan control, Don't adjust space between Latin and Asian text, Don't adjust space between Asian text and numbers

Since physician-based programs have proven to be successful [14] but usually are very expensive, we aim to evaluate and optimize the widespread low-cost program "~~education~~ Education ~~against~~ against ~~tobacco~~ Tobacco" which is being delivered by about 400 medical students at 16 universities in Germany and ~~only costs~~ 25 Euro

per participating class. The city of Gießen provides an excellent useful platform to evaluate this effect as it homes the largest EAAAT group with the highest experience level and the most participating EAAAT schools.

## Objectives

1) To assess the efficacy of this program, we set out to answer two main questions:

- a. Does the EAT program help nonsmokers to remain abstinent?
- b. Does the EAT program encourage smokers to take steps to give up?

2) To assess if the program is equally effective for participants with different gender,

social and cultural backgrounds. The questions are:

- a. Is the EAT program equally effective for both genders?
- b. Is the EAT program equally effective for different school types?
- c. Is the EAT program equally effective for different cultural backgrounds?

~~In the past years, prevention science has emerged as a research discipline built on the integration of life course development research, community epidemiology, and preventive intervention trials. Our objective is to integrate these aspects in order to promote prevention in the area of tobacco addiction with a focus on low cost widespread programs.~~

~~We plan to evaluate the effect on the smoking behavior of the curriculum being delivered by medical students in order to reach a sound basis for a future, nationwide program. In this connection, we consider gender, social, and cultural aspects of the intervention in order to optimize the curriculum which includes the design of an evidence-based and easy to implement train the trainer EAT program as a consequence of this study by engulfing recent research knowledge on smoking related diseases. By doing this, we plan to improve the education of the health~~

**Formatted:** Font: (Default) Arial, 11 pt, Font color: Black, English (U.S.)

**Formatted:** Numbered + Level: 1 + Numbering Style: 1, 2, 3, ... + Start at: 1 + Alignment: Left + Aligned at: 0.25" + Indent at: 0.5"

**Formatted:** English (U.S.)

**Formatted:** List Paragraph

**Formatted:** Font: (Default) Arial, 11 pt, Font color: Black

**Formatted:** English (U.S.)

**Formatted:** List Paragraph, Space Before: Auto, After: Auto, Line spacing: 1.5 lines, Numbered + Level: 2 + Numbering Style: a, b, c, ... + Start at: 1 + Alignment: Left + Aligned at: 0.75" + Indent at: 1"

1  
2  
3  
4  
5  
6  
7  
8  
9  
10  
11  
12  
13  
14  
15  
16  
17  
18  
19  
20  
21  
22  
23  
24  
25  
26  
27  
28  
29  
30  
31  
32  
33  
34  
35  
36  
37  
38  
39  
40  
41  
42  
43  
44  
45  
46  
47  
48  
49  
50  
51  
52  
53  
54  
55  
56  
57  
58  
59  
60

educators (participating medical students) by the use of additional expert knowledge on the topic. This train the trainer program also sensitizes the medical students—regardless of their future medical specialization—towards the needs of tobacco prevention and thus increases the knowledge on prevention among the future physicians.

Consequently, it is our strategy to perpetuate the program on a national level by developing a system for the integration of EAT into the structure of medical faculties and large teaching hospitals. In this respect, we will customize the project for an integration of EAT into elective courses (Wahlfächer) or cross-sectional areas (Querschnittsbereiche) such as prevention (QB10) or environmental medicine (QB6) at the medical schools of the 16 EAT partner universities.

## Methods

### Intervention

The program consists of two parts of 60 minutes duration each. The first part is presented by at least two medical students (up to six) and a patient with a tobacco related disease in front of all pupils at the same time inside a large room within the school. It consists of an interactive powerpoint presentation in which the participants are reinforced to take exclusively their own well-informed decisions while providing them with relevant knowledge for confrontations with their peers (social competence approach). In addition, a patient from the university hospital with a smoking related disease is being interviewed about his reasons to start smoking and the influence tobacco consumption had on his life. The participants are encouraged to ask their own questions to the patient. The second part takes place in an interactive class

1  
2  
3  
4  
5  
6  
7 room setting with two medical students tutoring one class (usually a male and a  
8 female). Both parts educate the adolescents about the strategies of the tobacco  
9 industry to influence their decision in an unobjectice manner (social influence), about  
10 peer pressure (social influence), decision making and about skills how they can deal  
11 with challenges in their life in a healthy way (social competence). In addition, the  
12 participants discuss relevant information for their age group e.g. why nonsmokers  
13 look usually more attractive, have more money to buy things or are in better shape  
14 for physical education. The program focusses on not scaring but educating its  
15 participants in an interactive manner. Consequently, the EAT program uses a  
16 combined social influences and social competences curriculum which has been  
17 shown to be the most effective approach in the recently published Cochrane Analysis  
18 [13].  
19  
20  
21  
22  
23  
24  
25  
26  
27  
28  
29  
30  
31  
32

### 33 **Study design and setting**

#### 34 Design

35  
36  
37  
38  
39 The survey will be designed as a quasi-experimental prospective evaluative study  
40 including 2 measures (at baseline and 6 months after intervention)prospective case-  
41 control-study with quasi-experimental design. The period of time of the survey is  
42 planned to be from October 2013 until July of 2014. Participants in two study groups  
43 (intervention by medical students and control) will be questioned up to 2 weeks in  
44 advance of the intervention (t1) and 6 months thereafter (t2) (see Figure 1).  
45  
46  
47  
48  
49  
50

51 We could not afford randomization as it includes a huge organizational and personal  
52 effort we were not capable to perform. In addition, some classes would not agree to  
53 participate within the study when they would be predetermined as control groups  
54  
55  
56  
57  
58  
59  
60

Formatted: Font: Bold

1  
2  
3  
4  
5  
6  
7 which became clear in advance of the investigation. To keep confounding factors to a  
8  
9 minimum, the parallel class of intervention classes in a given grade is selected for the  
10 control group. All participating schools were asked in advance to split their grades  
11 into two class-groups with the same performance level on their own. Schools who  
12 would not agree with the splitting were excluded. Parallel classes are defined as  
13 control classes which are in the same grade as the intervention class, have the same  
14 performance level as the intervention class and visit the same school as the  
15 intervention class. Consequently, all classes have parallel classes. In addition, we  
16 chose to do the follow-up after six months so the control group could receive the  
17 intervention in the same school year (after data collection is complete) which made it  
18 easier for us to cooperate with the schools.

### Data collection

28  
29  
30  
31  
32 For the collection of the data we will use a written survey in the form of a  
33 questionnaire. This questionnaire is developed to collect data to each of the defined  
34 time points (t1-t2). In addition to the socio-demographic data (age, gender, school  
35 type), we will obtain the smoking status of the school students concerning water pipe  
36 and cigarettes. The teachers sign a brief declaration where they state to be fully  
37 responsible for the sealing process directly after the questionnaires have been filled  
38 out by the pupils.

39  
40  
41  
42  
43  
44  
45  
46 To maximize the external validity of the intervention, the questionnaires will be put  
47 into envelopes which are instantly being sealed by the responsible class teachers  
48 after completion.

49  
50  
51  
52  
53 ~~To maximize the external validity of the intervention, the questionnaires will be put~~  
54 ~~into envelopes which are instantly being sealed by the responsible class teachers~~  
55  
56  
57  
58  
59  
60

Formatted: Font: Bold

1  
2  
3  
4  
5  
6  
7 after completion. The envelopes will be opened and the data evaluation will be  
8 performed under the supervision of Prof. Dr. Groneberg at the Goethe University  
9 Frankfurt. The class teachers individually supervise their classes for the completion  
10 of the questionnaire.  
11

12  
13  
14  
15 For the collection of the data we will use a written survey in the form of a  
16 questionnaire. This questionnaire is developed to collect data to each of the defined  
17 time points (t1-t2). In addition to the socio-demographic data (age, gender, school  
18 type), we will obtain the smoking status of the school students concerning water pipe  
19 and cigarettes. The teachers sign a brief declaration where they state to be fully  
20 responsible for the sealing process directly after the questionnaires have been filled  
21 out by the pupils. **Data management and analysis**  
22

23  
24  
25  
26  
27  
28  
29  
30 The envelopes will be opened and the data evaluation will be performed under the  
31 supervision of Prof. Dr. Groneberg at the Goethe University of Frankfurt. The class  
32 teachers individually supervise their classes for the completion of the questionnaire.  
33

34  
35  
36 The questionnaire will contain numerous items which have already been a part of  
37 [similar](#) investigations. The questions about the smoking status and the frequency of  
38 smoking refer to the evaluation of the school-based smoking prevention program  
39 from Heidelberg „ohne Kippe“ [18] and the publication of Lampert and Thamm [21]  
40  
41  
42  
43  
44 about the results of the child and adolescent surveys (KiGGS).  
45

46  
47  
48  
49 ~~The period of time of the survey is planned to be from October 2013 until July of~~  
50 ~~2014. Participants in two study groups (intervention by medical students and control)~~  
51 ~~will be questioned up to 2 weeks in advance of the intervention (t1) and 6 months~~  
52 ~~thereafter (t2) (see Figure 1).~~  
53  
54  
55  
56  
57  
58  
59  
60

Formatted: Font: Bold

Formatted: Space Before: Auto, After: 0 pt, Widow/Orphan control, Adjust space between Latin and Asian text, Adjust space between Asian text and numbers

1  
2  
3  
4  
5  
6  
7 To test the questionnaire in accordance to the GEP guidelines [22], we carried out 88  
8 copies to pupils with the lowest education level participating in May 2013. We  
9 investigated that 85 of these questionnaires were filled out in a useful way for  
10 evaluation. However, seven pupils did not fill out the questionnaire completely. We  
11 added a notification to turn the page at the bottom of each page to fix this problem.  
12  
13  
14  
15

## 16 17 **Participants and Sample Size**

### 18 19 *Eligibility criteria*

20  
21  
22 Students aged 10 to 15 attending grades six to eight of a secondary general,  
23 intermediate, grammar, or comprehensive school are eligible. Older or younger  
24 students, or students from other school types are persons who do not meet the  
25 inclusion criteria. The schools in Gießen and the surrounding cities are already  
26 involved in the program and let their classes participate every year. Participation is  
27 voluntary and could be ended at any time without giving a reason. The geographical  
28 area concerned (Gießen and surrounding villages) was informed via the ministry of  
29 cultural affairs in Hessen, Germany.  
30  
31  
32  
33  
34  
35  
36  
37  
38

### 39 40 *Legal approval*

41  
42 In accordance to Good Epidemiologic Practice (GEP) guidelines [22], approval of the  
43 responsible ethics committee was asked for and the committee decided that the  
44 study does not need ethical approval (ethics committee of the Goethe University,  
45 Frankfurt am Main, Germany). All legal preparations and data protection issues have  
46 been discussed with the responsible ministry of education and cultural affairs in  
47 Germany. The ministry gave approval for the stated proceed of data collection within  
48 the participating schools. In addition, each school individually discussed and  
49  
50  
51  
52  
53  
54  
55  
56  
57  
58  
59  
60

1  
2  
3  
4  
5  
6  
7 approved the study in its schools' conference. The participation of each student was  
8  
9 declared to be voluntarily and informed written consent was obtained from the  
10  
11 parents of the study participants.

### 12 13 *Sample Size Calculation*

14  
15 Even though there is no other evaluated school-based program delivered by medical  
16 students and our study therefore has an explorative character, we decided to calculate the  
17 sample size (using the program BiAS for Windows) on the basis of a recently published  
18 study which evaluated the school-based physician delivered program „non-smoking is cool“  
19 (=NiC) from Hamburg in Germany [17]. We calculated the sample on the basis of effect size  
20 requirements. To do this we used the difference of the rates of participants who started  
21 smoking within the time frame of nine months follow up in the intervention and in the control  
22 group for grammar schools from the cited study (6,4% = intervention group; 12% = control  
23 group; difference = 5,6%) [17]. We decided to use the Sack et al. publication for our  
24 calculations because the „Students in the hospital“ publication mainly included school types  
25 with a lower educational level. We used the rates for grammar schools as students from  
26 these schools are suspected to be the largest group among the participants of our study.  
27 Our calculated sample size amounts to 435 pupils per group (870 total) plus the loss to  
28 follow-up group at a test power of 80% (alpha = 0,05). We took into account the loss to  
29 follow-up effect of the „Students in the Hospital“ publication (17,8%) which increased our  
30 group size to n1 = 514 and n2 = 514 (total: 1028) [14].

31  
32  
33  
34  
35  
36  
37  
38  
39  
40  
41  
42  
43  
44  
45  
46  
47 ((Figure 1.tiff (stored separately))We did not calculate the sample size for the reason  
48 of the explorative character of the study. The recruitment sample was calculated on  
49 the basis of a recently published study [14] and will amount to 1.002 pupils (n1 = 501  
50 participating in the medical students delivered intervention n2 = 501 pupils in the  
51 control group) at least at a test power of 80% (alpha = 0,05). In consideration of the  
52  
53  
54  
55  
56  
57  
58  
59  
60

Formatted: Not Highlight

Formatted: Highlight

Formatted: Highlight

Formatted: Highlight

Formatted: Highlight

Formatted: Highlight

Formatted: Highlight



1  
2  
3  
4  
5  
6  
7  
8  
9  
10  
11  
12  
13  
14  
15  
16  
17  
18  
19  
20  
21  
22  
23  
24  
25  
26  
27  
28  
29  
30  
31  
32  
33  
34  
35  
36  
37  
38  
39  
40  
41  
42  
43  
44  
45  
46  
47  
48  
49  
50  
51  
52  
53  
54  
55  
56  
57  
58  
59  
60

loss to follow up effect, it is planned to include at least 1.200 participants (600 per group).

For peer review only

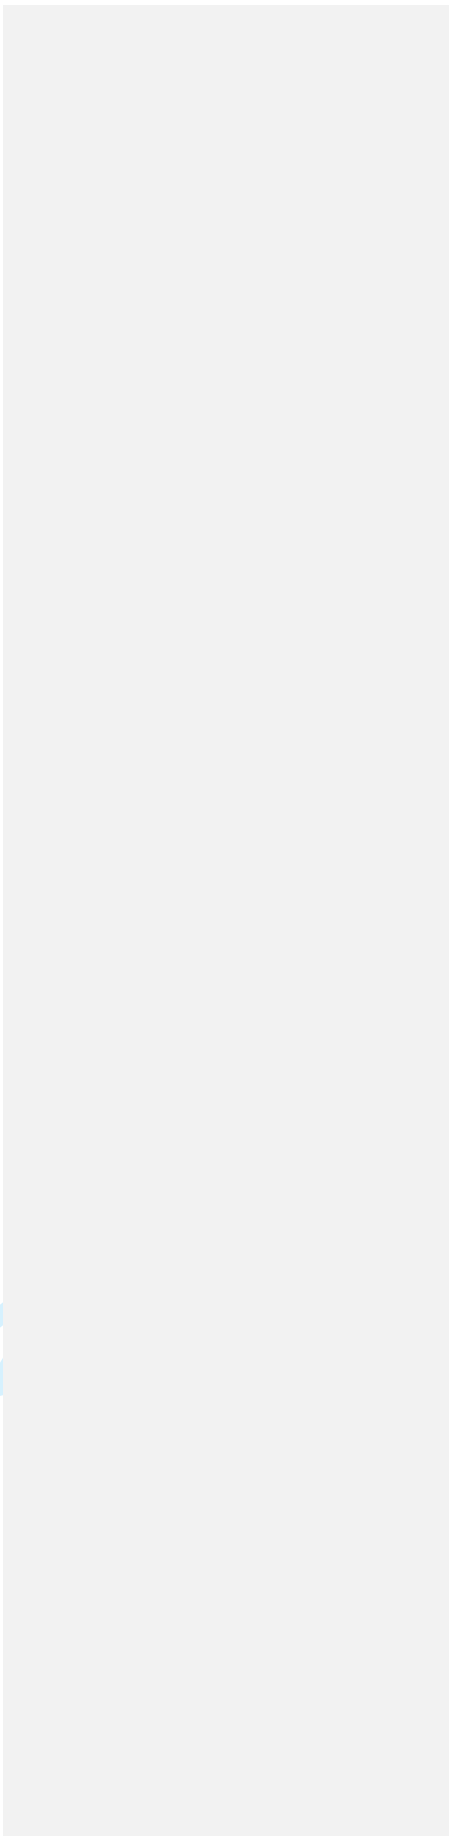

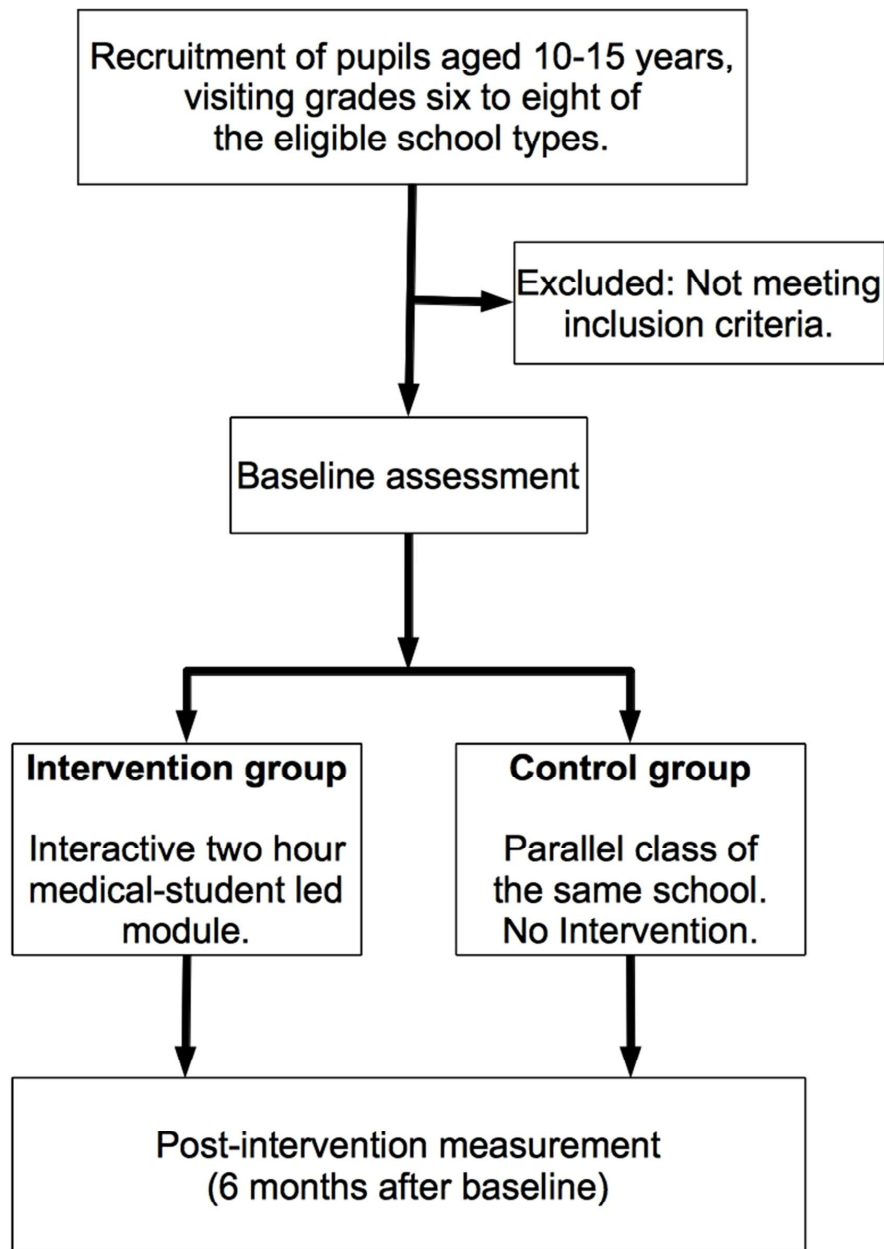

**Figure 1**  
**Study design.**

Formatted: Font: (Default) Arial

1  
2  
3  
4  
5  
6  
7  
8  
9  
10  
11  
12  
13  
14  
15  
16  
17  
18  
19  
20  
21  
22  
23  
24  
25  
26  
27  
28  
29  
30  
31  
32  
33  
34  
35  
36  
37  
38  
39  
40  
41  
42  
43  
44  
45  
46  
47  
48  
49  
50  
51  
52  
53  
54  
55  
56  
57  
58  
59  
60

### **Intervention**

The intervention consists of two parts of 60 minutes duration each. The first part is delivered in a large room in front of all pupils of the grade including a patient with a tobacco-related disease talking about his own experiences with tobacco addiction and an information-giving power point presentation. The second session is performed in an interactive classroom setting with two medical students mentoring one class. In advance of the school visit, the medical students receive brief didactic instructions, information on tobacco addiction and FAQs for preparation and a detailed plan of the curriculum. The EAT program uses a combined information-giving, social competences and social influences approach.

### **Gender specific aspects**

According to our recent study using the physician-based approach for school-based tobacco prevention [14], girls benefit from physician-delivered programs more than boys (OR 2.56, CI 1.06–6.19). We aim to assess if this result is also obtained using the EAT medical student-based approach to address gender-specific aspects. As a consequence, the program then needs to be modified for gender mainstreaming since both sexes need to be addressed equally.

### **Cultural aspects**

We hypothesize a small but significant relation between water pipe smoking and the cultural background of the pupils since tobacco smoking using a water pipe is traditional in the region of the Middle East [23]. Therefore, we plan to collect data about the cultural background. With regard to this hypothesis, comprehensive information about water pipe smoking is an integrative element of the EAT

1  
2  
3  
4  
5  
6  
7 curriculum. Within the projected optimization process, the EAT curriculum can also  
8 be structured in relation to the different school populations which can be encountered  
9 (i.e. schools with a high percentage of pupils of migration background vs. schools  
10 without).  
11  
12  
13

### 14 15 **Social aspects**

16  
17 According to a survey conducted by the Federal Centre for Health Education [5], the  
18 prevalence of cigarette smoking in the age group of 10 to 15 year old pupils was  
19 significantly higher in schools with lower education levels in Germany in 2012 (16,7%  
20 vs. 6,9%)(16). As a consequence, we plan to specifically address schools with lower  
21 education levels and to compare the effects on different school types.  
22  
23  
24  
25  
26  
27

### 28 29 **Outcomes**

30  
31 The primary endpoint is the percentage difference between smokers and non-  
32 smokers in the two study arms at baseline and 6 months after the intervention  
33 (lifetime prevalence). The percentage of former smokers and new smokers in the two  
34 two groups and the m Measures of smoking behavior (the number of cigarettes and  
35 water pipes smoked on a daily, weekly or monthly basis) will be studied as secondary  
36 outcome measures. ~~We adata concerning~~  
37  
38  
39  
40  
41  
42  
43

### 44 45 **Statistical analysis**

46 In order to examine baseline differences of pupils' characteristics in our quasi-  
47 experimental design we will use  $\chi^2$ -tests for the categorical variables and t-tests for  
48 continuous variables. No significant differences are aloud between the two study  
49 groups at baseline (t1). For the calculation of the effects predictors have on the  
50 smoking behavior after six months (t2) we use the logistic regression analysis which  
51 is the state-of-the-art technique for the evaluation of the effectiveness of prevention  
52 programs In order to detect possible differences at baseline (t1) with regard to the  
53  
54  
55  
56  
57  
58  
59  
60

Formatted: Not Highlight

Formatted: Not Highlight

Formatted: Not Highlight

1  
2  
3  
4  
5  
6  
7  
8  
9  
10  
11  
12  
13  
14  
15  
16  
17  
18  
19  
20  
21  
22  
23  
24  
25  
26  
27  
28  
29  
30  
31  
32  
33  
34  
35  
36  
37  
38  
39  
40  
41  
42  
43  
44  
45  
46  
47  
48  
49  
50  
51  
52  
53  
54  
55  
56  
57  
58  
59  
60

~~pupils' characteristics in the intervention group and control group at baseline (t1), we will use  $\chi^2$  square test for binary and categorical variables.~~

Formatted: Font: (Default) Arial

~~In order to determine relevant effect sizes in consideration of the measurements before and after the intervention, we plan to use the  $\chi^2$  square test for frequency~~

Formatted: Space Before: 0 pt, Don't adjust space between Latin and Asian text, Don't adjust space between Asian text and numbers

~~distributions. In addition, we plan to use perform the t-Test/the Wilcoxon test for mean value differences of paired and unpaired samples. In order to illustrate the attitude towards smoking between the intervention groups and the control group during the time progress of the study we plan to use the univariate variance analysis.~~

Formatted: Font: (Default) Arial

~~In order to determine relevant effect sizes in consideration of the measurements~~

~~before and after the intervention (t1/t2), we plan to use the  $\chi^2$  square test for~~

Formatted: Font: (Default) Arial

~~frequency distributions. For the calculation of the predictors of the smoking behavior~~

~~we use the logistic regression analysis which is the state-of-the-art technique for the~~

~~evaluation of the effectiveness of prevention programs [18, 24, 25] in longitudinal~~

Formatted: Not Highlight

~~studies.~~

Formatted: Font: Not Bold, Font color: Auto

~~Our significance level for t-tests is 5% (double-sided) and for confidence intervals~~

Formatted: Not Highlight

~~95% (double-sided). The software for our analysis is planned to be the newest~~

~~version of SPSS Statistics for Mac by IBM.~~

~~The test for significance is planned on the 5% level (double-sided), confidence~~

~~intervals for 95% (double-sided). The software for our analysis is planned to be the~~

~~newest version of SPSS Statistics for Mac by IBM.~~

## Discussion

### Strengths and limitations

Formatted: English (U.S.)

~~There has never been an evaluation of a medical student-delivered school-based~~

~~tobacco prevention program. However, sensitizing prospective physicians for tobacco~~

~~prevention is most necessary [12]. The perspective of this study is to suggest~~

Formatted: English (U.S.)

1  
2  
3  
4  
5  
6  
7 whether medical student delivered prevention programs in addition have preventive  
8 effects on the smoking behaviour of secondary school pupils in Germany. The data  
9 of this study gives us a sound basis for optimizing the EAT curriculum to be optimally  
10 effective for different target groups. A promising factor of the EAT program is that it  
11 uses a combined social influence and social competence curriculum which has been  
12 shown to be effective in the recently published Cochrane Analysis [13].

Formatted: English (U.S.)

Formatted: English (U.S.)

13  
14  
15  
16  
17  
18 Our study has a quasi-experimental design. The main problem of these kind of  
19 studies is the selection bias for the reason of the missing randomisation of our target  
20 group. To minimize this bias, we will match the intervention classes with the control  
21 classes in the same schools which equals the matching procedure in field  
22 experiments.

23  
24  
25  
26  
27  
28 However, as the intervention and the control groups will be in the same schools the  
29 pupils could exchange what they learn about smoking due to the intervention during  
30 the school breaks. Therefore cluster effects will not be excluded entirely.

31  
32  
33  
34  
35 Another limitation would be the fact that our research is not being done  
36 multinationally and therefore might not be representative for every ethnical and  
37 cultural background.

38  
39  
40  
41  
42  
43 Furthermore, our data collection relies on the self-reports of adolescents using our  
44 questionnaire. Consequently, there is a risk that the actual prevalence of smoking is  
45 different, e.g. due to socially desirable behaviour. This bias could only be excluded  
46 from our survey by using expensive methods like testing for cotinine (a metabolite of  
47 nicotine) in the human saliva, blood or urin. Another possible method which has been  
48 previously used by Ketala et al (2004) would be the measurement of thiocyanate in  
49 the saliva or carbon monoxide concentration in the exhaled air [26]. Ketala et al  
50  
51  
52  
53  
54  
55  
56  
57  
58  
59  
60

1  
2  
3  
4  
5  
6  
7  
8  
9  
10  
11  
12  
13  
14  
15  
16  
17  
18  
19  
20  
21  
22  
23  
24  
25  
26  
27  
28  
29  
30  
31  
32  
33  
34  
35  
36  
37  
38  
39  
40  
41  
42  
43  
44  
45  
46  
47  
48  
49  
50  
51  
52  
53  
54  
55  
56  
57  
58  
59  
60

reported an accordance of 95% comparing the results from these biochemical methods and the results from the questionnaires.

However, Connor Gorber et al (2009) found high abbreviations between biochemically assessed and self-reported smoking status for pregnant women or for patients with tobacco related diseases [27].

In our study, there might be a bias for socially desired behaviour in both study groups which might make the intervention look less effective than it actually is:

At the first measurepoint the intervention group is awaiting the intervention.

Therefore, there might be more pupils who behave in a social desirable way and declare themselves as non-smokers. In contrast, the control group knows that they will not be visited by medical students anytime soon and they might reply more honestly to the items in the questionnaire. At the second measurepoint we have the opposite situation: Our intervention group knows that the medical students will not come back and might now answer in a less socially desired way and declare themselves more likely as smokers. In contrast, the control group is now awaiting the intervention in the upcoming weeks as data collection is complete and might reply to the questionnaires in a more socially desired way (declaring themselves as non-smokers, even if they are not).

Consequently, the effects of the study might be compromised at both time points in a way, which would make the intervention look less effective.

In order to measure the long-term effects of school-based programs to prevent smoking follow-up data is usually being collected after six months and after one year.

However, we were only capable of collecting data after six months as the schools

1  
2  
3  
4  
5  
6  
7 insisted on providing an intervention for the control group in the same school year.

8  
9 Thus, it remains unclear which effects the intervention would show after one year  
10 follow-up.

11  
12  
13 ~~intervention. Therefore cluster effects cannot be excluded entirely. So far, medical~~  
14 ~~student delivered school based programmes for preventing smoking have not been~~  
15 ~~evaluated. Therefore, only little relevant data is available in scientific databases such~~  
16 ~~as Medline or PubMed. The most relevant publication on the topic is the Cochrane~~  
17 ~~Database Analysis on school based programs for preventing smoking [13]. The~~  
18 ~~authors analyzed the data from 134 studies, in 25 different countries, which included~~  
19 ~~a total of 428.293 young people aged 5-18. Of these, 49 studies reported smoking~~  
20 ~~behavior in those adolescents who had never previously smoked. The authors~~  
21 ~~concluded that further research is required to design and test programs that will be~~  
22 ~~equally effective for both genders, different cultural backgrounds and ethnic groups.~~  
23 ~~Interventions delivered by adult educators were shown to be more effective in the~~  
24 ~~longer term than peer education programs. In this respect, medical students belong~~  
25 ~~to the group of adult educators. According to the Cochrane Analysis, cost~~  
26 ~~effectiveness plays an important role for practical implementation. As EAT is~~  
27 ~~delivered by volunteering medical students, it is less expensive but more available~~  
28 ~~than physician delivered programs. [26, 27]~~

29  
30  
31  
32  
33  
34  
35  
36  
37  
38  
39  
40  
41  
42  
43  
44  
45 The Cochrane Database Analysis did not include recently published data on school  
46 based health educator delivered programs in Germany. Within the evaluation of the  
47 physician based program "Students in the Hospital" in Berlin, significant positive  
48 results were present for an information based curriculum [14].

49  
50  
51  
52  
53  
54 An anonymous survey by questionnaire from September 2007 to July 2008 was

Formatted: Space Before: Auto, After:  
Auto, Widow/Orphan control, Adjust space  
between Latin and Asian text, Adjust  
space between Asian text and numbers



1  
2  
3  
4  
5  
6  
7  
8  
9  
10  
11  
12  
13  
14  
15  
16  
17  
18  
19  
20  
21  
22  
23  
24  
25  
26  
27  
28  
29  
30  
31  
32  
33  
34  
35  
36  
37  
38  
39  
40  
41  
42  
43  
44  
45  
46  
47  
48  
49  
50  
51  
52  
53  
54  
55  
56  
57  
58  
59  
60

conducted, with a quasi-experimental control-group design, two weeks before (t1) and six months after (t2) the intervention in a group of 760 participating school students in Berlin.

The results indicated that 40.8% of the participants were smokers, among whom 79% stated that they also smoked water pipes. As major primary prevention outcome of the study, it was found that significantly fewer students in the intervention group than in the control group began smoking in the six months after the intervention ( $p < 0.001$ ). In addition, the chance of remaining a non-smoker was four times as high in the intervention group (OR, 4.14; CI, 1.66–10.36). Concerning gender aspects, girls appeared to benefit more from the intervention than boys (OR 2.56, CI 1.06–6.19)(1). 16.1% of smokers in the intervention group and 17.6% in the control group stopped smoking ( $p > 0.05$ ). Conclusively, a clear primary preventive effect of the program was demonstrated.

Since physician-based programmes are usually very expensive, it is indicated to evaluate a less expensive and widespread program.

## Conclusion

A consequence of our research is suspected to be the general acceptance that medical students and even more medical interns (PJ-medical students) offer a great opportunity to deliver primary prevention programs. This does not only refer to inpatient secondary prevention but especially refers to primary prevention within the community/school. Therefore, ~~the German~~ health systems worldwide may largely benefit from the development of a novel and low-cost measure of primary prevention.

## Authors' contributions:

TJB participated in the design of the study, carries out the study, drafted the manuscript and is supposed to perform the statistical analysis. WS supports the coordination of the study. SS-B participated in the design of the study, participated in the writing process and corrected the manuscript. DAG participated in the design of the study and corrected the manuscript. All authors read and approved the final manuscript. This study is part of a thesis project (TJB).

Formatted: English (U.S.)

Formatted: English (U.S.)

#### Competing interests:

The authors declare that they have no competing interests.

#### REFERENCES

1. Organization WH: **WHO report on the global tobacco epidemic.** [http://whqlibdoc.who.int/publications/2011/9789240687813\\_eng.pdf](http://whqlibdoc.who.int/publications/2011/9789240687813_eng.pdf) 2011.
2. Mons U: **[Tobacco-attributable mortality in Germany and in the German Federal States - calculations with data from a microcensus and mortality statistics].** *Gesundheitswesen* 2011, **73**(4):238-246.
3. Neubauer S, Welte R, Beiche A, Koenig HH, Buesch K, Leidl R: **Mortality, morbidity and costs attributable to smoking in Germany: update and a 10-year comparison.** *Tobacco control* 2006, **15**(6):464-471.
4. Hausteil K-O GD: **Tobacco or Health? Physiological and Social Damages Caused by Tobacco Smoking.** In: *Springer 2009.* edn.; 2009.
5. **Bundeszentrale für gesundheitliche Aufklärung (BZgA)-GFCfHE: Der Tabakkonsum Jugendlicher und junger Erwachsener in Deutschland 2012. (Bericht).** In: *Teilband Rauchen (Bericht).* 2013.
6. Kraus L RS, Baumeister SE, Pabst A, Steiner S: **Epidemiologischer Suchtsurvey 2006. Repräsentativerhebung zum Gebrauch und Missbrauch psychoaktiver Substanzen bei Jugendlichen und Erwachsenen in Berlin.** . In: *IFT-Bericht Band 167.* München.; 2008.
7. Laucht M SB: **Früher Einstieg in den Alkohol- und Tabakkonsum - Indikator für eine erhöhte Suchtgefährdung?** . *Z Kinder Jugendpsychiatr Psychother* 2007;35: 137-143.
8. **Bundeszentrale für gesundheitliche Aufklärung (BZgA)-GFCfHE: Die Drogenaffinität Jugendlicher in der Bundesrepublik Deutschland 2011.** In: *Teilband Rauchen (Bericht).* 2012.
9. Maziak W: **The global epidemic of waterpipe smoking.** *Addictive behaviors* 2011, **36**(1-2):1-5.

1  
2  
3  
4  
5  
6  
7  
8  
9  
10  
11  
12  
13  
14  
15  
16  
17  
18  
19  
20  
21  
22  
23  
24  
25  
26  
27  
28  
29  
30  
31  
32  
33  
34  
35  
36  
37  
38  
39  
40  
41  
42  
43  
44  
45  
46  
47  
48  
49  
50  
51  
52  
53  
54  
55  
56  
57  
58  
59  
60

10. Isensee B, Morgenstern M, Stoolmiller M, Maruska K, Sargent JD, Hanewinkel R: **Effects of Smokefree Class Competition 1 year after the end of intervention: a cluster randomised controlled trial.** *Journal of epidemiology and community health* 2012, **66**(4):334-341.
11. Hoeflmayr D, Hanewinkel R: **Do school-based tobacco prevention programmes pay off? The cost-effectiveness of the 'Smoke-free Class Competition'.** *Public health* 2008, **122**(1):34-41.
12. Bernstein SL, Yu S, Post LA, Dziura J, Rigotti NA: **Undertreatment of tobacco use relative to other chronic conditions.** *American journal of public health* 2013, **103**(8):e59-65.
13. Thomas RE, McLellan J, Perera R: **School-based programmes for preventing smoking.** *The Cochrane database of systematic reviews* 2013, **4**:CD001293.
14. Stamm-Balderjahn S, Groneberg DA, Kusma B, Jagota A, Schonfeld N: **Smoking prevention in school students: positive effects of a hospital-based intervention.** *Deutsches Arzteblatt international* 2012, **109**(44):746-752.
15. Sack P-M, Hampel J, Bröning S, Petersen KU, Andritzky B, Laack E, Thomasius R: **Was limitiert schulische Tabakprävention? Prävention und Gesundheitsförderung** 2013, **8**(4):246-251.
16. Springfield IPF: **Ineffectiveness of Fear Appeals in Youth Alcohol, Tobacco and Other Drug (ATOD) Prevention.** *Prevention First (2008)* 2008.
17. Sack P-M, Hampel J, Bröning S, Petersen KU, Andritzky B, Andritzky B, Laack E, Thomasius R: **Was limitiert schulische Tabakprävention? Prävention und Gesundheitsförderung** 2013, **8**(4):246-251.
18. Maier B, Bau AM, James J, Gorgen R, Graf C, Hanewinkel R, Martus P, Maschewsky-Schneider U, Muller MJ, Plachta-Danielzik S *et al*: **Methods for evaluation of health promotion programmes. Smoking prevention and obesity prevention for children and adolescents.** *Bundesgesundheitsblatt, Gesundheitsforschung, Gesundheitsschutz* 2007, **50**(7):980-986.
19. Thomas R, Perera R: **School-based programmes for preventing smoking.** *The Cochrane database of systematic reviews* 2006(3):CD001293.
20. Sussman S SP, McCuller WJ, Dent CW **Project Towards No Drug Abuse: two-year outcomes of a trial that compares health educator delivery to self-instruction.** *Prev Med* 2003 Aug;**37**(2):155-62 2003.
21. Lampert T, Thamm M: **[Consumption of tobacco, alcohol and drugs among adolescents in Germany. Results of the German Health Interview and Examination Survey for Children and Adolescents (KiGGS)].** *Bundesgesundheitsblatt, Gesundheitsforschung, Gesundheitsschutz* 2007, **50**(5-6):600-608.
22. **Deutsche Arbeitsgemeinschaft für Epidemiologie Epidemiologie DAfE: Leitlinien und Empfehlungen zur Sicherung von Guter Epidemiologischer Praxis (GEP).** *BMBF Gesundheitsforschung: [http://www.gesundheitsforschung-bmbf.de/media/Empfehlungen\\_GEP.pdf](http://www.gesundheitsforschung-bmbf.de/media/Empfehlungen_GEP.pdf)* 2004.
23. Akl EA, Gunukula SK, Aleem S, Obeid R, Jaoude PA, Honeine R, Irani J: **The prevalence of waterpipe tobacco smoking among the general and specific populations: a systematic review.** *BMC public health* 2011, **11**:244.
24. Pbert L, Flint AJ, Fletcher KE, Young MH, Druker S, DiFranza JR: **Effect of a pediatric practice-based smoking prevention and cessation intervention for adolescents: a randomized, controlled trial.** *Pediatrics* 2008, **121**(4):e738-747.

- 1  
2  
3  
4  
5  
6  
7 25. Sloboda Z, Stephens RC, Stephens PC, Grey SF, Teasdale B, Hawthorne RD,  
8 Williams J, Marquette JF: **The Adolescent Substance Abuse Prevention Study:  
9 A randomized field trial of a universal substance abuse prevention  
10 program.** *Drug and alcohol dependence* 2009, **102**(1-3):1-10.  
11 26. Kentala J, Utriainen P, Pahkala K, Mattila K: **Verification of adolescent self-  
12 reported smoking.** *Addictive behaviors* 2004, **29**(2):405-411.  
13 27. Connor Gorber S, Schofield-Hurwitz S, Hardt J, Levasseur G, Tremblay M: **The  
14 accuracy of self-reported smoking: a systematic review of the relationship  
15 between self-reported and cotinine-assessed smoking status.** *Nicotine &  
16 tobacco research : official journal of the Society for Research on Nicotine and  
17 Tobacco* 2009, **11**(1):12-24.  
18  
19  
20  
21  
22  
23  
24  
25  
26  
27  
28  
29  
30  
31  
32  
33  
34  
35  
36  
37  
38  
39  
40  
41  
42  
43  
44  
45  
46  
47  
48  
49  
50  
51  
52  
53  
54  
55  
56  
57  
58  
59  
60

## STROBE Statement—checklist of items that should be included in reports of observational studies

|                              | Item No | Recommendation                                                                                                                                                                                                                                                                                                                                                                                                                        |
|------------------------------|---------|---------------------------------------------------------------------------------------------------------------------------------------------------------------------------------------------------------------------------------------------------------------------------------------------------------------------------------------------------------------------------------------------------------------------------------------|
| <b>Title and abstract</b>    | 1       | (a) Indicate the study's design with a commonly used term in the title or the abstract<br>(b) Provide in the abstract an informative and balanced summary of what was done and what was found <b>checked</b>                                                                                                                                                                                                                          |
| <b>Introduction</b>          |         |                                                                                                                                                                                                                                                                                                                                                                                                                                       |
| Background/rationale         | 2       | Explain the scientific background and rationale for the investigation being reported <b>checked</b>                                                                                                                                                                                                                                                                                                                                   |
| Objectives                   | 3       | State specific objectives, including any prespecified hypotheses <b>checked</b>                                                                                                                                                                                                                                                                                                                                                       |
| <b>Methods</b>               |         |                                                                                                                                                                                                                                                                                                                                                                                                                                       |
| Study design                 | 4       | Present key elements of study design early in the paper <b>checked</b>                                                                                                                                                                                                                                                                                                                                                                |
| Setting                      | 5       | Describe the setting, locations, and relevant dates, including periods of recruitment, exposure, follow-up, and data collection <b>checked</b>                                                                                                                                                                                                                                                                                        |
| Participants                 | 6       | (a) <i>Case-control study</i> —Give the eligibility criteria, and the sources and methods of case ascertainment and control selection. Give the rationale for the choice of cases and controls <b>checked</b><br>(b) <i>Case-control study</i> —For matched studies, give matching criteria and the number of controls per case <b>checked</b>                                                                                        |
| Variables                    | 7       | Clearly define all outcomes, exposures, predictors, potential confounders, and effect modifiers. Give diagnostic criteria, if applicable <b>checked</b>                                                                                                                                                                                                                                                                               |
| Data sources/<br>measurement | 8*      | For each variable of interest, give sources of data and details of methods of assessment (measurement). Describe comparability of assessment methods if there is more than one group <b>checked</b>                                                                                                                                                                                                                                   |
| Bias                         | 9       | Describe any efforts to address potential sources of bias <b>checked</b>                                                                                                                                                                                                                                                                                                                                                              |
| Study size                   | 10      | Explain how the study size was arrived at <b>checked</b>                                                                                                                                                                                                                                                                                                                                                                              |
| Quantitative variables       | 11      | Explain how quantitative variables were handled in the analyses. If applicable, describe which groupings were chosen and why <b>checked</b>                                                                                                                                                                                                                                                                                           |
| Statistical methods          | 12      | (a) Describe all statistical methods, including those used to control for confounding <b>checked</b><br>(b) Describe any methods used to examine subgroups and interactions <b>checked</b><br>(c) Explain how missing data were addressed <b>checked</b><br><i>Case-control study</i> —If applicable, explain how matching of cases and controls was addressed <b>checked</b><br>(e) Describe any sensitivity analyses <b>checked</b> |

Continued on next page

**Results**

|                  |     |                                                                                                                                                                                                                                                                                                                                                                                                                                                            |
|------------------|-----|------------------------------------------------------------------------------------------------------------------------------------------------------------------------------------------------------------------------------------------------------------------------------------------------------------------------------------------------------------------------------------------------------------------------------------------------------------|
| Participants     | 13* | (a) Report numbers of individuals at each stage of study—eg numbers potentially eligible, examined for eligibility, confirmed eligible, included in the study, completing follow-up, and analysed <b>checked</b><br>(b) Give reasons for non-participation at each stage <b>checked</b><br>(c) Consider use of a flow diagram <b>checked</b>                                                                                                               |
| Descriptive data | 14* | (a) Give characteristics of study participants (eg demographic, clinical, social) and information on exposures and potential confounders <b>checked</b><br>(b) Indicate number of participants with missing data for each variable of interest <b>checked</b>                                                                                                                                                                                              |
| Outcome data     | 15* | <i>Cohort study</i> —Report numbers of outcome events or summary measures over time<br><i>Case-control study</i> —Report numbers in each exposure category, or summary measures of exposure <b>checked</b><br><i>Cross-sectional study</i> —Report numbers of outcome events or summary measures                                                                                                                                                           |
| Main results     | 16  | (a) Give unadjusted estimates and, if applicable, confounder-adjusted estimates and their precision (eg, 95% confidence interval). Make clear which confounders were adjusted for and why they were included <b>checked</b><br>(b) Report category boundaries when continuous variables were categorized <b>checked</b><br>(c) If relevant, consider translating estimates of relative risk into absolute risk for a meaningful time period <b>checked</b> |
| Other analyses   | 17  | Report other analyses done—eg analyses of subgroups and interactions, and sensitivity analyses <b>checked</b>                                                                                                                                                                                                                                                                                                                                              |

**Discussion**

|                  |    |                                                                                                                                                                                           |
|------------------|----|-------------------------------------------------------------------------------------------------------------------------------------------------------------------------------------------|
| Key results      | 18 | Summarise key results with reference to study objectives <b>checked</b>                                                                                                                   |
| Limitations      | 19 | Discuss limitations of the study, taking into account sources of potential bias or imprecision. Discuss both direction and magnitude of any potential bias <b>checked</b>                 |
| Interpretation   | 20 | Give a cautious overall interpretation of results considering objectives, limitations, multiplicity of analyses, results from similar studies, and other relevant evidence <b>checked</b> |
| Generalisability | 21 | Discuss the generalisability (external validity) of the study results <b>checked</b>                                                                                                      |

**Other information**

|         |    |                                                                                                                                                                              |
|---------|----|------------------------------------------------------------------------------------------------------------------------------------------------------------------------------|
| Funding | 22 | Give the source of funding and the role of the funders for the present study and, if applicable, for the original study on which the present article is based <b>checked</b> |
|---------|----|------------------------------------------------------------------------------------------------------------------------------------------------------------------------------|

\*Give information separately for cases and controls in case-control studies and, if applicable, for exposed and unexposed groups in cohort and cross-sectional studies.

**Note:** An Explanation and Elaboration article discusses each checklist item and gives methodological background and published examples of transparent reporting. The STROBE checklist is best used in conjunction with this article (freely available on the Web sites of PLoS Medicine at <http://www.plosmedicine.org/>, Annals of Internal Medicine at <http://www.annals.org/>, and Epidemiology at <http://www.epidem.com/>). Information on the STROBE Initiative is available at [www.strobe-statement.org](http://www.strobe-statement.org).

# BMJ Open

## Education Against Tobacco (EAT) - A quasi-experimental prospective evaluation of a programme for preventing smoking in secondary schools delivered by medical students: a study protocol

|                                 |                                                                                                                                                                                                                                                                                                                                                                                                     |
|---------------------------------|-----------------------------------------------------------------------------------------------------------------------------------------------------------------------------------------------------------------------------------------------------------------------------------------------------------------------------------------------------------------------------------------------------|
| Journal:                        | <i>BMJ Open</i>                                                                                                                                                                                                                                                                                                                                                                                     |
| Manuscript ID:                  | bmjopen-2014-004909.R2                                                                                                                                                                                                                                                                                                                                                                              |
| Article Type:                   | Protocol                                                                                                                                                                                                                                                                                                                                                                                            |
| Date Submitted by the Author:   | 30-Jun-2014                                                                                                                                                                                                                                                                                                                                                                                         |
| Complete List of Authors:       | Brinker, Titus; Goethe-University, Institute of Occupational Medicine, Social Medicine and Environmental Medicine<br>Stamm-Balderjahn, Sabine; Charité University Medicine, Institute of Medical Sociology<br>Werner, Seeger; Max-Planck Institute for Heart and Lung Research, Groneberg, David; Goethe-University, Institute of Occupational Medicine, Social Medicine and Environmental Medicine |
| <b>Primary Subject Heading</b>: | Smoking and tobacco                                                                                                                                                                                                                                                                                                                                                                                 |
| Secondary Subject Heading:      | Smoking and tobacco, Epidemiology, Public health                                                                                                                                                                                                                                                                                                                                                    |
| Keywords:                       | smoking prevention, schools, tobacco prevention, medical students, adolescent smoking, school-based prevention                                                                                                                                                                                                                                                                                      |
|                                 |                                                                                                                                                                                                                                                                                                                                                                                                     |

SCHOLARONE™  
Manuscripts

Only

1  
2  
3  
4  
5 **Education Against Tobacco (EAT) - A quasi-experimental prospective**  
6  
7 **evaluation of a programme for preventing smoking in secondary schools**  
8  
9 **delivered by medical students: a study protocol**  
10

11  
12  
13  
14 Titus J. Brinker<sup>1\*</sup>, Sabine Stamm-Balderjahn<sup>2</sup>, Werner Seeger<sup>3</sup>, David A. Groneberg<sup>1</sup>  
15  
16

17  
18 <sup>1</sup> Institute of Occupational Medicine, Social Medicine and Environmental  
19  
20  
21  
22  
23  
24  
25  
26  
27  
28  
29  
30  
31  
32  
33  
34  
35  
36  
37  
38  
39  
40  
41  
42  
43  
44  
45  
46  
47  
48  
49  
50  
51  
52  
53  
54  
55  
56  
57  
58  
59  
60  
Institute of Occupational Medicine, Social Medicine and Environmental  
Medicine, Goethe-University, 60590 Frankfurt, Germany

<sup>2</sup> Institute of Medical Sociology, Charité University Medicine, Luisenstraße 13 A,  
10117 Berlin, Germany

<sup>3</sup> Max-Planck Institute for Heart and Lung Research, 61231 Bad Nauheim,  
Germany

E-mail: titus.brinker@gmail.com (TJB), sabine.stamm-balderjahn@charite.de (SS-B),  
werner.seeger@mpi-bn.mpg.de (WS), arbsozmed@uni-frankfurt.de (DAG)

\* Address for correspondence: Titus Brinker, Institute of Occupational Medicine,  
Social Medicine and Environmental Medicine, Goethe-University, 60590 Frankfurt,  
Email: titus.brinker@gmail.com



**ABSTRACT**

*Introduction:* A survey conducted by the German Federal Centre for Health Education in 2012 showed that 35.2% of all young adults (18 to 25 years) and 12.0% of all adolescents (12 to 17 years) in Germany are regular cigarette smokers. Most consumed their first cigarette in early adolescence. We recently reported a significantly positive short-term effect of a physician-delivered school-based smoking prevention programme on the smoking behaviour of school children in Germany. However, physician-based programmes are usually very expensive. Therefore, we will evaluate and optimize Education against Tobacco (EAT), a widespread, low-cost programme delivered by about 400 medical students from 16 universities in Germany.

*Methods and analysis:* Prospective quasi-experimental study design with two measurements at baseline (t1) and 6 months post-intervention (t2) to investigate an intervention in 10- to 15-year-olds in grades six to eight at German secondary schools. The intervention programme consists of two 60-minute school-based medical-student delivered modules with (module 1) and without the involvement of patients with tobacco-related diseases and control groups (no intervention). The study questionnaire measuring smoking status (water pipe and cigarette smoking), smoking-related cognitions, and gender, social and cultural aspects was designed and pre-tested in advance. The primary endpoint is the percentage difference between smokers and non-smokers in the two study arms at baseline and 6 months after the intervention. The percentage of former smokers and new smokers in the two groups and the measures of smoking behaviour will be studied as secondary outcome measures.

1  
2  
3 *Ethics and dissemination:* In accordance with Good Epidemiologic Practice (GEP)  
4 guidelines, the study protocol was submitted for approval by the responsible ethics  
5 committee, which decided that the study does not need ethical approval (Goethe  
6 University, Frankfurt-Main, Germany). Findings will be disseminated in peer-reviewed  
7 journals, at conferences, within our scientific advisory board and through medical  
8 students within the EAT project.  
9  
10  
11  
12  
13  
14  
15  
16  
17  
18

### 19 **Strengths and limitations of this study**

- 20  
21 • No medical student-delivered school-based tobacco prevention programme  
22 has been evaluated for its primary preventive effect to date.
- 23  
24 • It is imperative to sensitize prospective physicians to tobacco prevention.
- 25  
26 • The quasi-experimental design of this study might cause a selection bias due  
27 to the lack of randomization.
- 28  
29 • Cluster effects cannot be excluded entirely as the control classes are located  
30 in the same schools and pupils could exchange what they have learned.
- 31  
32 • As our research is not multi-national, it might not be useful for persons of all  
33 ethnic and cultural backgrounds.
- 34  
35 • Because our study relies on self-reports obtained from adolescents via a  
36 questionnaire for data collection, there is a risk that the actual prevalence of  
37 smoking may be different from the reported prevalence, e.g. due to social  
38 desirability bias.
- 39  
40 • Our follow-up data is only collected six months after the intervention due to  
41 organisational reasons. Thus, we will not be able to determine which effects  
42 the intervention might have at one year follow-up.  
43  
44  
45  
46  
47  
48  
49  
50  
51  
52  
53  
54  
55  
56  
57  
58  
59  
60

## Background

Tobacco consumption is a risk factor for various diseases and leads to the highest number of avoidable deaths worldwide [1]. Despite warning labels and public interventions, smoking was responsible for almost 107,000 deaths in Germany alone in 2007 [2]. There are high costs associated with smoking. One study estimated the smoking-related costs for acute hospital care, inpatient rehabilitation care, ambulatory care and prescription drugs in Germany to be EUR 7.5 billion in 2003 [3].

Most smokers started smoking in early adolescence [4]. In a survey conducted by the German Federal Centre for Health Education (BZgA) in 2012, 35.2% of all young adults (18 to 25 years) and 12.0% of all adolescents (12 to 17 years) in Germany described themselves as regular cigarette smokers [5]. A 2006 survey that quantified nicotine dependence in Germany using the Fagerström test [6] reported that 50.8% of the 15- to 17-year-old smokers and 41.8% of the 18- to 24-year-old smokers were dependent on nicotine. Laucht and Schmid [7] reported a correlation between the number of cigarettes smoked by 15-year-olds and the starting age of smoking; moreover, those adolescents who had started smoking earlier in life were more likely to be still consuming tobacco and to consume more cigarettes and have a higher degree of dependence than their peers.

Furthermore, the use of water pipes has increased in the past few years [8].

According to a 2011 survey by the Federal Centre for Health Education, 8.7% of adolescents and 11.2% of young adults surveyed had smoked water pipe at least once in the 30 days leading up to the survey [8]. Male respondents smoked water pipe more frequently than women [8]. According to Maziak, water pipes lead the way to cigarette smoking and have similarly deleterious effects on human health [9]. Early primary prevention of smoking is thus of crucial importance and should be promoted,

1  
2  
3 evaluated and optimized.

4  
5  
6 Some scientifically evaluated smoking prevention programmes already exist in  
7  
8 Germany, like the Smoke-Free Class (SFC) competition which has been practically  
9  
10 implemented in many countries of the European Union [10-12]. However, the only  
11  
12 study of the SFC competition which reported a significant effect on the prevention of  
13  
14 smoking at the longest follow-up had multiple biases according to the recent  
15  
16 Cochrane Database Systematic Review on incentives for preventing smoking in  
17  
18 adolescents by Johnston et al. [12]. In addition, Johnston et al. calculated the  
19  
20 adjusted relative risk (RR) of the study and no longer detected a statistically  
21  
22 significant difference [12]. Finally, the authors concluded that there are no incentive  
23  
24 programmes available to date which have shown to prevent smoking initiation among  
25  
26 youth [12].  
27  
28  
29

30  
31 In addition to that, the SFC competition focuses only on cigarettes and not on water  
32  
33 pipe smoking. Furthermore, there is no comparable beneficial effect for the  
34  
35 instructors of the SFC programme. Education Against Tobacco additionally sensitizes  
36  
37 prospective physicians to the importance of tobacco prevention. A recent study from  
38  
39 Yale University suggests that tobacco addiction is undertreated by physicians in  
40  
41 comparison to other chronic conditions [13]. The authors concluded that alternative  
42  
43 models of engagement may be needed to enhance use of effective treatments for  
44  
45 tobacco addiction and to raise awareness among physicians.  
46  
47  
48

49  
50 To our knowledge, medical student delivered school-based programmes for  
51  
52 preventing smoking have not been evaluated to date. Little relevant data is available  
53  
54 in scientific databases such as Medline or PubMed. The most relevant publication on  
55  
56 the topic is the Cochrane Database Analysis on school-based programmes for  
57  
58 preventing smoking [14]. The authors analyzed the data from 134 studies in 25  
59  
60

1  
2  
3 different countries in a total of 428,293 young people aged 5 to 18. Forty-nine of  
4  
5 these studies reported smoking behaviour in adolescents who had never previously  
6  
7 smoked. No overall effect of intervention curricula vs. control was found based on the  
8  
9 pooled results at follow-up at one year or less (odds ratio [OR] 0.94, 95% confidence  
10  
11 interval [CI] 0.85 to 1.05) [14]. From our perspective, the most relevant finding of the  
12  
13 Cochrane Analysis is that social competence and social influence curricula have a  
14  
15 statistically significant effect of preventing the onset of smoking [14]. The authors  
16  
17 concluded that further research is required to design and test programmes that will  
18  
19 be equally effective for people of different genders, cultural backgrounds and ethnic  
20  
21 groups. Interventions delivered by adult educators were shown to be more effective  
22  
23 in the longer term than peer-education programmes. Medical students belong to the  
24  
25 group of adult educators. According to the Cochrane Analysis, cost-effectiveness  
26  
27 plays an important role in practical implementation. As Education against Tobacco is  
28  
29 delivered by medical student volunteers, it is less expensive and more available than  
30  
31 physician-delivered programmes.  
32  
33  
34  
35  
36

37  
38 Secondary school programmes which involve physicians as health educators already  
39  
40 exist. In fact, Stamm-Balderjahn et al. [15] recently published data on a school-based  
41  
42 physician-delivered programme (Students in the Hospital) in Berlin, which achieved  
43  
44 significant positive results with a multimodal approach .From September 2007 to July  
45  
46 2008, they conducted an anonymous questionnaire survey with a quasi-experimental  
47  
48 control group design two weeks before (t1) and six months after (t2) the intervention  
49  
50 in a group of 760 participating school students in Berlin. The results indicated that  
51  
52 40.8% of the participants were smokers at baseline, 79% of whom stated that they  
53  
54 also smoked water pipes. Regarding the primary prevention outcome of the study, it  
55  
56 was found that significantly fewer students in the intervention group began smoking  
57  
58  
59  
60

1  
2  
3 within six months of the intervention than in the control group ( $p < 0.001$ ). In addition,  
4  
5 the chance of remaining a non-smoker was four times higher in the intervention  
6  
7 group (OR, 4.14; CI, 1.66–10.36). Concerning gender, girls appeared to benefit more  
8  
9 from the intervention than boys (OR 2.56, CI 1.06–6.19). 16.1% of smokers in the  
10  
11 intervention group and 17.6% in the control group stopped smoking ( $p > 0.05$ ). A  
12  
13 primary preventive effect of the programme was clearly and conclusively  
14  
15 demonstrated.  
16  
17

18  
19 Non-smoking is Cool (NiC), another physician-delivered programme based in  
20  
21 Hamburg, Germany, addresses grades 5 to 6 of all secondary school types (total  
22  
23 sample size reported: 1359 students) [16]. The programme uses a social influence-  
24  
25 and fear-based curriculum. Multiple studies have shown that fear-based appeals are  
26  
27 ineffective for primary tobacco prevention in the long term [17]. NiC proved to be  
28  
29 effective in grammar schools, where it reduced the onset of smoking in the  
30  
31 intervention group by 50% compared to the control group at three and nine months  
32  
33 follow-up, but with a small effect size [18]. Nevertheless, it failed to show a significant  
34  
35 primary preventive effect in schools with a lower educational level (general,  
36  
37 intermediate, or comprehensive school) [18].  
38  
39  
40  
41

42  
43 Considering the high cost of physician-based programmes and the lack of available  
44  
45 physicians, it is indicated to evaluate a less expensive and widespread programme  
46  
47 that sensitizes prospective physicians to tobacco prevention.  
48  
49

### 50 **Gender specific aspects**

51  
52

53  
54 Our recent study using the physician-based approach for school-based tobacco  
55  
56 prevention [15] showed that girls benefit from physician-delivered programmes more  
57  
58 than boys (OR 2.56, CI 1.06–6.19). We aim to assess whether this effect is also  
59  
60

1  
2  
3 observed using the EAT medical student-based approach. If so, the programme will  
4  
5 be modified for gender mainstreaming since both sexes need to be addressed  
6  
7 equally.  
8  
9

### 10 **Cultural aspects**

11  
12  
13 We hypothesize that there will be a small but significant relation between water pipe  
14  
15 smoking and cultural background since water pipe use is traditional in the Middle  
16  
17 East region [19]. Therefore, we plan to collect data on the cultural background of the  
18  
19 students. Comprehensive information about water pipe smoking is an integral  
20  
21 component of the EAT programme. Within the proposed optimization process, the  
22  
23 EAT curriculum can be tailored to the different school populations (e.g., schools with  
24  
25 or without a high percentage of pupils with a migration background) as needed.  
26  
27  
28  
29

### 30 **Social aspects**

31  
32  
33 According to a survey conducted by the Federal Centre for Health Education [5], the  
34  
35 prevalence of cigarette smoking in 10- to 15-year-olds in Germany was significantly  
36  
37 higher in schools with lower education levels in 2012 (16.7% vs. 6.9%).  
38  
39

40  
41 Consequently, we plan to specifically address schools with lower education levels  
42  
43 and to compare the effects of the intervention on different school types.  
44  
45

### 46 **School-based smoking prevention programme delivered by medical students**

47  
48 Education Against Tobacco (EAT) is a non-profit, medical student-delivered school-  
49  
50 based smoking prevention programme founded in August 2011 by Titus Brinker, a  
51  
52 medical student at the University of Gießen, and developed in cooperation with  
53  
54 professors from the Universities of Gießen, Frankfurt and Marburg as well as medical  
55  
56 students from Texas A&M University. The programme takes the Cochrane Analysis  
57  
58  
59  
60

1  
2  
3 into account [20]. Its mission is to focus on the development of low-cost prevention  
4 programmes and their implications for research, and to combine social influences  
5 approaches with generic social competence approaches. Both of these key points  
6 were taken into account when developing the curriculum. At the time of development,  
7 there was already research available that encouraged the use of medical students in  
8 such programmes. For example, Sussman et al. [21] concluded that health educator-  
9 led drug prevention programmes are more effective than self-instructed programmes.  
10  
11 Since physician-based programmes have proven to be successful [15] but usually  
12 are very expensive, we aimed to evaluate and optimize Education Against Tobacco,  
13 a widespread low-cost programme which is being delivered by about 400 medical  
14 students at 16 universities in Germany. It costs only about EUR 25 per participating  
15 class. The city of Gießen, home of the largest EAT group with the highest level of  
16 experience and the most participating EAT schools, is an adequate platform to  
17 evaluate the effects of EAT.  
18  
19  
20  
21  
22  
23  
24  
25  
26  
27  
28  
29  
30  
31  
32  
33  
34  
35  
36

### 37 Objectives

- 38  
39  
40 1) To assess the efficacy of the programme, we investigated two main questions:  
41 a. Does the EAT programme help non-smokers to remain abstinent?  
42 b. Does the EAT programme encourage smokers to take steps to stop  
43 smoking?  
44  
45  
46  
47  
48 2) To assess whether the programme is equally effective for participants of  
49 different gender, social and cultural backgrounds, we investigated the  
50 questions:  
51 a. Is the EAT programme equally effective for both genders?  
52 b. Is the EAT programme equally effective for different school types?  
53 c. Is the EAT programme equally effective for different cultural  
54 backgrounds?  
55  
56  
57  
58  
59  
60



## Methods

### Design

The survey is designed as a quasi-experimental prospective evaluative study with two measurements (baseline and 6 months post-intervention). The planned study period is October 2013 until July of 2014. Participants in two study groups (intervention and control groups) will be questioned up to 2 weeks in advance of the intervention (t1) and 6 months thereafter (t2) (see Figure 1).

Randomization could not be performed due to the tremendous organizational and personal effort required for it. Some classes refused to participate when informed that they would be control groups. To keep confounding factors to a minimum, a parallel class in a given grade was selected as the control group. All participating schools were asked in advance to split their grades into two class-groups with the same performance levels. Schools that did not agree to the splitting procedure were excluded. A parallel class is defined as a control class in the same grade as the intervention class, with the same performance level as the intervention class, and attending the same school as the intervention class. All intervention classes had parallel classes. We chose to do the follow-up at six months so that the control group could receive the intervention in the same school year (after data collection was completed). This made it easier for us to convince schools to participate.

### Participants

#### *Eligibility criteria*

1  
2  
3 Students aged 10 to 15 attending grades six to eight of a secondary general,  
4 intermediate, grammar, or comprehensive school are eligible. Older or younger  
5 students or students from other school types are not. Schools in Gießen and the  
6 surrounding area already participate in the programme each year. They know that  
7 participation is voluntary and can be ended at any time without giving a reason. The  
8 geographical area concerned (Gießen and surrounding villages) was informed about  
9 the study via the Hessian Ministry of Education and Cultural Affairs.  
10  
11  
12  
13  
14  
15  
16  
17  
18  
19

20 (Figure1.tiff (stored separately))  
21

## 22 **Intervention**

23  
24  
25  
26 The programme consists of two 60-minute modules. The first part is presented by  
27 two to six medical students and a patient with a tobacco-related disease to all pupils  
28 at the same time inside a large room within the school. It consists of an interactive  
29 PowerPoint presentation in which the participants are encouraged to make their own  
30 well-informed decisions and receive relevant knowledge on handling confrontations  
31 with their peers (social competence approach). The university hospital patient with a  
32 smoking-related disease is interviewed about his reasons to start smoking and the  
33 influence tobacco consumption had on his life. The participants are encouraged to  
34 ask the patient questions. The second part takes place in an interactive classroom  
35 setting in which two medical students (usually a male and a female) tutor one class.  
36  
37 Both modules focus on educating adolescents about the strategies of the tobacco  
38 industry to influence their decision in a non-objective manner (social influence) and  
39 on peer pressure (social influence), decision-making and skills for coping with  
40 challenges in their life in a healthy way (social competence). The participants also  
41 discuss information relevant for their age group, e.g., why non-smokers look usually  
42  
43  
44  
45  
46  
47  
48  
49  
50  
51  
52  
53  
54  
55  
56  
57  
58  
59  
60

1  
2  
3 more attractive, have more money to buy things, or are in better physical shape. The  
4  
5 programme focuses on not scaring but educating its participants in an interactive  
6  
7 manner. EAT uses a combined social influences and social competences approach,  
8  
9 which was described as the most effective approach in the recently published  
10  
11 Cochrane Analysis [14].  
12  
13

### 14 15 **Data collection**

16  
17  
18 A written survey questionnaire is used for the collection of the data. The  
19  
20 questionnaire was developed to collect data at both time points (t1-t2). In addition to  
21  
22 the socio-demographic data (age, gender, school type), it will capture the smoking  
23  
24 status of the school students concerning water pipe and cigarette consumption.  
25  
26  
27

28  
29 The questionnaire contains numerous items which have already been included in  
30  
31 similar investigations. The questions about the smoking status and the frequency of  
32  
33 smoking refer to the evaluation of the school-based smoking prevention programmes  
34  
35 in Heidelberg entitled “ohne kippe” (no butts) [22] and in Berlin entitled “Students in  
36  
37 the hospital” [14] as well as to the results of the KiGGs child and adolescent surveys  
38  
39 published by Lampert and Thamm [23].  
40  
41

42 To test the questionnaire in accordance to the GEP guidelines [24], we distributed 88  
43  
44 copies to pupils with the lowest education level in May 2013. 85 of the completed  
45  
46 questionnaires were deemed as a useful way for evaluation, but seven had not been  
47  
48 filled out completely. Therefore, we added a note to turn the page at the bottom of  
49  
50 each page to fix this problem.  
51  
52

53  
54 The class teachers will individually supervise their classes during the completion of  
55  
56 the questionnaire. To maximize the confidentiality of the intervention, the  
57  
58 questionnaires will be placed in envelopes which are instantly being sealed by the  
59  
60

1  
2  
3 responsible class teachers immediately after completion. The envelopes will be  
4  
5 opened and the data entry and analysis will be performed under the supervision of  
6  
7 Prof. Dr. Groneberg at the Goethe University of Frankfurt.  
8  
9

## 10 **Outcomes**

11  
12  
13  
14 The primary outcome is the prevalence of smokers and non-smokers at 6 months  
15  
16 after the intervention. The percentage of former smokers and new smokers in the two  
17  
18 groups and the measures of smoking behaviour (the number of cigarettes and water  
19  
20 pipes smoked on a daily, weekly or monthly basis) will be studied as secondary  
21  
22 outcome measures. A smoker is defined as a pupil who claims to smoke at least  
23  
24 “once a month” within the survey. Those pupils who claim not to smoke at all are  
25  
26 defined as non-smokers. In accordance to their answers within the survey, non-  
27  
28 smokers will be divided in “former smokers” and in “non-smokers who have never  
29  
30 smoked before”.  
31  
32  
33  
34

## 35 **Statistical analysis**

### 36 *Sample Size Calculation*

37  
38  
39  
40  
41 As there is no other evaluated school-based programme delivered by medical students, our  
42  
43 study has an explorative character. Still, we decided to calculate the sample size (using the  
44  
45 programme BiAS for Windows) on the basis of a recently published study which evaluated  
46  
47 the “Non-smoking is Cool” school-based physician delivered programme in Hamburg [18].  
48  
49 To calculate the sample based on effect size requirements, we used the difference in the  
50  
51 number of persons who started smoking within nine months between the intervention and  
52  
53 control group at grammar schools investigated in the reference study (6.4% in the  
54  
55 intervention group vs. 12% in the control group yields a difference of 5.6%) [16]. We  
56  
57 decided to use the method of Sack et al. for our calculations because “Students in the  
58  
59  
60

1  
2  
3 Hospital” mainly included school types with a lower educational level. We used the rates for  
4  
5 grammar school students, who will be the largest group of participants in our study. Thus,  
6  
7 we calculated that the required sample size is 435 pupils per group (870 total), plus the loss  
8  
9 to follow-up group at a test power of 80% (alpha = 0.05). We took into account the loss to  
10  
11 follow-up effect of “Students in the Hospital” (17,8%), which increased our group size to  $n_1 =$   
12  
13 514 and  $n_2 = 514$  (total: 1028) [15].  
14  
15

### 16 17 *Analysis*

18  
19 In order to examine baseline differences of pupils’ characteristics in our quasi-  
20  
21 experimental design we will use  $\chi^2$ -tests for the categorical variables and t-tests for  
22  
23 continuous variables. There must be no significant differences between the two study  
24  
25 groups at baseline (t1). The effects of predictors (like gender, culture and social  
26  
27 characteristics) on the smoking behaviour after six months (t2) will be calculated by  
28  
29 logistic regression analysis, a state-of-the-art technique for the evaluation of the  
30  
31 effectiveness of prevention programmes [22, 25, 26] in longitudinal studies. The  
32  
33 significance level is 5% for t-tests (double-sided) and 95% for confidence intervals  
34  
35 (double-sided). The statistical analysis will be performed using the newest version of  
36  
37 SPSS Statistics for Mac by IBM.  
38  
39  
40  
41  
42

### 43 **Legal approval**

44  
45  
46 In accordance with Good Epidemiologic Practice (GEP) guidelines [24], the study  
47  
48 protocol was submitted for approval by the responsible ethics committee, which  
49  
50 decided that the study does not need ethical approval (ethics committee of Goethe  
51  
52 University, Frankfurt-Main, Germany). All legal and data protection issues were  
53  
54 discussed with the responsible authority, the Ministry of Education and Cultural  
55  
56 Affairs in Germany, which approved the proposed data collection within the  
57  
58  
59  
60

1  
2  
3 participating schools. In addition, each school individually discussed and approved  
4  
5 the study at a school conference. It was explained to each student that participation  
6  
7 is voluntarily, and informed written consent was obtained from the parents of the  
8  
9 study participants.  
10

## 11 12 13 14 **Discussion**

15  
16  
17 No evaluation of a medical student-delivered school-based tobacco prevention  
18  
19 programme is available to date. It is imperative to sensitize prospective physicians to  
20  
21 tobacco prevention [13]. An additional aim of this study is to evaluate whether a  
22  
23 medical student-delivered smoking prevention program has preventive effects on the  
24  
25 smoking behaviour of secondary school pupils in Germany. The data from this study  
26  
27 will provide a sound basis for optimizing the Education Against Tobacco curriculum to  
28  
29 make it optimally effective for different target groups. A promising factor of the EAT  
30  
31 programme is that it uses a combined social influence and social competence  
32  
33 approach, which was been shown to be effective in the recently published Cochrane  
34  
35 Analysis [14].  
36  
37  
38  
39

40 Our study has a quasi-experimental design. The main problem of this kind of study is  
41  
42 selection bias due to the lack of randomization. To minimize this problem, we will  
43  
44 match the intervention classes with control classes (same grade and school), which  
45  
46 corresponds to the matching procedure in field experiments.  
47

48  
49 As the intervention and control groups attend the same schools, the pupils could  
50  
51 exchange what they learn about smoking in the intervention during school breaks.  
52

53  
54 Therefore cluster effects cannot be excluded entirely.  
55

56  
57 Also, as our research is not multi-national, it might not be useful for persons of all  
58  
59 ethnic and cultural backgrounds.  
60

1  
2  
3 Because our study relies on self-reports obtained from adolescents via a  
4 questionnaire for data collection, there is a risk that the actual prevalence of smoking  
5 may be different from the reported prevalence, e.g. due to social desirability bias.  
6  
7

8  
9 This bias can only be excluded by using expensive methods like testing for cotinine  
10 (a metabolite of nicotine) in the saliva, blood or urine of the students. Other  
11 alternatives described by Ketala et al. (2004) include the measurement of  
12 thiocyanate in saliva or carbon monoxide in exhaled air [27]. This group reported  
13 95% agreement between the results of these biochemical tests and the results of  
14 questionnaires. Conversely, Connor Gorber et al. (2009) found high differences  
15 between biochemically assessed and self-reported smoking status in pregnant  
16 women and patients with tobacco-related diseases [28]. In our study, there might be  
17 social desirability bias in both study groups, which might make the intervention look  
18 less effective than it actually is:  
19  
20  
21  
22  
23  
24  
25  
26  
27  
28  
29  
30  
31

32  
33 The first measurement at baseline occurs while the intervention group is anticipating  
34 the intervention. Therefore, more intervention group students might feel compelled to  
35 behave in a socially desirable way and falsely declare that they are non-smokers. In  
36 contrast, the control group students know that they will not see the medical students  
37 again anytime soon, so they might be inclined to answer more honestly to the items  
38 on the questionnaire. At the second measurement time point, the situation is  
39 reversed: Because the intervention group students know that the medical students  
40 will not come back, they might feel less social desirability pressure and be more likely  
41 to admit that they are smokers. In contrast, the control group students will be  
42 awaiting the next intervention in the coming weeks, so they might reply to the  
43 questionnaires in a more socially desired way (declaring that they are non-smokers  
44 even if they smoke).  
45  
46  
47  
48  
49  
50  
51  
52  
53  
54  
55  
56  
57  
58  
59  
60

1  
2  
3 Consequently, the study could be compromised by social desirability bias at both  
4  
5 time points, which could make the intervention look less effective.  
6  
7

8  
9 In order to measure the long-term effects of school-based programmes, follow-up  
10  
11 data is usually collected six months and one year after an intervention. However, we  
12  
13 will only be able to collect data six months post-intervention because the schools  
14  
15 insisted on us providing an intervention for the control group in the same school year.  
16  
17 Thus, we will not be able to determine which effects the intervention might have at  
18  
19 one year follow-up.  
20  
21

## 22 23 **Conclusion**

24  
25 We expect that our research will find general acceptance because the investigated  
26  
27 programme provides many medical students and even more medical interns (e.g., in  
28  
29 the elective period known) a great opportunity to deliver prevention programmes not  
30  
31 only in inpatient secondary prevention, but also and in particular in primary  
32  
33 prevention in schools and communities. Health systems worldwide could benefit from  
34  
35 the development of such novel and low-cost primary smoking prevention  
36  
37 programmes.  
38  
39  
40  
41  
42  
43  
44  
45  
46  
47  
48  
49  
50  
51  
52  
53  
54  
55  
56  
57  
58  
59  
60



**Funding:**

Each participating school pays a small fee for the copies of the questionnaire that are being distributed to every participating student. There are no other funding sources available.

**Authors' contributions**

TJB contributed to the design and conduct of the study, drafted the manuscript, and will perform the statistical analysis. WS supports the coordination of the study. SS-B contributed to the design of the study, participated in the writing process, and proofread the manuscript. DAG contributed to the design of the study and proofread the manuscript. All authors read and approved the final manuscript. This study is part of a thesis project (TJB).

**Competing interests:**

The authors declare that they have no competing interests.

**Data Sharing Statement:**

No additional data available

## REFERENCES

1. World Health Organization: **WHO report on the global tobacco epidemic.** [http://whqlibdoc.who.int/publications/2011/9789240687813\\_eng.pdf](http://whqlibdoc.who.int/publications/2011/9789240687813_eng.pdf) 2011.
2. Mons U: **[Tobacco-attributable mortality in Germany and in the German Federal States - calculations with data from a microcensus and mortality statistics].** *Gesundheitswesen* 2011, **73**(4):238-246.
3. Neubauer S, Welte R, Beiche A, et al. **Mortality, morbidity and costs attributable to smoking in Germany: update and a 10-year comparison.** *Tobacco control* 2006, **15**(6):464-471.
4. Hausteil K-O GD: **Tobacco or Health? Physiological and Social Damages Caused by Tobacco Smoking.** In: *Springer 2009.* edn.; 2009.
5. Bundeszentrale für gesundheitliche Aufklärung (BZgA): **Der Tabakkonsum Jugendlicher und junger Erwachsener in Deutschland 2012. (Bericht).** In: *Teilband Rauchen (Bericht).* 2013.
6. Kraus L RS, Baumeister SE, Pabst A, et al. **Epidemiologischer Suchtsurvey 2006. Repräsentativerhebung zum Gebrauch und Missbrauch psychoaktiver Substanzen bei Jugendlichen und Erwachsenen in Berlin.** . In: IFT-Bericht Band 167. München.; 2008.
7. Laucht M SB: **Früher Einstieg in den Alkohol- und Tabakkonsum – Indikator für eine erhöhte Suchtgefährdung? .** *Z Kinder Jugendpsychiatr Psychother* 2007;35: 137–143.
8. Bundeszentrale für gesundheitliche Aufklärung (BZgA): **Die Drogenaffinität Jugendlicher in der Bundesrepublik Deutschland 2011.** In: *Teilband Rauchen (Bericht).* 2012.
9. Maziak W: **The global epidemic of waterpipe smoking.** *Addictive behaviors* 2011, **36**(1-2):1-5.
10. Isensee B, Morgenstern M, Stoolmiller M, et al. **Effects of Smokefree Class Competition 1 year after the end of intervention: a cluster randomised controlled trial.** *Journal of epidemiology and community health* 2012, **66**(4):334-341.
11. Hoeflmayr D, Hanewinkel R: **Do school-based tobacco prevention programmes pay off? The cost-effectiveness of the 'Smoke-free Class Competition'.** *Public health* 2008, **122**(1):34-41.
12. Johnston V, Liberato S, Thomas D: **Incentives for preventing smoking in children and adolescents.** *The Cochrane database of systematic reviews* 2012, **10**:CD008645.
13. Bernstein SL, Yu S, Post LA, et al. **Undertreatment of tobacco use relative to other chronic conditions.** *American journal of public health* 2013, **103**(8):e59-65.
14. Thomas RE, McLellan J, Perera R: **School-based programmes for preventing smoking.** *The Cochrane database of systematic reviews* 2013, **4**:CD001293.
15. Stamm-Balderjahn S, Groneberg DA, Kusma B, et al. **Smoking prevention in school students: positive effects of a hospital-based intervention.** *Deutsches Arzteblatt international* 2012, **109**(44):746-752.
16. Sack P-M, Hampel J, Bröning S, et al. **Was limitiert schulische Tabakprävention? Prävention und Gesundheitsförderung** 2013, **8**(4):246-251.
17. Springfield IPF: **Ineffectiveness of Fear Appeals in Youth Alcohol, Tobacco and Other Drug (ATOD) Prevention.** *Prevention First (2008)* 2008.

- 1  
2  
3  
4  
5  
6  
7  
8  
9  
10  
11  
12  
13  
14  
15  
16  
17  
18  
19  
20  
21  
22  
23  
24  
25  
26  
27  
28  
29  
30  
31  
32  
33  
34  
35  
36  
37  
38  
39  
40  
41  
42  
43  
44  
45  
46  
47  
48  
49  
50  
51  
52  
53  
54  
55  
56  
57  
58  
59  
60
18. Sack P-M, Hampel J, Bröning S, et al. **Was limitiert schulische Tabakprävention?** *Prävention und Gesundheitsförderung* 2013, **8**(4):246-251.
  19. Akl EA, Gunukula SK, Aleem S, et al. **The prevalence of waterpipe tobacco smoking among the general and specific populations: a systematic review.** *BMC public health* 2011, **11**:244.
  20. Thomas R, Perera R: **School-based programmes for preventing smoking.** *The Cochrane database of systematic reviews* 2006(3):CD001293.
  21. Sussman S SP, McCuller WJ, Dent CW. **Project Towards No Drug Abuse: two-year outcomes of a trial that compares health educator delivery to self-instruction.** *Prev Med* 2003 Aug;37(2):155-62 2003.
  22. Maier B, Bau AM, James J, et al. **Methods for evaluation of health promotion programmes. Smoking prevention and obesity prevention for children and adolescents.** *Bundesgesundheitsblatt, Gesundheitsforschung, Gesundheitsschutz* 2007, **50**(7):980-986.
  23. Lampert T, Thamm M: **[Consumption of tobacco, alcohol and drugs among adolescents in Germany. Results of the German Health Interview and Examination Survey for Children and Adolescents (KiGGS)].** *Bundesgesundheitsblatt, Gesundheitsforschung, Gesundheitsschutz* 2007, **50**(5-6):600-608.
  24. Epidemiologie DAfr: **Leitlinien und Empfehlungen zur Sicherung von Guter Epidemiologischer Praxis (GEP).** *BMBF Gesundheitsforschung*: [http://www.gesundheitsforschung-bmbf.de/media/Empfehlungen\\_GEPpdf](http://www.gesundheitsforschung-bmbf.de/media/Empfehlungen_GEPpdf) 2004.
  25. Pbert L, Flint AJ, Fletcher KE, et al. **Effect of a pediatric practice-based smoking prevention and cessation intervention for adolescents: a randomized, controlled trial.** *Pediatrics* 2008, **121**(4):e738-747.
  26. Sloboda Z, Stephens RC, Stephens PC, et al. **The Adolescent Substance Abuse Prevention Study: A randomized field trial of a universal substance abuse prevention program.** *Drug and alcohol dependence* 2009, **102**(1-3):1-10.
  27. Kentala J, Utriainen P, Pakkala K, t al. **Verification of adolescent self-reported smoking.** *Addictive behaviors* 2004, **29**(2):405-411.
  28. Connor Gorber S, Schofield-Hurwitz S, Hardt J, et al. **The accuracy of self-reported smoking: a systematic review of the relationship between self-reported and cotinine-assessed smoking status.** *Nicotine & tobacco research : official journal of the Society for Research on Nicotine and Tobacco* 2009, **11**(1):12-24.

1  
2  
3  
4  
5 **Education Against Tobacco (EAT) - A quasi-experimental prospective**  
6  
7 **evaluation of a programme for preventing smoking in secondary schools**  
8  
9 **delivered by medical students: a study protocol**  
10  
11

12  
13  
14 Titus J. Brinker<sup>1\*</sup>, Sabine Stamm-Balderjahn<sup>2</sup>, Werner Seeger<sup>3</sup>, David A. Groneberg<sup>1</sup>  
15  
16

17  
18 <sup>1</sup> Institute of Occupational Medicine, Social Medicine and Environmental  
19  
20  
21  
22  
23  
24  
25  
26  
27  
28  
29  
30  
31  
32  
33  
34  
35  
36  
37  
38  
39  
40  
41  
42  
43  
44  
45  
46  
47  
48  
49  
50  
51  
52  
53  
54  
55  
56  
57  
58  
59  
60  
Institute of Occupational Medicine, Social Medicine and Environmental  
Medicine, Goethe-University, 60590 Frankfurt, Germany

<sup>2</sup> Institute of Medical Sociology, Charité University Medicine, Luisenstraße 13 A,  
10117 Berlin, Germany

<sup>3</sup> Max-Planck Institute for Heart and Lung Research, 61231 Bad Nauheim,  
Germany

E-mail: titus.brinker@gmail.com (TJB), sabine.stamm-balderjahn@charite.de (SS-B),  
werner.seeger@mpi-bn.mpg.de (WS), arbsozmed@uni-frankfurt.de (DAG)

\* Address for correspondence: Titus Brinker, Institute of Occupational Medicine,  
Social Medicine and Environmental Medicine, Goethe-University, 60590 Frankfurt,  
Email: titus.brinker@gmail.com

## ABSTRACT

**Background/Introduction:** A survey conducted by the German Federal Centre for Health Education in 2012 showed that 35.2% of all young adults (18 to 25 years) and 12.0% of all adolescents (12 to 17 years) in Germany are regular cigarette smokers. Most consumed their first cigarette in early adolescence. We recently reported a significantly positive short-term effect of a physician-delivered school-based smoking prevention programme on the smoking behaviour of school children in Germany. However, physician-based programmes are usually very expensive. Therefore, we will evaluate and optimize Education against Tobacco (EAT), a widespread, low-cost programme delivered by about 400 medical students from 16 universities in Germany.

**Methods and analysis:** Prospective quasi-experimental study design with two measurements at baseline (t1) and 6 months post-intervention (t2) to investigate an intervention in 10- to 15-year-olds in grades six to eight at German secondary schools. The intervention programme consists of two 60-minute school-based medical-student delivered modules with (module 1) and without the involvement of patients with tobacco-related diseases and control groups (no intervention). The study questionnaire measuring smoking status (water pipe and cigarette smoking), smoking-related cognitions, and gender, social and cultural aspects was designed and pre-tested in advance. The primary endpoint is the percentage difference between smokers and non-smokers in the two study arms at baseline and 6 months after the intervention. The percentage of former smokers and new smokers in the two groups and the measures of smoking behaviour will be studied as secondary outcome measures.

1  
2  
3 *Ethics and dissemination:* In accordance with Good Epidemiologic Practice (GEP)  
4 guidelines, the study protocol was submitted for approval by the responsible ethics  
5 committee, which decided that the study does not need ethical approval (Goethe  
6 University, Frankfurt-Main, Germany). Findings will be disseminated in peer-reviewed  
7 journals, at conferences, within our scientific advisory board and through medical  
8 students within the EAT project.  
9  
10  
11  
12  
13  
14  
15  
16  
17  
18

### 19 **Strengths and limitations of this study**

- 20  
21 • No medical student-delivered school-based tobacco prevention programme  
22 has been evaluated for its primary preventive effect to date.
- 23  
24 • It is imperative to sensitize prospective physicians to tobacco prevention.
- 25  
26 • The quasi-experimental design of this study might cause a selection bias due  
27 to the lack of randomization.
- 28  
29 • Cluster effects cannot be excluded entirely as the control classes are located  
30 in the same schools and pupils could exchange what they have learned.
- 31  
32 • As our research is not multi-national, it might not be useful for persons of all  
33 ethnic and cultural backgrounds.
- 34  
35 • Because our study relies on self-reports obtained from adolescents via a  
36 questionnaire for data collection, there is a risk that the actual prevalence of  
37 smoking may be different from the reported prevalence, e.g. due to social  
38 desirability bias.
- 39  
40 • Our follow-up data is only collected six months after the intervention due to  
41 organisational reasons. Thus, we will not be able to determine which effects  
42 the intervention might have at one year follow-up.  
43  
44  
45  
46  
47  
48  
49  
50  
51  
52  
53  
54  
55  
56  
57  
58  
59  
60

## Background

Tobacco consumption is a risk factor for various diseases and leads to the highest number of avoidable deaths worldwide [1]. Despite warning labels and public interventions, smoking was responsible for almost 107,000 deaths in Germany alone in 2007 [2]. There are high costs associated with smoking. One study estimated the smoking-related costs for acute hospital care, inpatient rehabilitation care, ambulatory care and prescription drugs in Germany to be EUR 7.5 billion in 2003 [3].

Most smokers started smoking in early adolescence [4]. In a survey conducted by the German Federal Centre for Health Education (BZgA) in 2012, 35.2% of all young adults (18 to 25 years) and 12.0% of all adolescents (12 to 17 years) in Germany described themselves as regular cigarette smokers [5]. A 2006 survey that quantified nicotine dependence in Germany using the Fagerström test [6] reported that 50.8% of the 15- to 17-year-old smokers and 41.8% of the 18- to 24-year-old smokers were dependent on nicotine. Laucht and Schmid [7] reported a correlation between the number of cigarettes smoked by 15-year-olds and the starting age of smoking; moreover, those adolescents who had started smoking earlier in life were more likely to be still consuming tobacco and to consume more cigarettes and have a higher degree of dependence than their peers.

Furthermore, the use of water pipes has increased in the past few years [8].

According to a 2011 survey by the Federal Centre for Health Education, 8.7% of adolescents and 11.2% of young adults surveyed had smoked water pipe at least once in the 30 days leading up to the survey [8]. Male respondents smoked water pipe more frequently than women [8]. According to Maziak, water pipes lead the way to cigarette smoking and have similarly deleterious effects on human health [9]. Early primary prevention of smoking is thus of crucial importance and should be promoted,

1  
2  
3 evaluated and optimized.  
4

5  
6 Some scientifically ~~validated~~-evaluated smoking prevention programmes already  
7  
8 exist in Germany, like the Smoke-Free Class (SFC) competition, ~~which was shown to~~  
9  
10 ~~have a significant primary preventive long term effect and cost effectiveness~~ which  
11  
12 has been practically implemented in many countries of the European Union [10-12].  
13  
14 However, the only study of the SFC competition which reported a significant effect on  
15  
16 the prevention of smoking at the longest follow-up had multiple biases according to  
17  
18 the recent Cochrane Database Systematic Review on incentives for preventing  
19  
20 smoking in adolescents by Johnston et al. [12]. In addition, Johnston et al. calculated  
21  
22 the adjusted relative risk (RR) of the study and no longer detected a statistically  
23  
24 significant difference [12]. Finally, the authors concluded that there are no incentive  
25  
26 programmes available to date which have shown to prevent smoking initiation among  
27  
28 youth [12].  
29  
30  
31

32 In addition to that, However, the SFC competition focuses only on cigarettes and not  
33  
34 on water pipe smoking. ~~Furthermore~~In addition, there is no comparable beneficial  
35  
36 effect for the instructors of the SFC programme. Education Against Tobacco  
37  
38 additionally sensitizes prospective physicians to the importance of tobacco  
39  
40 prevention. A recent study from Yale University suggests that tobacco addiction is  
41  
42 undertreated by physicians in comparison to other chronic conditions [13]. The  
43  
44 authors concluded that alternative models of engagement may be needed to  
45  
46 enhance use of effective treatments for tobacco addiction and to raise awareness  
47  
48 among physicians.  
49  
50  
51

52  
53  
54 To our knowledge, medical student delivered school-based programmes for  
55  
56 preventing smoking have not been evaluated to date. Little relevant data is available  
57  
58 in scientific databases such as Medline or PubMed. The most relevant publication on  
59  
60



1  
2  
3 the topic is the Cochrane Database Analysis on school-based programmes for  
4 preventing smoking [14]. The authors analyzed the data from 134 studies in 25  
5  
6 different countries in a total of 428,293 young people aged 5 to 18. Forty-nine of  
7  
8 these studies reported smoking behaviour in adolescents who had never previously  
9  
10 smoked. No overall effect of intervention curricula vs. control was found based on the  
11  
12 pooled results at follow-up at one year or less (odds ratio [OR] 0.94, 95% confidence  
13  
14 interval [CI] 0.85 to 1.05) [14]. From our perspective, the most relevant finding of the  
15  
16 Cochrane Analysis is that social competence and social influence curricula have a  
17  
18 statistically significant effect of preventing the onset of smoking [14]. The authors  
19  
20 concluded that further research is required to design and test programmes that will  
21  
22 be equally effective for people of different genders, cultural backgrounds and ethnic  
23  
24 groups. Interventions delivered by adult educators were shown to be more effective  
25  
26 in the longer term than peer-education programmes. Medical students belong to the  
27  
28 group of adult educators. According to the Cochrane Analysis, cost-effectiveness  
29  
30 plays an important role in practical implementation. As Education against Tobacco is  
31  
32 delivered by medical student volunteers, it is less expensive and more available than  
33  
34 physician-delivered programmes.  
35  
36  
37  
38  
39

40  
41 Secondary school programmes which involve physicians as health educators already  
42  
43 exist. In fact, Stamm-Balderjahn et al. [15] recently published data on a school-based  
44  
45 physician-delivered programme (Students in the Hospital) in Berlin, which achieved  
46  
47 significant positive results with a multimodal approach .From September 2007 to July  
48  
49 2008, they conducted an anonymous questionnaire survey with a quasi-experimental  
50  
51 control group design two weeks before (t1) and six months after (t2) the intervention  
52  
53 in a group of 760 participating school students in Berlin. The results indicated that  
54  
55 40.8% of the participants were smokers at baseline, 79% of whom stated that they  
56  
57  
58  
59  
60

1  
2  
3 also smoked water pipes. Regarding the primary prevention outcome of the study, it  
4  
5 was found that significantly fewer students in the intervention group began smoking  
6  
7 within six months of the intervention than in the control group ( $p < 0.001$ ). In addition,  
8  
9 the chance of remaining a non-smoker was four times higher in the intervention  
10  
11 group (OR, 4.14; CI, 1.66–10.36). Concerning gender, girls appeared to benefit more  
12  
13 from the intervention than boys (OR 2.56, CI 1.06–6.19). 16.1% of smokers in the  
14  
15 intervention group and 17.6% in the control group stopped smoking ( $p > 0.05$ ). A  
16  
17 primary preventive effect of the programme was clearly and conclusively  
18  
19 demonstrated.  
20  
21  
22

23  
24 Non-smoking is Cool (NiC), another physician-delivered programme based in  
25  
26 Hamburg, Germany, addresses grades 5 to 6 of all secondary school types (total  
27  
28 sample size reported: 1359 students) [16]. The programme uses a social influence-  
29  
30 and fear-based curriculum. Multiple studies have shown that fear-based appeals are  
31  
32 ineffective for primary tobacco prevention in the long term [17]. NiC proved to be  
33  
34 effective in grammar schools, where it reduced the onset of smoking in the  
35  
36 intervention group by 50% compared to the control group at three and nine months  
37  
38 follow-up, but with a small effect size [18]. Nevertheless, it failed to show a significant  
39  
40 primary preventive effect in schools with a lower educational level (general,  
41  
42 intermediate, or comprehensive school) [18].  
43  
44  
45

46  
47 Considering the high cost of physician-based programmes and the lack of available  
48  
49 physicians, it is indicated to evaluate a less expensive and widespread programme  
50  
51 that sensitizes prospective physicians to tobacco prevention.  
52

### Gender specific aspects

53  
54  
55  
56  
57  
58  
59  
60

1  
2  
3 Our recent study using the physician-based approach for school-based tobacco  
4 prevention [15] showed that girls benefit from physician-delivered programmes more  
5 than boys (OR 2.56, CI 1.06–6.19). We aim to assess whether this effect is also  
6 observed using the EAT medical student-based approach. If so, the programme will  
7 be modified for gender mainstreaming since both sexes need to be addressed  
8 equally.

### 17 Cultural aspects

20 We hypothesize that there will be a small but significant relation between water pipe  
21 smoking and cultural background since water pipe use is traditional in the Middle  
22 East region [19]. Therefore, we plan to collect data on the cultural background of the  
23 students. Comprehensive information about water pipe smoking is an integral  
24 component of the EAT programme. Within the proposed optimization process, the  
25 EAT curriculum can be tailored to the different school populations (e.g., schools with  
26 or without a high percentage of pupils with a migration background) as needed.

### 37 Social aspects

40 According to a survey conducted by the Federal Centre for Health Education [5], the  
41 prevalence of cigarette smoking in 10- to 15-year-olds in Germany was significantly  
42 higher in schools with lower education levels in 2012 (16.7% vs. 6.9%).  
43 Consequently, we plan to specifically address schools with lower education levels  
44 and to compare the effects of the intervention on different school types.

## 53 **School-based smoking prevention programme delivered by medical students**

55 Education Against Tobacco (EAT) is a non-profit, medical student-delivered school-  
56 based smoking prevention programme founded in August 2011 by Titus Brinker, a  
57  
58  
59  
60

1  
2  
3 medical student at the University of Gießen, and developed in cooperation with  
4  
5 professors from the Universities of Gießen, Frankfurt and Marburg as well as medical  
6  
7 students from Texas A&M University. The programme takes the Cochrane Analysis  
8  
9 into account [20]. Its mission is to focus on the development of low-cost prevention  
10  
11 programmes and their implications for research, and to combine social influences  
12  
13 approaches with generic social competence approaches. Both of these key points  
14  
15 were taken into account when developing the curriculum. At the time of development,  
16  
17 there was already research available that encouraged the use of medical students in  
18  
19 such programmes. For example, Sussman et al. [21] concluded that health educator-  
20  
21 led drug prevention programmes are more effective than self-instructed programmes.  
22  
23  
24  
25  
26 Since physician-based programmes have proven to be successful [15] but usually  
27  
28 are very expensive, we aimed to evaluate and optimize Education Against Tobacco,  
29  
30 a widespread low-cost programme which is being delivered by about 400 medical  
31  
32 students at 16 universities in Germany. It costs only about EUR 25 per participating  
33  
34 class. The city of Gießen, home of the largest EAT group with the highest level of  
35  
36 experience and the most participating EAT schools, is an adequate platform to  
37  
38 evaluate the effects of EAT.  
39  
40  
41  
42

### 43 **Objectives**

- 44  
45  
46  
47 1) To assess the efficacy of the programme, we investigated two main questions:  
48  
49 a. Does the EAT programme help non-smokers to remain abstinent?  
50  
51 b. Does the EAT programme encourage smokers to take steps to stop  
52  
53 smoking?  
54  
55  
56 2) To assess whether the programme is equally effective for participants of  
57  
58 different gender, social and cultural backgrounds, we investigated the  
59  
60 questions:

- a. Is the EAT programme equally effective for both genders?
- b. Is the EAT programme equally effective for different school types?
- c. Is the EAT programme equally effective for different cultural backgrounds?

## Methods

### Intervention

The programme consists of two 60-minute modules. The first part is presented by two to six medical students and a patient with a tobacco-related disease to all pupils at the same time inside a large room within the school. It consists of an interactive PowerPoint presentation in which the participants are encouraged to make their own well-informed decisions and receive relevant knowledge on handling confrontations with their peers (social competence approach). The university hospital patient with a smoking-related disease is interviewed about his reasons to start smoking and the influence tobacco consumption had on his life. The participants are encouraged to ask the patient questions. The second part takes place in an interactive classroom setting in which two medical students (usually a male and a female) tutor one class. Both modules focus on educating adolescents about the strategies of the tobacco industry to influence their decision in a non-objective manner (social influence) and on peer pressure (social influence), decision-making and skills for coping with challenges in their life in a healthy way (social competence). The participants also discuss information relevant for their age group, e.g., why non-smokers look usually more attractive, have more money to buy things, or are in better physical shape. The programme focuses on not scaring but educating its participants in an interactive manner. EAT uses a combined social influences and social competences approach,

1  
2  
3 ~~which was described as the most effective approach in the recently published~~  
4  
5 ~~Cochrane Analysis [14].~~  
6  
7  
8  
9

## 10 ~~Study design and setting~~

### 11 ~~Design~~ 12 Design

13  
14  
15  
16  
17  
18 The survey is designed as a quasi-experimental prospective evaluative study with  
19 two measurements (baseline and 6 months post-intervention). The planned study  
20 period is October 2013 until July of 2014. Participants in two study groups  
21 (intervention and control groups) will be questioned up to 2 weeks in advance of the  
22 intervention (t1) and 6 months thereafter (t2) (see Figure 1).  
23  
24  
25  
26  
27  
28

29  
30 Randomization could not be performed due to the tremendous organizational and  
31 personal effort required for it. Some classes refused to participate when informed that  
32 they would be control groups. To keep confounding factors to a minimum, a parallel  
33 class in a given grade was selected as the control group. All participating schools  
34 were asked in advance to split their grades into two class-groups with the same  
35 performance levels. Schools that did not agree to the splitting procedure were  
36 excluded. A parallel class is defined as a control class in the same grade as the  
37 intervention class, with the same performance level as the intervention class, and  
38 attending the same school as the intervention class. All intervention classes had  
39 parallel classes. We chose to do the follow-up at six months so that the control group  
40 could receive the intervention in the same school year (after data collection was  
41 completed). This made it easier for us to convince schools to participate.  
42  
43  
44  
45  
46  
47  
48  
49  
50  
51  
52  
53  
54  
55  
56

### 57 Participants

58  
59  
60

### Eligibility criteria

Students aged 10 to 15 attending grades six to eight of a secondary general, intermediate, grammar, or comprehensive school are eligible. Older or younger students or students from other school types are not. Schools in Gießen and the surrounding area already participate in the programme each year. They know that participation is voluntary and can be ended at any time without giving a reason. The geographical area concerned (Gießen and surrounding villages) was informed about the study via the Hessian Ministry of Education and Cultural Affairs.

(Figure1.tiff (stored separately))

### Intervention

The programme consists of two 60-minute modules. The first part is presented by two to six medical students and a patient with a tobacco-related disease to all pupils at the same time inside a large room within the school. It consists of an interactive PowerPoint presentation in which the participants are encouraged to make their own well-informed decisions and receive relevant knowledge on handling confrontations with their peers (social competence approach). The university hospital patient with a smoking-related disease is interviewed about his reasons to start smoking and the influence tobacco consumption had on his life. The participants are encouraged to ask the patient questions. The second part takes place in an interactive classroom setting in which two medical students (usually a male and a female) tutor one class. Both modules focus on educating adolescents about the strategies of the tobacco industry to influence their decision in a non-objective manner (social influence) and on peer pressure (social influence), decision-making and skills for coping with challenges in their life in a healthy way (social competence). The participants also

discuss information relevant for their age group, e.g., why non-smokers look usually more attractive, have more money to buy things, or are in better physical shape. The programme focuses on not scaring but educating its participants in an interactive manner. EAT uses a combined social influences and social competences approach, which was described as the most effective approach in the recently published Cochrane Analysis [14].

### **Data collection**

A written survey questionnaire is used for the collection of the data. The questionnaire was developed to collect data at both time points (t1-t2). In addition to the socio-demographic data (age, gender, school type), it will capture the smoking status of the school students concerning water pipe and cigarette consumption. ~~To maximize the external validity of the intervention, the questionnaires will be placed in envelopes which are instantly being sealed by the responsible class teachers immediately after completion.~~

The questionnaire contains numerous items which have already been included in similar investigations. The questions about the smoking status and the frequency of smoking refer to the evaluation of the school-based smoking prevention programmes in Heidelberg entitled “ohne kippe” (no butts) [22] and in Berlin entitled “Students in the hospital” [14] as well as to the results of the KiGGs child and adolescent surveys published by Lampert and Thamm [23].

To test the questionnaire in accordance to the GEP guidelines [24], we distributed 88 copies to pupils with the lowest education level in May 2013. 85 of the completed questionnaires were deemed as a useful way for evaluation, but seven had not been filled out completely. Therefore, we added a note to turn the page at the bottom of



each page to fix this problem.

The class teachers will individually supervise their classes during the completion of the questionnaire. To maximize the confidentiality of the intervention, the questionnaires will be placed in envelopes which are instantly being sealed by the responsible class teachers immediately after completion. The envelopes will be opened and the data entry and analysis will be performed under the supervision of Prof. Dr. Groneberg at the Goethe University of Frankfurt.

### **Data management and analysis**

~~The envelopes will be opened and data analysis performed under the supervision of Prof. Dr. Groneberg at the Goethe University of Frankfurt. The class teachers will individually supervise their classes during the completion of the questionnaire.~~

~~The questionnaire contains numerous items which have already been included in similar investigations. The questions about the smoking status and the frequency of smoking refer to the evaluation of the school-based smoking prevention programmes in Heidelberg entitled “Ohne Kippe” (No Butts) [22] and in Berlin entitled “Students in the hospital” [14] as well as to the results of the KiGGS child and adolescent surveys published by Lampert and Thamm [23].~~

~~To test the questionnaire in accordance to the GEP guidelines [24], we distributed 88 copies to pupils with the lowest education level in May 2013. 85 of the completed questionnaires were deemed as a useful way for evaluation, but seven had not been filled out completely. Therefore, we added a note to turn the page at the bottom of each page to fix this problem.~~

## **Participants and sample size**

### *Eligibility criteria*

Students aged 10 to 15 attending grades six to eight of a secondary general, intermediate, grammar, or comprehensive school are eligible. Older or younger students or students from other school types are not. Schools in Gießen and the surrounding area already participate in the programme each year. They know that participation is voluntary and can be ended at any time without giving a reason. The geographical area concerned (Gießen and surrounding villages) was informed about the study via the Hessian Ministry of Education and Cultural Affairs.

### *Legal approval*

In accordance with Good Epidemiologic Practice (GEP) guidelines [24], the study protocol was submitted for approval by the responsible ethics committee, which decided that the study does not need ethical approval (ethics committee of Goethe University, Frankfurt Main, Germany). All legal and data protection issues were discussed with the responsible authority, the Ministry of Education and Cultural Affairs in Germany, which approved the proposed data collection within the participating schools. In addition, each school individually discussed and approved the study at a school conference. It was explained to each student that participation is voluntarily, and informed written consent was obtained from the parents of the study participants.

### *Sample Size Calculation*

As there is no other evaluated school-based programme delivered by medical students, our study has an explorative character. Still, we decided to calculate the sample size (using the

programme BiAS for Windows) on the basis of a recently published study which evaluated the “Non-smoking is Cool” school-based physician-delivered programme in Hamburg [18]. To calculate the sample based on effect size requirements, we used the difference in the number of persons who started smoking within nine months between the intervention and control group at grammar schools investigated in the reference study (6.4% in the intervention group vs. 12% in the control group yields a difference of 5.6%) [16]. We decided to use the method of Sack et al. for our calculations because “Students in the Hospital” mainly included school types with a lower educational level. We used the rates for grammar school students, who will be the largest group of participants in our study. Thus, we calculated that the required sample size is 435 pupils per group (870 total), plus the loss to follow-up group at a test power of 80% ( $\alpha = 0.05$ ). We took into account the loss to follow-up effect of “Students in the Hospital” (17,8%), which increased our group size to  $n_1 = 514$  and  $n_2 = 514$  (total: 1028) [15].

(Figure1.tiff (stored seperately))

### **Gender-specific aspects**

Our recent study using the physician-based approach for school-based tobacco prevention [15] showed that girls benefit from physician-delivered programmes more than boys (OR 2.56, CI 1.06–6.19). We aim to assess whether this effect is also observed using the EAT medical student-based approach. If so, the programme will be modified for gender mainstreaming since both sexes need to be addressed equally.

### **Cultural aspects**

1  
2  
3 We hypothesize that there will be a small but significant relation between water pipe  
4 smoking and cultural background since water pipe use is traditional in the Middle  
5 East region [19]. Therefore, we plan to collect data on the cultural background of the  
6 students. Comprehensive information about water pipe smoking is an integral  
7 component of the EAT programme. Within the proposed optimization process, the  
8 EAT curriculum can be tailored to the different school populations (e.g., schools with  
9 or without a high percentage of pupils with a migration background) as needed.  
10  
11  
12  
13  
14  
15  
16  
17  
18  
19

### 20 **Social aspects**

21  
22  
23 According to a survey conducted by the Federal Centre for Health Education [5], the  
24 prevalence of cigarette smoking in 10- to 15-year-olds in Germany was significantly  
25 higher in schools with lower education levels in 2012 (16.7% vs. 6.9%).  
26  
27  
28

29 Consequently, we plan to specifically address schools with lower education levels  
30 and to compare the effects of the intervention on different school types.  
31  
32  
33  
34  
35  
36  
37  
38

### 39 **Outcomes**

40  
41 The primary outcome is the prevalence of smokers and non-smokers at 6 months  
42 after the intervention. The primary endpoint is the percentage difference between  
43 smokers and non-smokers in the two study arms at baseline and 6 months after the  
44 intervention (lifetime prevalence). The percentage of former smokers and new  
45 smokers in the two groups and the measures of smoking behaviour (the number of  
46 cigarettes and water pipes smoked on a daily, weekly or monthly basis) will be  
47  
48  
49  
50  
51  
52  
53  
54  
55 studied as secondary outcome measures. A smoker is defined as a pupil who claims  
56 to smoke at least "once a month" within the survey. Those pupils who claim not to  
57  
58  
59  
60

1  
2  
3 smoke at all are defined as non-smokers. In accordance to their answers within the  
4 survey, non-smokers will be divided in “former smokers” and in “non-smokers who  
5 have never smoked before”.  
6  
7  
8  
9

## 14 **Statistical analysis**

### 17 Sample Size Calculation

19  
20 As there is no other evaluated school-based programme delivered by medical students, our  
21 study has an explorative character. Still, we decided to calculate the sample size (using the  
22 programme BiAS for Windows) on the basis of a recently published study which evaluated  
23 the “Non-smoking is Cool” school-based physician delivered programme in Hamburg [18].  
24 To calculate the sample based on effect size requirements, we used the difference in the  
25 number of persons who started smoking within nine months between the intervention and  
26 control group at grammar schools investigated in the reference study (6.4% in the  
27 intervention group vs. 12% in the control group yields a difference of 5.6%) [16]. We  
28 decided to use the method of Sack et al. for our calculations because “Students in the  
29 Hospital” mainly included school types with a lower educational level. We used the rates for  
30 grammar school students, who will be the largest group of participants in our study. Thus,  
31 we calculated that the required sample size is 435 pupils per group (870 total), plus the loss  
32 to follow-up group at a test power of 80% (alpha = 0.05). We took into account the loss to  
33 follow-up effect of “Students in the Hospital” (17,8%), which increased our group size to n1 =  
34 514 and n2 = 514 (total: 1028) [15].  
35  
36  
37  
38  
39  
40  
41  
42  
43  
44  
45  
46  
47  
48  
49  
50  
51  
52

### 54 Analysis

56 In order to examine baseline differences of pupils' characteristics in our quasi-  
57 experimental design we will use  $\chi^2$ -tests for the categorical variables and t-tests for  
58  
59  
60

1  
2  
3 continuous variables. There must be no significant differences between the two study  
4  
5 groups at baseline (t1). The effects of predictors (like gender, culture and social  
6  
7 characteristics) on the smoking behaviour after six months (t2) will be calculated by  
8  
9 logistic regression analysis, a state-of-the-art technique for the evaluation of the  
10  
11 effectiveness of prevention programmes [22, 25, 26] in longitudinal studies. The  
12  
13 significance level is 5% for t-tests (double-sided) and 95% for confidence intervals  
14  
15 (double-sided). The statistical analysis will be performed using the newest version of  
16  
17 SPSS Statistics for Mac by IBM.  
18  
19

### Legal approval

20  
21  
22  
23  
24 In accordance with Good Epidemiologic Practice (GEP) guidelines [24], the study  
25  
26 protocol was submitted for approval by the responsible ethics committee, which  
27  
28 decided that the study does not need ethical approval (ethics committee of Goethe  
29  
30 University, Frankfurt-Main, Germany). All legal and data protection issues were  
31  
32 discussed with the responsible authority, the Ministry of Education and Cultural  
33  
34 Affairs in Germany, which approved the proposed data collection within the  
35  
36 participating schools. In addition, each school individually discussed and approved  
37  
38 the study at a school conference. It was explained to each student that participation  
39  
40 is voluntarily, and informed written consent was obtained from the parents of the  
41  
42 study participants.  
43  
44  
45  
46  
47  
48  
49

### **Discussion**

#### Strengths and limitations

1  
2  
3 No evaluation of a medical student-delivered school-based tobacco prevention  
4 programme is available to date. It is imperative to sensitize prospective physicians to  
5 tobacco prevention [13]. An additional aim of this study is to evaluate whether a  
6  
7 medical student-delivered smoking prevention program has preventive effects on the  
8 smoking behaviour of secondary school pupils in Germany. The data from this study  
9  
10 will provide a sound basis for optimizing the Education Against Tobacco curriculum to  
11 make it optimally effective for different target groups. A promising factor of the EAT  
12 programme is that it uses a combined social influence and social competence  
13 approach, which was been shown to be effective in the recently published Cochrane  
14 Analysis [14].  
15  
16  
17  
18  
19  
20  
21  
22  
23  
24

25  
26 Our study has a quasi-experimental design. The main problem of this kind of study is  
27 selection bias due to the lack of randomization. To minimize this problem, we will  
28  
29 match the intervention classes with ~~parallel~~-control classes (same grade and school),  
30  
31 which corresponds to the matching procedure in field experiments.  
32  
33  
34

35 As the intervention and control groups attend the same schools, the pupils could  
36 exchange what they learn about smoking in the intervention during school breaks.  
37  
38 Therefore cluster effects cannot be excluded entirely.  
39  
40  
41

42 Also, as our research is not multi-national, it might not be useful for persons of all  
43 ethnic and cultural backgrounds.  
44  
45  
46

47  
48 Because our study relies on self-reports obtained from adolescents via a  
49 questionnaire for data collection, there is a risk that the actual prevalence of smoking  
50 may be different from the reported prevalence, e.g. due to social desirability bias.  
51  
52

53 This bias can only be excluded by using expensive methods like testing for cotinine  
54 (a metabolite of nicotine) in the saliva, blood or urine of the students. Other  
55 alternatives described by Ketala et al. (2004) include the measurement of  
56  
57  
58  
59  
60

1  
2  
3 thiocyanate in saliva or carbon monoxide in exhaled air [27]. This group reported  
4  
5 95% agreement between the results of these biochemical tests and the results of  
6  
7 questionnaires. Conversely, Connor Gorber et al. (2009) found high differences  
8  
9 between biochemically assessed and self-reported smoking status in pregnant  
10  
11 women and patients with tobacco-related diseases [28]. In our study, there might be  
12  
13 social desirability bias in both study groups, which might make the intervention look  
14  
15 less effective than it actually is:  
16  
17

18  
19 The first measurement at baseline occurs while the intervention group is anticipating  
20  
21 the intervention. Therefore, more intervention group students might feel compelled to  
22  
23 behave in a socially desirable way and falsely declare that they are non-smokers. In  
24  
25 contrast, the control group students know that they will not see the medical students  
26  
27 again anytime soon, so they might be inclined to answer more honestly to the items  
28  
29 on the questionnaire. At the second measurement time point, the situation is  
30  
31 reversed: Because the intervention group students know that the medical students  
32  
33 will not come back, they might feel less social desirability pressure and be more likely  
34  
35 to admit that they are smokers. In contrast, the control group students will be  
36  
37 awaiting the next intervention in the coming weeks, so they might reply to the  
38  
39 questionnaires in a more socially desired way (declaring that they are non-smokers  
40  
41 even if they smoke).  
42  
43  
44  
45

46  
47 Consequently, the study could be compromised by social desirability bias at both  
48  
49 time points, which could make the intervention look less effective.  
50  
51

52  
53 In order to measure the long-term effects of school-based programmes, follow-up  
54  
55 data is usually collected six months and one year after an intervention. However, we  
56  
57 will only be able to collect data six months post-intervention because the schools  
58  
59  
60



1  
2  
3 insisted on us providing an intervention for the control group in the same school year.  
4  
5 Thus, we will not be able to determine which effects the intervention might have at  
6  
7 one year follow-up.  
8  
9

## 10 **Conclusion**

11  
12 We expect that our research will find general acceptance because the investigated  
13  
14 programme provides many medical students and even more medical interns (e.g., in  
15  
16 the elective period known) a great opportunity to deliver prevention programmes not  
17  
18 only in inpatient secondary prevention, but also and in particular in primary  
19  
20 prevention in schools and communities. Health systems worldwide could benefit from  
21  
22 the development of such novel and low-cost primary smoking prevention  
23  
24 programmes.  
25  
26  
27  
28  
29  
30  
31

## 32 **Authors' contributions**

33  
34 TJB contributed to the design and conduct of the study, drafted the manuscript, and  
35  
36 will perform the statistical analysis. WS supports the coordination of the study. SS-B  
37  
38 contributed to the design of the study, participated in the writing process, and  
39  
40 proofread the manuscript. DAG contributed to the design of the study and proofread  
41  
42 the manuscript. All authors read and approved the final manuscript. This study is part  
43  
44 of a thesis project (TJB).  
45  
46  
47  
48  
49

## 50 **Competing interests:**

51  
52 The authors declare that they have no competing interests.  
53  
54

## 55 **Funding:**

56  
57 Each participating school pays a small fee for the copies of the questionnaire that are  
58  
59  
60

being distributed to every participating student. There are no other funding sources available.

## REFERENCES

1. World Health Organization: **WHO report on the global tobacco epidemic.** [http://whqlibdoc.who.int/publications/2011/9789240687813\\_eng.pdf](http://whqlibdoc.who.int/publications/2011/9789240687813_eng.pdf) 2011.
2. Mons U: **[Tobacco-attributable mortality in Germany and in the German Federal States - calculations with data from a microcensus and mortality statistics].** *Gesundheitswesen* 2011, **73**(4):238-246.
3. Neubauer S, Welte R, Beiche A, Koenig HH, Buesch K, Leidl R: **Mortality, morbidity and costs attributable to smoking in Germany: update and a 10-year comparison.** *Tobacco control* 2006, **15**(6):464-471.
4. Hausteil K-O GD: **Tobacco or Health? Physiological and Social Damages Caused by Tobacco Smoking.** In: *Springer 2009.* edn.; 2009.
5. Bundeszentrale für gesundheitliche Aufklärung (BZgA): **Der Tabakkonsum Jugendlicher und junger Erwachsener in Deutschland 2012. (Bericht).** In: *Teilband Rauchen (Bericht).* 2013.
6. Kraus L RS, Baumeister SE, Pabst A, Steiner S: **Epidemiologischer Suchtsurvey 2006. Repräsentativerhebung zum Gebrauch und Missbrauch psychoaktiver Substanzen bei Jugendlichen und Erwachsenen in Berlin. .** In: *IFT-Bericht Band 167.* München.; 2008.
7. Laucht M SB: **Früher Einstieg in den Alkohol- und Tabakkonsum – Indikator für eine erhöhte Suchtgefährdung? .** *Z Kinder Jugendpsychiatr Psychother* 2007;35: 137–143.
8. Bundeszentrale für gesundheitliche Aufklärung (BZgA): **Die Drogenaffinität Jugendlicher in der Bundesrepublik Deutschland 2011.** In: *Teilband Rauchen (Bericht).* 2012.
9. Maziak W: **The global epidemic of waterpipe smoking.** *Addictive behaviors* 2011, **36**(1-2):1-5.
10. Isensee B, Morgenstern M, Stoolmiller M, Maruska K, Sargent JD, Hanewinkel R: **Effects of Smokefree Class Competition 1 year after the end of intervention: a cluster randomised controlled trial.** *Journal of epidemiology and community health* 2012, **66**(4):334-341.
11. Hoeflmayr D, Hanewinkel R: **Do school-based tobacco prevention programmes pay off? The cost-effectiveness of the 'Smoke-free Class Competition'.** *Public health* 2008, **122**(1):34-41.
12. Johnston V, Liberato S, Thomas D: **Incentives for preventing smoking in children and adolescents.** *The Cochrane database of systematic reviews* 2012, **10**:CD008645.

13. Bernstein SL, Yu S, Post LA, Dziura J, Rigotti NA: **Undertreatment of tobacco use relative to other chronic conditions.** *American journal of public health* 2013, **103**(8):e59-65.
14. Thomas RE, McLellan J, Perera R: **School-based programmes for preventing smoking.** *The Cochrane database of systematic reviews* 2013, **4**:CD001293.
15. Stamm-Balderjahn S, Groneberg DA, Kusma B, Jagota A, Schonfeld N: **Smoking prevention in school students: positive effects of a hospital-based intervention.** *Deutsches Arzteblatt international* 2012, **109**(44):746-752.
16. Sack P-M, Hampel J, Bröning S, Petersen KU, Andritzky B, Laack E, Thomasius R: **Was limitiert schulische Tabakprävention?** *Prävention und Gesundheitsförderung* 2013, **8**(4):246-251.
17. Springfield IPF: **Ineffectiveness of Fear Appeals in Youth Alcohol, Tobacco and Other Drug (ATOD) Prevention.** *Prevention First (2008)* 2008.
18. Sack P-M, Hampel J, Bröning S, Petersen KU, Andritzky B, Andritzky B, Laack E, Thomasius R: **Was limitiert schulische Tabakprävention?** *Prävention und Gesundheitsförderung* 2013, **8**(4):246-251.
19. Akl EA, Gunukula SK, Aleem S, Obeid R, Jaoude PA, Honeine R, Irani J: **The prevalence of waterpipe tobacco smoking among the general and specific populations: a systematic review.** *BMC public health* 2011, **11**:244.
20. Thomas R, Perera R: **School-based programmes for preventing smoking.** *The Cochrane database of systematic reviews* 2006(3):CD001293.
21. Sussman S SP, McCuller WJ, Dent CW **Project Towards No Drug Abuse: two-year outcomes of a trial that compares health educator delivery to self-instruction.** *Prev Med* 2003 Aug;**37**(2):155-62 2003.
22. Maier B, Bau AM, James J, Gorgen R, Graf C, Hanewinkel R, Martus P, Maschewsky-Schneider U, Muller MJ, Plachta-Danielzik S *et al*: **Methods for evaluation of health promotion programmes. Smoking prevention and obesity prevention for children and adolescents.** *Bundesgesundheitsblatt, Gesundheitsforschung, Gesundheitsschutz* 2007, **50**(7):980-986.
23. Lampert T, Thamm M: **[Consumption of tobacco, alcohol and drugs among adolescents in Germany. Results of the German Health Interview and Examination Survey for Children and Adolescents (KiGGS)].** *Bundesgesundheitsblatt, Gesundheitsforschung, Gesundheitsschutz* 2007, **50**(5-6):600-608.
24. Epidemiologie DAfr: **Leitlinien und Empfehlungen zur Sicherung von Guter Epidemiologischer Praxis (GEP).** *BMBF Gesundheitsforschung*: [http://www.gesundheitsforschung-bmbfde/media/Empfehlungen\\_GEPpdf](http://www.gesundheitsforschung-bmbfde/media/Empfehlungen_GEPpdf) 2004.
25. Pbert L, Flint AJ, Fletcher KE, Young MH, Druker S, DiFranza JR: **Effect of a pediatric practice-based smoking prevention and cessation intervention for adolescents: a randomized, controlled trial.** *Pediatrics* 2008, **121**(4):e738-747.
26. Sloboda Z, Stephens RC, Stephens PC, Grey SF, Teasdale B, Hawthorne RD, Williams J, Marquette JF: **The Adolescent Substance Abuse Prevention Study: A randomized field trial of a universal substance abuse prevention program.** *Drug and alcohol dependence* 2009, **102**(1-3):1-10.
27. Kentala J, Utriainen P, Pahkala K, Mattila K: **Verification of adolescent self-reported smoking.** *Addictive behaviors* 2004, **29**(2):405-411.
28. Connor Gorber S, Schofield-Hurwitz S, Hardt J, Levasseur G, Tremblay M: **The accuracy of self-reported smoking: a systematic review of the relationship**

1  
2  
3  
4  
5  
6  
7  
8  
9  
10  
11  
12  
13  
14  
15  
16  
17  
18  
19  
20  
21  
22  
23  
24  
25  
26  
27  
28  
29  
30  
31  
32  
33  
34  
35  
36  
37  
38  
39  
40  
41  
42  
43  
44  
45  
46  
47  
48  
49  
50  
51  
52  
53  
54  
55  
56  
57  
58  
59  
60

**between self-reported and cotinine-assessed smoking status.** *Nicotine & tobacco research : official journal of the Society for Research on Nicotine and Tobacco* 2009, **11**(1):12-24.

For peer review only

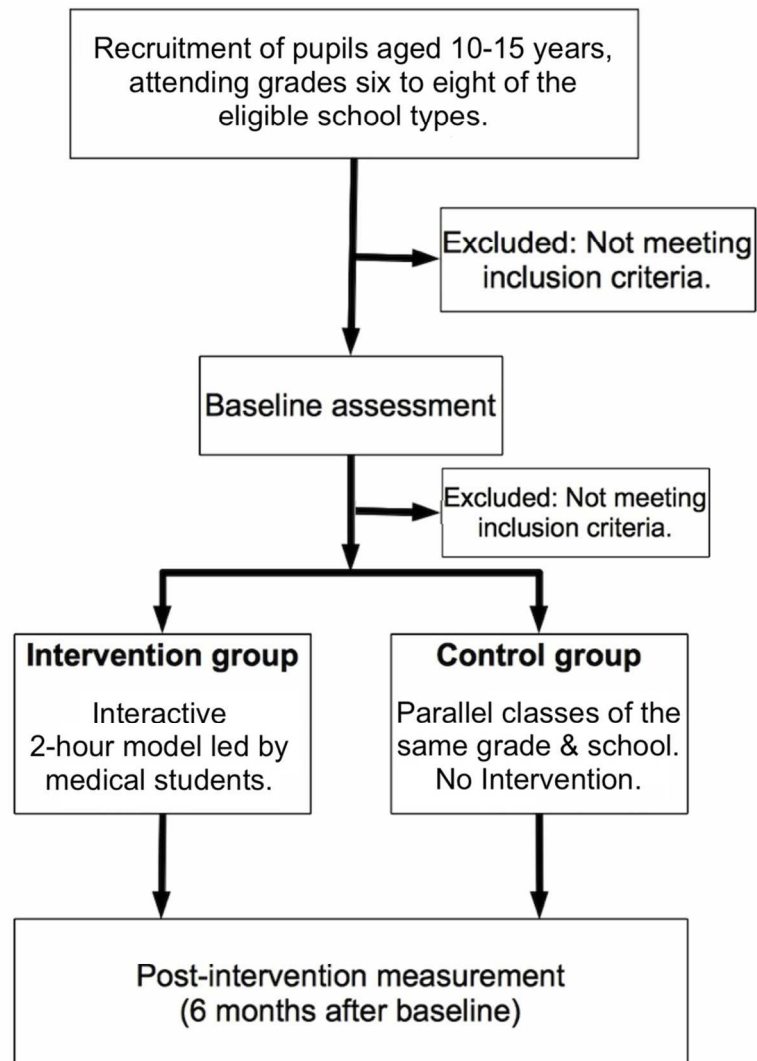

**Figure 1**  
**Study design.**

87x124mm (300 x 300 DPI)

## STROBE Statement—checklist of items that should be included in reports of observational studies

|                              | Item No | Recommendation                                                                                                                                                                                                                                                                                                                                                                                                                        |
|------------------------------|---------|---------------------------------------------------------------------------------------------------------------------------------------------------------------------------------------------------------------------------------------------------------------------------------------------------------------------------------------------------------------------------------------------------------------------------------------|
| <b>Title and abstract</b>    | 1       | (a) Indicate the study's design with a commonly used term in the title or the abstract<br>(b) Provide in the abstract an informative and balanced summary of what was done and what was found <b>checked</b>                                                                                                                                                                                                                          |
| <b>Introduction</b>          |         |                                                                                                                                                                                                                                                                                                                                                                                                                                       |
| Background/rationale         | 2       | Explain the scientific background and rationale for the investigation being reported <b>checked</b>                                                                                                                                                                                                                                                                                                                                   |
| Objectives                   | 3       | State specific objectives, including any prespecified hypotheses <b>checked</b>                                                                                                                                                                                                                                                                                                                                                       |
| <b>Methods</b>               |         |                                                                                                                                                                                                                                                                                                                                                                                                                                       |
| Study design                 | 4       | Present key elements of study design early in the paper <b>checked</b>                                                                                                                                                                                                                                                                                                                                                                |
| Setting                      | 5       | Describe the setting, locations, and relevant dates, including periods of recruitment, exposure, follow-up, and data collection <b>checked</b>                                                                                                                                                                                                                                                                                        |
| Participants                 | 6       | (a) <i>Case-control study</i> —Give the eligibility criteria, and the sources and methods of case ascertainment and control selection. Give the rationale for the choice of cases and controls <b>checked</b><br>(b) <i>Case-control study</i> —For matched studies, give matching criteria and the number of controls per case <b>checked</b>                                                                                        |
| Variables                    | 7       | Clearly define all outcomes, exposures, predictors, potential confounders, and effect modifiers. Give diagnostic criteria, if applicable <b>checked</b>                                                                                                                                                                                                                                                                               |
| Data sources/<br>measurement | 8*      | For each variable of interest, give sources of data and details of methods of assessment (measurement). Describe comparability of assessment methods if there is more than one group <b>checked</b>                                                                                                                                                                                                                                   |
| Bias                         | 9       | Describe any efforts to address potential sources of bias <b>checked</b>                                                                                                                                                                                                                                                                                                                                                              |
| Study size                   | 10      | Explain how the study size was arrived at <b>checked</b>                                                                                                                                                                                                                                                                                                                                                                              |
| Quantitative variables       | 11      | Explain how quantitative variables were handled in the analyses. If applicable, describe which groupings were chosen and why <b>checked</b>                                                                                                                                                                                                                                                                                           |
| Statistical methods          | 12      | (a) Describe all statistical methods, including those used to control for confounding <b>checked</b><br>(b) Describe any methods used to examine subgroups and interactions <b>checked</b><br>(c) Explain how missing data were addressed <b>checked</b><br><i>Case-control study</i> —If applicable, explain how matching of cases and controls was addressed <b>checked</b><br>(e) Describe any sensitivity analyses <b>checked</b> |

Continued on next page

**Results**

|                  |     |                                                                                                                                                                                                                                                                                                                                                                                                                                                            |
|------------------|-----|------------------------------------------------------------------------------------------------------------------------------------------------------------------------------------------------------------------------------------------------------------------------------------------------------------------------------------------------------------------------------------------------------------------------------------------------------------|
| Participants     | 13* | (a) Report numbers of individuals at each stage of study—eg numbers potentially eligible, examined for eligibility, confirmed eligible, included in the study, completing follow-up, and analysed <b>checked</b><br>(b) Give reasons for non-participation at each stage <b>checked</b><br>(c) Consider use of a flow diagram <b>checked</b>                                                                                                               |
| Descriptive data | 14* | (a) Give characteristics of study participants (eg demographic, clinical, social) and information on exposures and potential confounders <b>checked</b><br>(b) Indicate number of participants with missing data for each variable of interest <b>checked</b>                                                                                                                                                                                              |
| Outcome data     | 15* | <i>Cohort study</i> —Report numbers of outcome events or summary measures over time<br><i>Case-control study</i> —Report numbers in each exposure category, or summary measures of exposure <b>checked</b><br><i>Cross-sectional study</i> —Report numbers of outcome events or summary measures                                                                                                                                                           |
| Main results     | 16  | (a) Give unadjusted estimates and, if applicable, confounder-adjusted estimates and their precision (eg, 95% confidence interval). Make clear which confounders were adjusted for and why they were included <b>checked</b><br>(b) Report category boundaries when continuous variables were categorized <b>checked</b><br>(c) If relevant, consider translating estimates of relative risk into absolute risk for a meaningful time period <b>checked</b> |
| Other analyses   | 17  | Report other analyses done—eg analyses of subgroups and interactions, and sensitivity analyses <b>checked</b>                                                                                                                                                                                                                                                                                                                                              |

**Discussion**

|                  |    |                                                                                                                                                                                           |
|------------------|----|-------------------------------------------------------------------------------------------------------------------------------------------------------------------------------------------|
| Key results      | 18 | Summarise key results with reference to study objectives <b>checked</b>                                                                                                                   |
| Limitations      | 19 | Discuss limitations of the study, taking into account sources of potential bias or imprecision. Discuss both direction and magnitude of any potential bias <b>checked</b>                 |
| Interpretation   | 20 | Give a cautious overall interpretation of results considering objectives, limitations, multiplicity of analyses, results from similar studies, and other relevant evidence <b>checked</b> |
| Generalisability | 21 | Discuss the generalisability (external validity) of the study results <b>checked</b>                                                                                                      |

**Other information**

|         |    |                                                                                                                                                                              |
|---------|----|------------------------------------------------------------------------------------------------------------------------------------------------------------------------------|
| Funding | 22 | Give the source of funding and the role of the funders for the present study and, if applicable, for the original study on which the present article is based <b>checked</b> |
|---------|----|------------------------------------------------------------------------------------------------------------------------------------------------------------------------------|

\*Give information separately for cases and controls in case-control studies and, if applicable, for exposed and unexposed groups in cohort and cross-sectional studies.

**Note:** An Explanation and Elaboration article discusses each checklist item and gives methodological background and published examples of transparent reporting. The STROBE checklist is best used in conjunction with this article (freely available on the Web sites of PLoS Medicine at <http://www.plosmedicine.org/>, Annals of Internal Medicine at <http://www.annals.org/>, and Epidemiology at <http://www.epidem.com/>). Information on the STROBE Initiative is available at [www.strobe-statement.org](http://www.strobe-statement.org).
